# Supplementary material for: Phosphine-catalyzed γ-addition of nitroacetates to allenoates for enantioselective creation of α,α-disubstituted α-amino acid precursors
Source: Royal Society of Chemistry journal article supplement (doi:10.1039/d1qo01016f), 2021-01-01

## *Electronic Supplementary Information*

# **Phosphine-catalyzed $\gamma$ -addition of nitroacetates to allenoates for enantioselective creation of $\alpha,\alpha$ -disubstituted $\alpha$ -amino acids precursors**

Kaizhi Li<sup>a</sup> and Yixin Lu<sup>\*b,c</sup>

<sup>a</sup>Biopharmaceutical Research Institute, West China Hospital, Sichuan University, Chengdu 610041, China.

<sup>b</sup>Department of Chemistry, National University of Singapore, 3 Science Drive 3, Singapore 117543.

<sup>c</sup>Joint School of National University of Singapore and Tianjin University, International Campus of Tianjin University, Binhai New City, Fuzhou, Fujian, 350207, China.

\*Email: [chmlyx@nus.edu.sg](mailto:chmlyx@nus.edu.sg)

### **Table of contents**

|                                                                                                                                         |    |
|-----------------------------------------------------------------------------------------------------------------------------------------|----|
| I. General remarks.....                                                                                                                 | 2  |
| II. Optimization of the reaction conditions .....                                                                                       | 2  |
| III. Representative procedure for the enantioselective phosphine-catalyzed $\gamma$ -addition<br>of nitroacetates with allenoates ..... | 5  |
| IV. Experimental data for the described substances.....                                                                                 | 5  |
| V. Synthetic manipulation of the product. ....                                                                                          | 53 |
| VI. Determination of the absolute configuration of <b>5b</b> .....                                                                      | 57 |
| VII. References .....                                                                                                                   | 58 |
| VIII. Copies of <sup>1</sup> H and <sup>13</sup> C NMR spectra .....                                                                    | 60 |

## I. General remarks

Unless otherwise specified, all reactions were carried out under a nitrogen atmosphere.  $\text{CHCl}_3$  were used without further purification. All chemicals were used without further purification as commercially available unless otherwise noted. Thin-layer chromatography (TLC) was performed on silica gel plates (60F-254) using UV-light (254 and 365 nm). Flash chromatography was conducted on silica gel (300–400 mesh). NMR spectra were recorded on a Bruker AMX500 (500 MHz) spectrometer. Chemical shifts were reported in parts per million (ppm) The  $^1\text{H}$  NMR (500 MHz) chemical shifts were measured relative to  $\text{CDCl}_3$  as the internal reference ( $\text{CDCl}_3$ :  $\delta = 7.26$  ppm). The  $^{13}\text{C}$  NMR (125 MHz) chemical shifts were given using  $\text{CDCl}_3$  as the internal standard ( $\text{CDCl}_3$ :  $\delta = 77.16$  ppm). All high resolution mass spectra (HRMS) were obtained on a Finnigan/MAT 95XL-T spectrometer. Optical rotations were measured using an Anton Paar MCP-100 polarimeter. Enantiomeric excesses were determined by HPLC analysis on a chiral stationary phase. The racemic sample was prepared by  $\text{MePPh}_2$  catalysis. Catalysts were synthesized by following our previously reported procedures.<sup>1</sup> Nitroacetates were prepared according to the literatures.<sup>2</sup>

## II. Optimization of the reaction conditions

**Table S1:** Optimization of the phosphine-catalyzed enantioselective  $\gamma$ -addition of ethyl 2-nitro-3-phenylpropanoate **1a** with benzyl buta-2,3-dienoate **2a**<sup>a</sup>

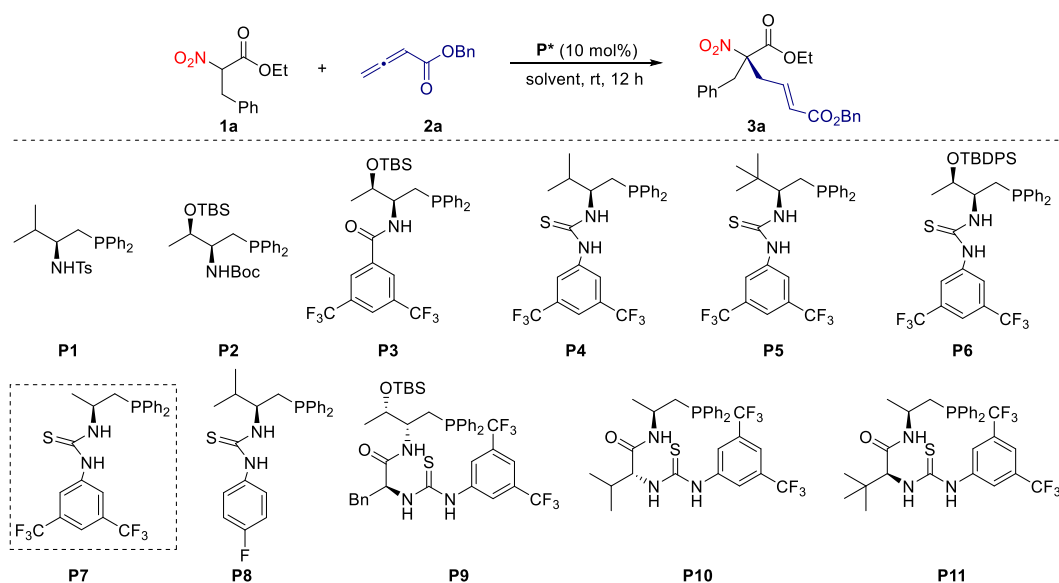

| Entry           | Cat. (mol%)             | Solvent                         | Yield (%) <sup>b</sup> | <i>Ee</i> (%) <sup>c</sup> |
|-----------------|-------------------------|---------------------------------|------------------------|----------------------------|
| 1               | MePPh <sub>2</sub> (10) | toluene                         | 90                     | --                         |
| 2               | <b>P1</b> (10)          | toluene                         | 91                     | 27                         |
| 3               | <b>P2</b> (10)          | toluene                         | 89                     | 19                         |
| 4               | <b>P3</b> (10)          | toluene                         | 75                     | 7                          |
| 5               | <b>P4</b> (10)          | toluene                         | 93                     | 65                         |
| 6               | <b>P5</b> (10)          | toluene                         | 87                     | 17                         |
| 7               | <b>P6</b> (10)          | toluene                         | 86                     | 36                         |
| <b>8</b>        | <b>P7 (10)</b>          | <b>toluene</b>                  | <b>94</b>              | <b>77</b>                  |
| 9               | <b>P8</b> (10)          | toluene                         | 68                     | 39                         |
| 10              | <b>P9</b> (10)          | toluene                         | 65                     | 9                          |
| 11              | <b>P10</b> (10)         | toluene                         | 89                     | 3                          |
| 12              | <b>P11</b> (10)         | toluene                         | trace                  | --                         |
| 13              | <b>P7</b> (10)          | CH <sub>2</sub> Cl <sub>2</sub> | 90                     | 66                         |
| 14              | <b>P7</b> (10)          | CHCl <sub>3</sub>               | 89                     | 72                         |
| 15              | <b>P7</b> (10)          | THF                             | n.d.                   | --                         |
| 16              | <b>P7</b> (10)          | Et <sub>2</sub> O               | 90                     | 73                         |
| 17              | <b>P7</b> (10)          | EtOAc                           | 89                     | 55                         |
| 18              | <b>P7</b> (10)          | CH <sub>3</sub> CN              | 81                     | 38                         |
| 19              | <b>P7</b> (10)          | PhCl                            | 90                     | 75                         |
| 20              | <b>P7</b> (10)          | dioxane                         | 88                     | 63                         |
| 21              | <b>P7</b> (10)          | PhCF <sub>3</sub>               | 88                     | 72                         |
| 22 <sup>d</sup> | <b>P7</b> (10)          | toluene                         | 89                     | 64                         |
| 23 <sup>e</sup> | <b>P7</b> (10)          | toluene                         | 91                     | 68                         |
| 24 <sup>f</sup> | <b>P7</b> (10)          | toluene                         | 92                     | 76                         |
| 25 <sup>g</sup> | <b>P7</b> (10)          | toluene                         | 91                     | 75                         |
| 26 <sup>h</sup> | <b>P7</b> (10)          | toluene                         | 88                     | 72                         |

<sup>a</sup> Reaction conditions: **1a** (0.05 mmol), **2a** (0.075 mmol, 1.5 equiv.) and cat. in solvent (1.0 mL) at room temperature for 12 h. <sup>b</sup> Yield of isolated **3a**. <sup>c</sup> The *ee* values of **3a** was determined by HPLC analysis on a chiral-stationary-phase column. <sup>d</sup> PhOH (0.5 equiv.) was used as the additive. <sup>e</sup> PhCOOH (0.1 equiv.) was used as the additive. <sup>f</sup> 0 °C for 24 h. <sup>g</sup> -10 °C for 72 h. <sup>h</sup> 4 Å MS (50.0 mg) was used as the additive. n.d. = not detected.

**Table S2:** Optimization of the phosphine-catalyzed enantioselective  $\gamma$ -addition of ethyl 2-nitro-3-phenylpropanoate **1a** with allenates **2<sup>a</sup>**

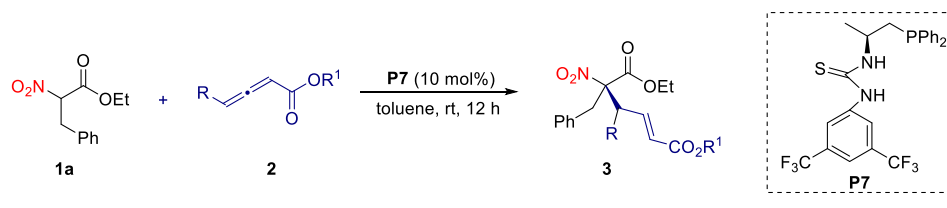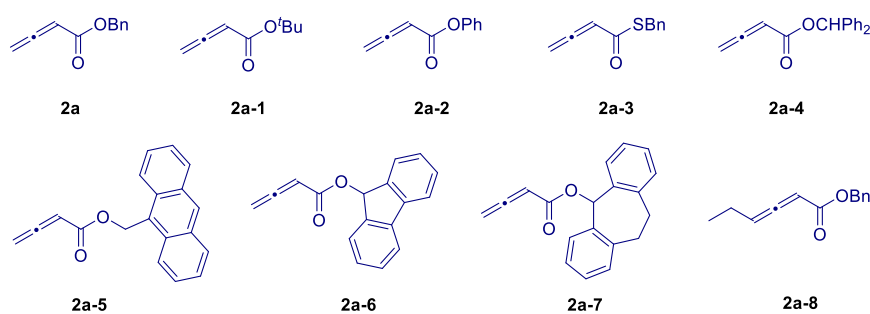

| Entry             | Allenoate ( <b>2</b> ) | Product ( <b>3</b> ) | Yield (%) <sup>b</sup> | <i>Ee</i> (%) <sup>c</sup> |
|-------------------|------------------------|----------------------|------------------------|----------------------------|
| 1                 | <b>2a</b>              | <b>3a</b>            | 94                     | 77                         |
| 2                 | <b>2a-1</b>            | <b>3a-1</b>          | 96                     | 68                         |
| 3                 | <b>2a-2</b>            | <b>3a-2</b>          | 97                     | 66                         |
| 4                 | <b>2a-3</b>            | <b>3a-3</b>          | 90                     | 63                         |
| 5                 | <b>2a-4</b>            | <b>3a-4</b>          | 93                     | 80                         |
| 6                 | <b>2a-5</b>            | <b>3a-5</b>          | 91                     | 83                         |
| 7                 | <b>2a-6</b>            | <b>3a-6</b>          | 91                     | 83                         |
| 8                 | <b>2a-7</b>            | <b>3a-7</b>          | 92                     | 80                         |
| 9                 | <b>2a-7</b>            | <b>3a-8</b>          | n.d.                   | --                         |
| 10 <sup>d</sup>   | <b>2a-6</b>            | <b>3a-6</b>          | 91                     | 83                         |
| 11 <sup>e</sup>   | <b>2a-7</b>            | <b>3a-7</b>          | 92                     | 87                         |
| 12 <sup>d,e</sup> | <b>2a-7</b>            | <b>3a-7</b>          | <b>93</b>              | <b>90</b>                  |
| 13 <sup>e,f</sup> | <b>2a-7</b>            | <b>3a-7</b>          | 91                     | 85                         |
| 14                | <b>2a-8</b>            | <b>3a-8</b>          | n.d.                   | --                         |

<sup>a</sup> Reaction conditions: **1a** (0.05 mmol), **2** (0.075 mmol, 1.5 equiv.) and **P7** (10.0 mol%) in toluene (1.5 mL) at room temperature for 12 h. <sup>b</sup> Yield of isolated **3**. <sup>c</sup> The *ee* values of **3** was determined by HPLC analysis on a chiral-stationary-phase column. <sup>d</sup> 0 °C for 24 h. <sup>e</sup> 4 Å MS (50.0 mg) was used as the additive. <sup>f</sup> -10 °C for 72 h. n.d. = not detected.

### III. Representative procedure for the enantioselective phosphine-catalyzed $\gamma$ -addition of nitroacetates with allenates

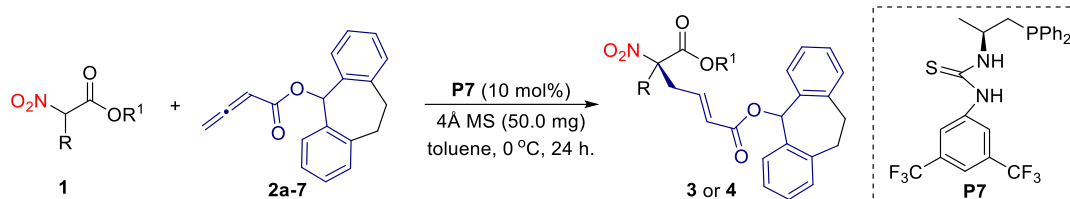

A dried tube with a magnetic stir bar was charged with nitroacetates **1** (0.05 mmol, 1.0 equiv.), catalyst **P7** (0.005 mmol, 10 mol%), 4 Å MS (50.0 mg), followed by the addition of toluene (1.0 mL). Then allenate **2a-7** (0.075 mmol, 1.5 equiv.) was dissolved in toluene (0.5 mL) and dropwise added into the reaction mixture at 0 °C. The reaction mixture was then stirred at that temperature for 24 hours. Then the solvent was evaporated and the residue was purified by column chromatography on silica gel using hexane/ethyl acetate as the eluent to afford the  $\gamma$ -addition products **3** or **4**.

### IV. Experimental data for the described substances

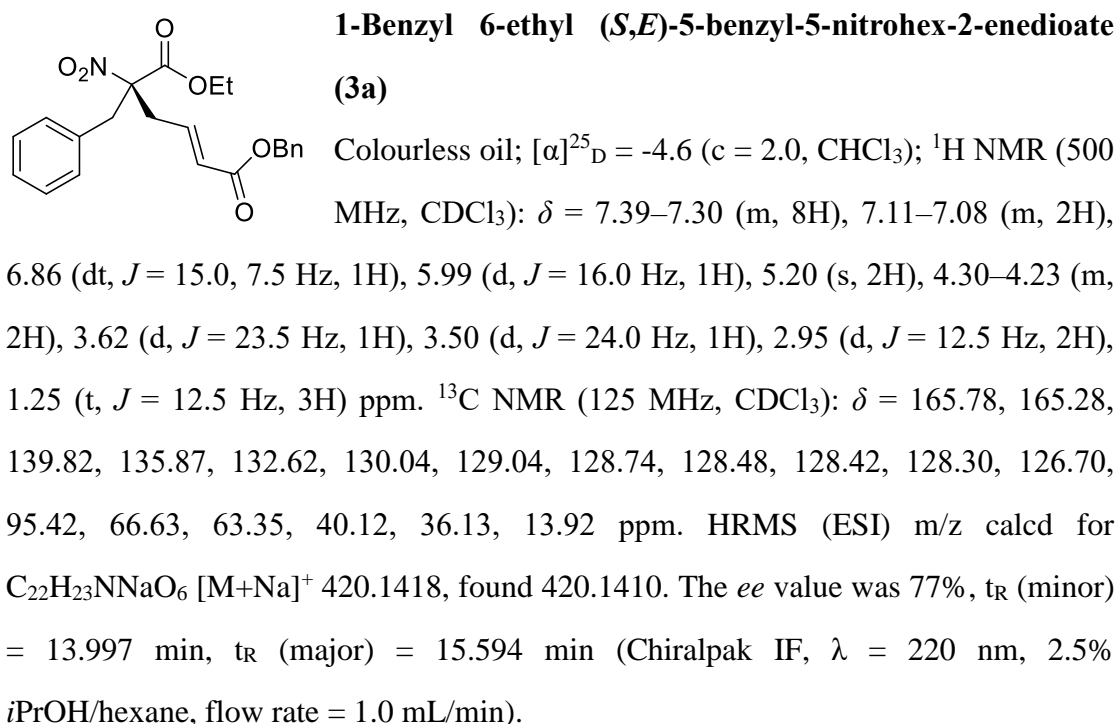

<Chromatogram>

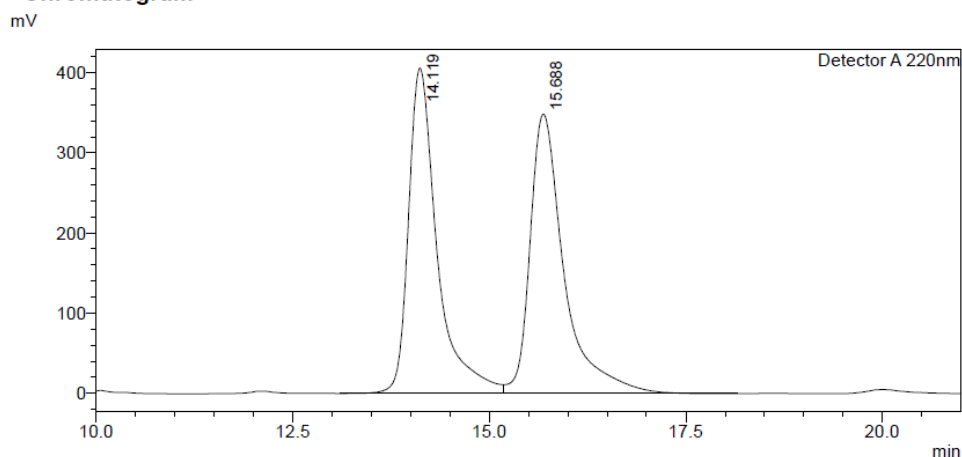

<Peak Table>

Detector A 220nm

| Peak# | Ret. Time | Area     | Height | Area%   | Conc.  | Name |
|-------|-----------|----------|--------|---------|--------|------|
| 1     | 14.119    | 10289698 | 405641 | 49.493  | 49.493 |      |
| 2     | 15.688    | 10500476 | 348450 | 50.507  | 50.507 |      |
| Total |           | 20790174 | 754091 | 100.000 |        |      |

<Chromatogram>

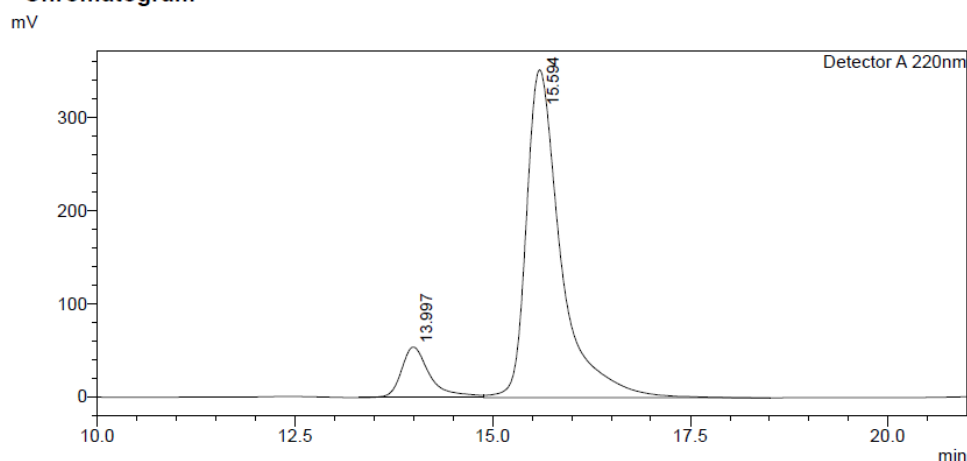

<Peak Table>

Detector A 220nm

| Peak# | Ret. Time | Area     | Height | Area%   | Conc.  | Name |
|-------|-----------|----------|--------|---------|--------|------|
| 1     | 13.997    | 1373174  | 54313  | 11.358  | 11.358 |      |
| 2     | 15.594    | 10716939 | 352070 | 88.642  | 88.642 |      |
| Total |           | 12090112 | 406383 | 100.000 |        |      |

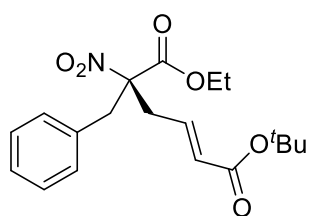

**1-(*tert*-Butyl) 6-ethyl (*S,E*)-5-benzyl-5-nitrohex-2-enedioate (3a-1)**

Colourless oil;  $[\alpha]_D^{25} = -3.1$  ( $c = 2.0$ ,  $\text{CHCl}_3$ );  $^1\text{H NMR}$  (500 MHz,  $\text{CDCl}_3$ ):  $\delta = 7.32\text{--}7.30$  (m, 3H), 7.10–7.09 (m, 2H), 6.70 (dt,  $J = 15.0, 7.5$  Hz, 1H), 5.87 (dt,  $J = 15.5, 1.0$  Hz, 1H), 4.31–4.24 (m, 2H), 3.61 (d,  $J = 14.0$  Hz, 1H), 3.49 (d,  $J = 14.5$  Hz, 1H), 2.91 (d,  $J = 7.5$  Hz, 2H), 1.48 (s, 9H), 1.27 (t,  $J = 7.0$  Hz, 3H) ppm.  $^{13}\text{C NMR}$  (125 MHz,  $\text{CDCl}_3$ ):  $\delta = 165.87$ ,

164.83, 137.75, 132.70, 130.04, 129.02, 128.85, 128.26, 95.50, 81.08, 63.29, 39.95, 35.88, 28.23, 13.95 ppm. HRMS (ESI)  $m/z$  calcd for  $C_{19}H_{25}NNaO_6$   $[M+Na]^+$  386.1574, found 386.1574. The *ee* value was 68%,  $t_R$  (minor) = 7.134 min,  $t_R$  (major) = 7.906 min (Chiralpak IF,  $\lambda$  = 220 nm, 2.5% *i*PrOH/hexane, flow rate = 1.0 mL/min).

<Chromatogram>

mV

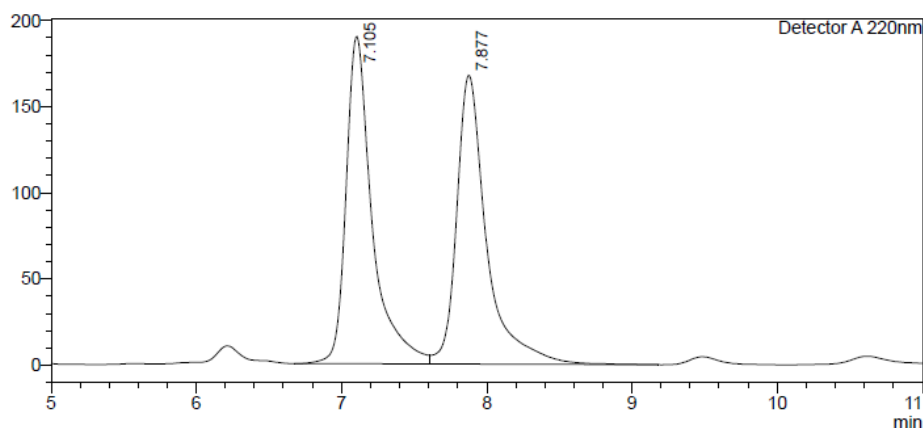

<Peak Table>

Detector A 220nm

| Peak# | Ret. Time | Area    | Height | Area%   | Conc.  | Name |
|-------|-----------|---------|--------|---------|--------|------|
| 1     | 7.105     | 2388026 | 190032 | 49.727  | 49.727 |      |
| 2     | 7.877     | 2414250 | 167815 | 50.273  | 50.273 |      |
| Total |           | 4802276 | 357846 | 100.000 |        |      |

<Chromatogram>

mV

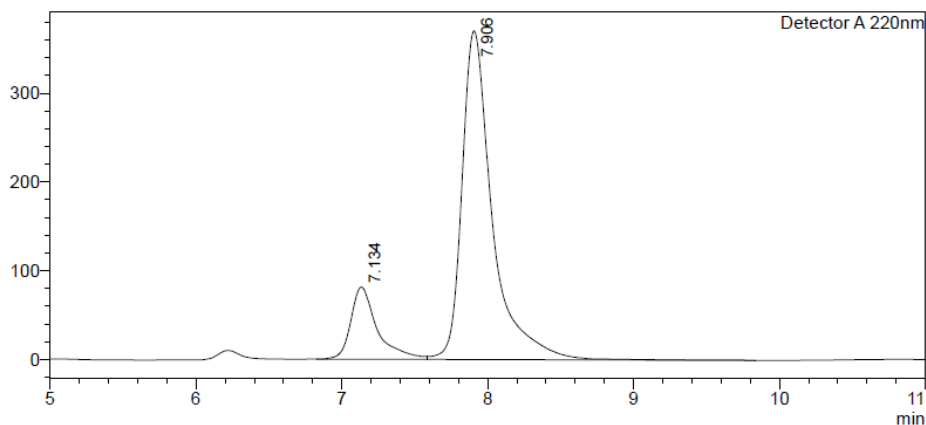

<Peak Table>

Detector A 220nm

| Peak# | Ret. Time | Area    | Height | Area%   | Conc.  | Name |
|-------|-----------|---------|--------|---------|--------|------|
| 1     | 7.134     | 1028612 | 81419  | 16.093  | 16.093 |      |
| 2     | 7.906     | 5363224 | 370656 | 83.907  | 83.907 |      |
| Total |           | 6391836 | 452074 | 100.000 |        |      |

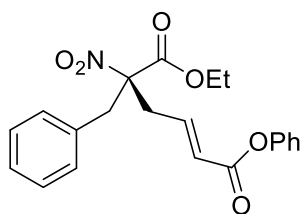

**6-Ethyl 1-phenyl (S,E)-5-benzyl-5-nitrohex-2-enedioate  
(3a-2)**

Colourless oil;  $[\alpha]_D^{25} = -3.9$  ( $c = 2.0$ ,  $\text{CHCl}_3$ );  $^1\text{H NMR}$  (500 MHz,  $\text{CDCl}_3$ ):  $\delta = 7.40$  (t,  $J = 8.0$  Hz, 2H) 7.35–7.33 (m, 3H), 7.27–7.24 (m, 1H), 7.14–7.11 (m, 4H), 7.01 (dt,  $J = 15.0, 7.5$  Hz, 1H), 6.14 (d,  $J = 15.5$  Hz, 1H), 4.36–4.26 (m, 2H), 3.66 (d,  $J = 14.5$  Hz, 1H), 3.55 (d,  $J = 14.0$  Hz, 1H), 3.03 (dd,  $J = 7.5, 1.0$  Hz, 2H), 1.30 (t,  $J = 7.5$  Hz, 3H) ppm.  $^{13}\text{C NMR}$  (125 MHz,  $\text{CDCl}_3$ ):  $\delta = 165.76, 163.82, 150.61, 141.43, 132.55, 130.05, 129.59, 129.10, 128.37, 126.23, 126.10, 121.61, 95.38, 63.45, 40.25, 36.30, 13.98$  ppm. HRMS (ESI)  $m/z$  calcd for  $\text{C}_{21}\text{H}_{21}\text{NNaO}_6$   $[\text{M}+\text{Na}]^+$  406.1261, found 406.1258. The *ee* value was 66%,  $t_R$  (major) = 25.602 min,  $t_R$  (minor) = 29.580 min (Chiralpak IC,  $\lambda = 254$  nm, 2.5% *i*PrOH/hexane, flow rate = 1.0 mL/min).

**<Chromatogram>**

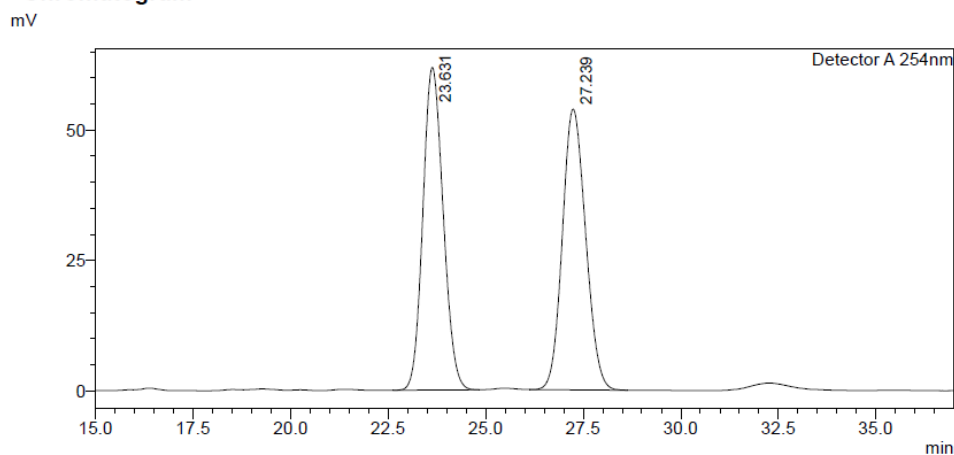

**<Peak Table>**

| Detector A 254nm |           |         |        |         |        |      |
|------------------|-----------|---------|--------|---------|--------|------|
| Peak#            | Ret. Time | Area    | Height | Area%   | Conc.  | Mark |
| 1                | 23.631    | 2243691 | 61880  | 50.069  | 50.069 |      |
| 2                | 27.239    | 2237474 | 53820  | 49.931  | 49.931 |      |
| Total            |           | 4481165 | 115700 | 100.000 |        |      |



<Chromatogram>

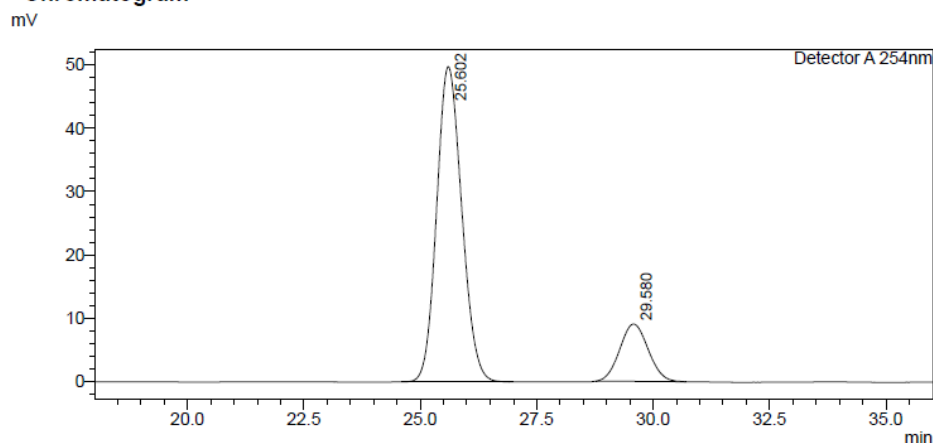

<Peak Table>

| Peak# | Ret. Time | Area    | Height | Area%   | Conc.  | Name |
|-------|-----------|---------|--------|---------|--------|------|
| 1     | 25.602    | 1867444 | 49714  | 82.950  | 82.950 |      |
| 2     | 29.580    | 383852  | 9040   | 17.050  | 17.050 |      |
| Total |           | 2251296 | 58754  | 100.000 |        |      |

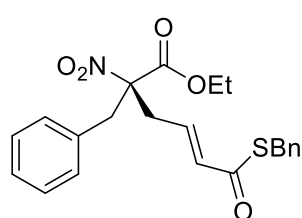

**Ethyl (*S,E*)-2-benzyl-6-((benzylthio)oxy)-2-nitro-6-oxohexenoate (3a-3)**

Colourless oil;  $[\alpha]_D^{25} = -0.8$  ( $c = 2.0$ ,  $\text{CHCl}_3$ );  $^1\text{H NMR}$  (500 MHz,  $\text{CDCl}_3$ ):  $\delta = 7.34\text{--}7.22$  (m, 8H), 7.09–7.07 (m, 2H), 6.75 (dt,  $J = 15.0, 7.5$  Hz, 1H), 6.19 (dt,  $J = 15.5, 1.0$  Hz, 1H), 4.31–4.24 (m, 2H), 4.20 (s, 2H), 3.62 (d,  $J = 14.0$  Hz, 1H), 3.50 (d,  $J = 14.5$  Hz, 1H), 2.92–2.90 (m, 2H), 1.26 (t,  $J = 7.0$  Hz, 3H) ppm.  $^{13}\text{C NMR}$  (125 MHz,  $\text{CDCl}_3$ ):  $\delta = 188.51, 165.76, 137.29, 135.55, 133.09, 132.53, 130.03, 129.08, 129.05, 128.83, 128.35, 127.56, 95.38, 63.43, 40.24, 36.12, 33.35, 13.97$  ppm. HRMS (ESI)  $m/z$  calcd for  $\text{C}_{22}\text{H}_{23}\text{NNaO}_6\text{S}$   $[\text{M}+\text{Na}]^+$  452.1138, found 452.1139. The  $ee$  value was 63%,  $t_R$  (minor) = 15.161 min,  $t_R$  (major) = 22.561 min (Chiralpak IF,  $\lambda = 254$  nm, 2.5% *i*PrOH/hexane, flow rate = 1.0 mL/min).

**<Chromatogram>**

mV

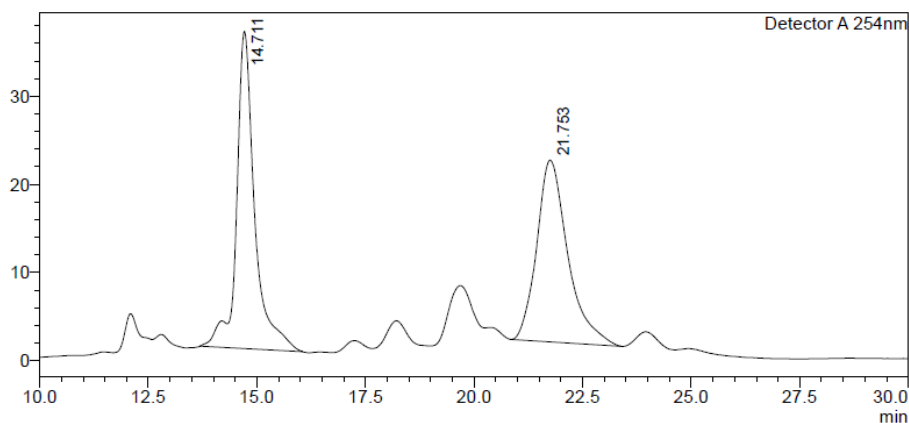**<Peak Table>**

Detector A 254nm

| Peak# | Ret. Time | Area    | Height | Area%   | Conc.  | Name |
|-------|-----------|---------|--------|---------|--------|------|
| 1     | 14.711    | 1041313 | 35976  | 50.355  | 50.355 |      |
| 2     | 21.753    | 1026630 | 20624  | 49.645  | 49.645 |      |
| Total |           | 2067942 | 56601  | 100.000 |        |      |

**<Chromatogram>**

mV

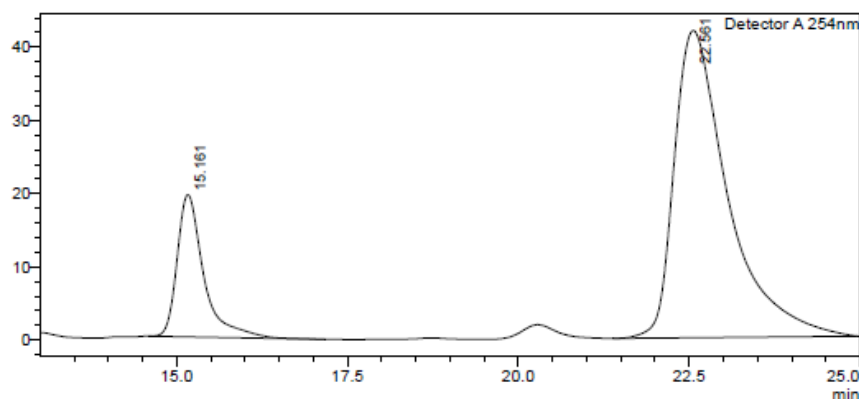**<Peak Table>**

Detector A 254nm

| Peak# | Ret. Time | Area    | Height | Area%   | Conc.  | Name |
|-------|-----------|---------|--------|---------|--------|------|
| 1     | 15.161    | 526888  | 19416  | 18.675  | 18.675 |      |
| 2     | 22.561    | 2294467 | 41953  | 81.325  | 81.325 |      |
| Total |           | 2821356 | 61369  | 100.000 |        |      |

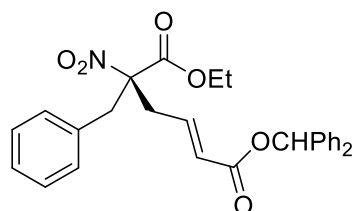**1-Benzhydryl****6-ethyl****(S,E)-5-benzyl-5-nitrohex-2-enedioate (3a-4)**

Colourless oil;  $[\alpha]_D^{25} = -4.1$  (c = 2.0, CHCl<sub>3</sub>); <sup>1</sup>H NMR (500 MHz, CDCl<sub>3</sub>):  $\delta = 7.36\text{--}7.28$  (m, 13H), 7.10–7.09 (m, 2H), 6.95 (s, 1H), 6.91 (dt, *J* = 15.0, 7.5 Hz, 1H), 6.07 (d, *J* = 15.5 Hz, 1H), 4.28–4.23 (m, 2H), 3.63 (d, *J* = 14.5 Hz, 1H), 3.51 (d, *J* = 14.5 Hz, 1H), 2.96 (d, *J* = 7.5 Hz, 2H), 1.23 (t, *J* = 7.5 Hz, 3H) ppm. <sup>13</sup>C NMR (125 MHz, CDCl<sub>3</sub>):  $\delta = 165.80, 164.49, 140.21, 140.10, 132.59, 130.04, 129.04, 128.68, 128.31, 128.15, 127.25, 127.24,$

126.71, 95.40, 77.37, 63.36, 40.22, 36.18, 13.92 ppm. HRMS (ESI)  $m/z$  calcd for  $C_{28}H_{27}NNaO_6$   $[M+Na]^+$  496.1731, found 496.1728. The *ee* value was 80%,  $t_R$  (minor) = 16.809 min,  $t_R$  (major) = 22.078 min (Chiralpak IC,  $\lambda$  = 254 nm, 2.5% *i*PrOH/hexane, flow rate = 1.0 mL/min).

<Chromatogram>

mV

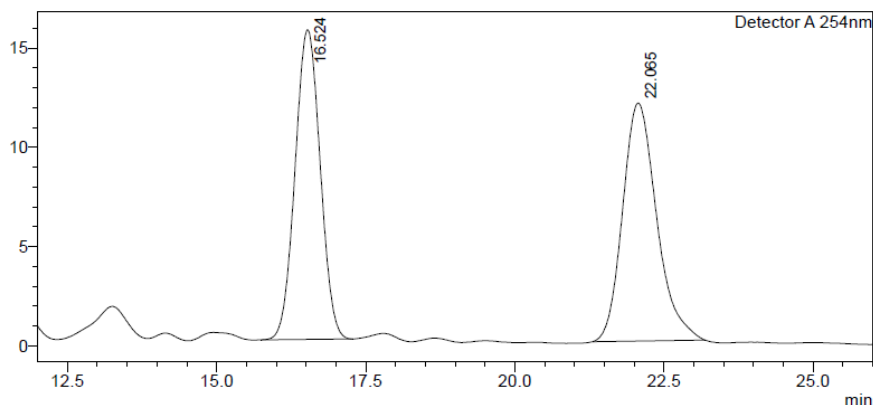

<Peak Table>

Detector A 254nm

| Peak# | Ret. Time | Area   | Height | Area%   | Conc.  | Name |
|-------|-----------|--------|--------|---------|--------|------|
| 1     | 16.524    | 457713 | 15608  | 49.016  | 49.016 |      |
| 2     | 22.065    | 476099 | 11992  | 50.984  | 50.984 |      |
| Total |           | 933813 | 27600  | 100.000 |        |      |

<Chromatogram>

mV

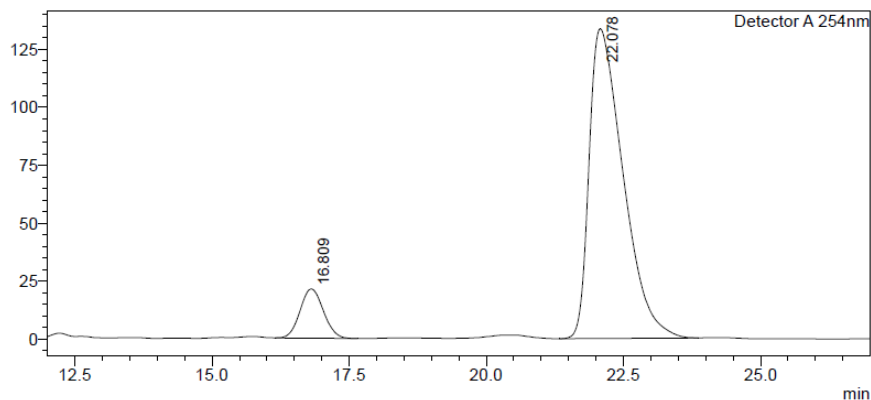

<Peak Table>

Detector A 254nm

| Peak# | Ret. Time | Area    | Height | Area%   | Conc.  | Name |
|-------|-----------|---------|--------|---------|--------|------|
| 1     | 16.809    | 629079  | 21244  | 9.858   | 9.858  |      |
| 2     | 22.078    | 5752404 | 133580 | 90.142  | 90.142 |      |
| Total |           | 6381483 | 154824 | 100.000 |        |      |

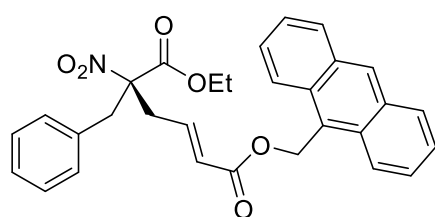

**1-(Anthracen-9-ylmethyl)**

**6-ethyl**

**(S,E)-5-benzyl-5-nitrohex-2-enedioate (3a-5)**

Pale yellow solid;  $[\alpha]_D^{25} = -4.7$  ( $c = 2.0$ ,  $CHCl_3$ );

$^1H$  NMR (500 MHz,  $CDCl_3$ ):  $\delta = 8.53$  (s, 1H),

8.35 (d,  $J = 9$  Hz, 2H), 8.04 (d,  $J = 8.5$  Hz, 2H), 7.61–7.58 (m, 2H), 7.52–7.49 (m,

2H), 7.26–7.25 (m, 3H), 7.05–7.03 (m, 2H), 6.84 (dt,  $J = 15.0, 7.5$  Hz, 1H), 6.24 (s, 2H), 5.95 (d,  $J = 15.5$  Hz, 1H), 4.23–4.16 (m, 2H), 3.58 (d,  $J = 14.0$  Hz, 1H), 3.45 (d,  $J = 14.5$  Hz, 1H), 2.89 (d,  $J = 7.5$  Hz, 2H), 1.15 (t,  $J = 7.5$  Hz, 3H). ppm.  $^{13}\text{C}$  NMR (125 MHz,  $\text{CDCl}_3$ ):  $\delta = 165.73, 165.65, 139.97, 132.54, 131.52, 131.21, 129.98, 129.46, 129.27, 128.99, 128.24, 126.85, 126.59, 126.08, 125.28, 124.03, 95.32, 63.31, 59.24, 40.02, 36.01, 13.82$  ppm. HRMS (ESI)  $m/z$  calcd for  $\text{C}_{30}\text{H}_{27}\text{NNaO}_6$   $[\text{M}+\text{Na}]^+$  520.1731, found 520.1736. The *ee* value was 83%,  $t_{\text{R}}$  (major) = 35.054 min,  $t_{\text{R}}$  (minor) = 32.562 min (Chiralpak IC,  $\lambda = 254$  nm, 2.5% *i*PrOH/hexane, flow rate = 1.0 mL/min).

<Chromatogram>

mV

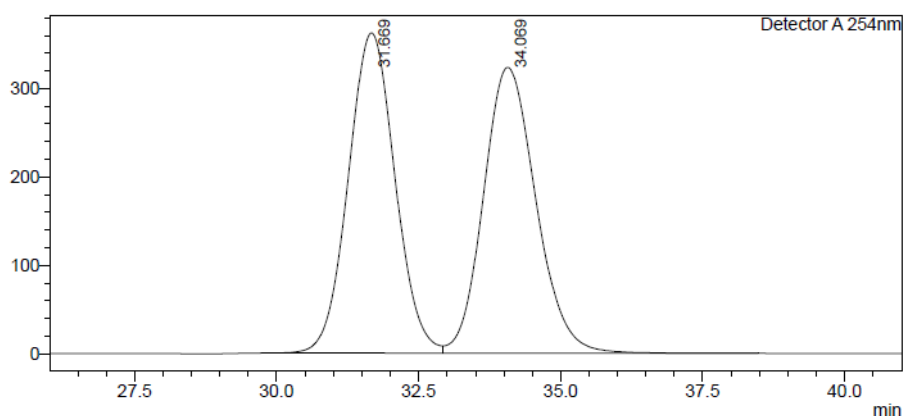

<Peak Table>

Detector A 254nm

| Peak# | Ret. Time | Area     | Height | Area%   | Conc.  | Name |
|-------|-----------|----------|--------|---------|--------|------|
| 1     | 31.669    | 20760269 | 362171 | 49.955  | 49.955 |      |
| 2     | 34.069    | 20797311 | 323392 | 50.045  | 50.045 |      |
| Total |           | 41557580 | 685563 | 100.000 |        |      |

<Chromatogram>

mV

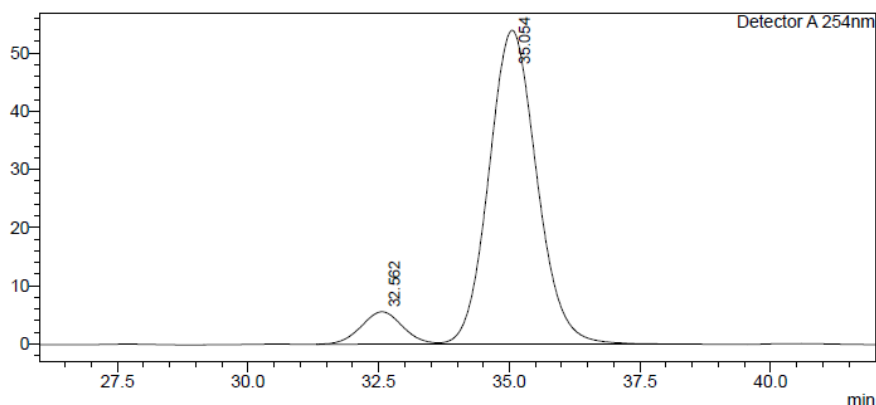

<Peak Table>

Detector A 254nm

| Peak# | Ret. Time | Area    | Height | Area%   | Conc.  | Name |
|-------|-----------|---------|--------|---------|--------|------|
| 1     | 32.562    | 307533  | 5556   | 8.220   | 8.220  |      |
| 2     | 35.054    | 3433724 | 53907  | 91.780  | 91.780 |      |
| Total |           | 3741257 | 59463  | 100.000 |        |      |

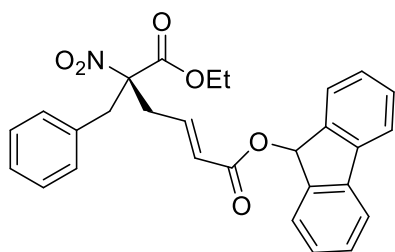

### 6-Ethyl

### 1-(9*H*-fluoren-9-yl)

### (*S,E*)-5-benzyl-5-nitrohex-2-enedioate (3a-6)

Colourless oil;  $[\alpha]_D^{25} = -5.5$  ( $c = 2.0$ ,  $\text{CHCl}_3$ );  $^1\text{H}$  NMR (500 MHz,  $\text{CDCl}_3$ ):  $\delta = 7.68$  (d,  $J = 7.5$  Hz, 2H), 7.56 (d,  $J = 7.5$  Hz, 2H), 7.43 (t,  $J = 7.5$  Hz,

2H), 7.31–7.28 (m, 5H), 7.10–7.08 (m, 2H), 6.92 (dt,  $J = 15.0$ , 7.5 Hz, 1H), 6.86 (s, 1H), 6.04 (d,  $J = 15.5$  Hz, 1H), 4.31–4.22 (m, 2H), 3.63 (d,  $J = 14.0$  Hz, 1H), 3.51 (d,  $J = 14.0$  Hz, 1H), 2.96 (d,  $J = 7.5$  Hz, 2H), 1.24 (t,  $J = 7.5$  Hz, 3H) ppm.  $^{13}\text{C}$  NMR (125 MHz,  $\text{CDCl}_3$ ):  $\delta = 166.18$ , 165.77, 142.00, 141.20, 140.39, 132.57, 130.04, 129.72, 129.05, 128.31, 128.03, 126.58, 126.11, 126.10, 120.20, 95.37, 75.55, 63.37, 40.17, 36.20, 13.94 ppm. HRMS (ESI)  $m/z$  calcd for  $\text{C}_{28}\text{H}_{25}\text{NNaO}_6$   $[\text{M}+\text{Na}]^+$  494.1574, found 494.1577. The  $ee$  value was 83%,  $t_R$  (major) = 9.039 min,  $t_R$  (minor) = 10.727 min (Chiralpak IA,  $\lambda = 254$  nm, 5.0%  $i\text{PrOH}$ /hexane, flow rate = 1.0 mL/min).

#### <Chromatogram>

mV

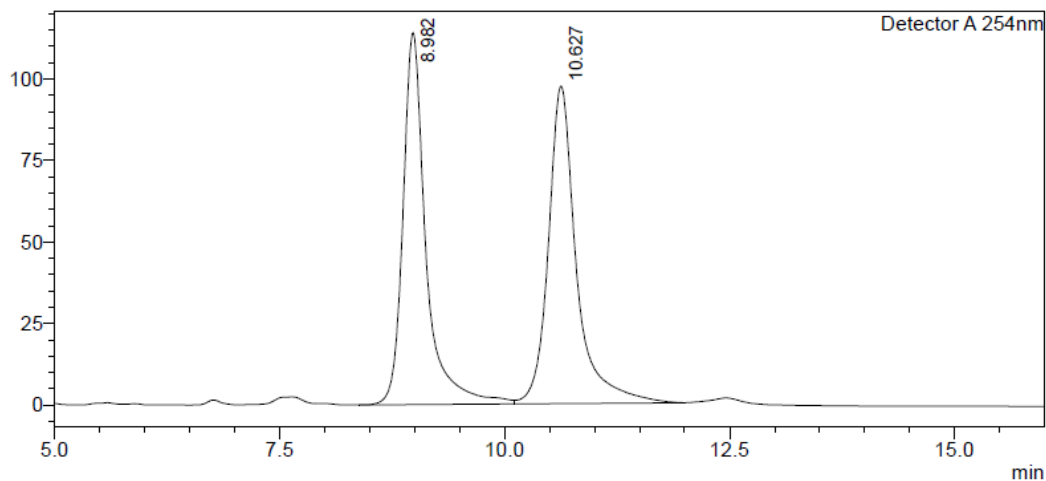

#### <Peak Table>

Detector A 254nm

| Peak# | Ret. Time | Area    | Height | Area%   | Conc.  | Name |
|-------|-----------|---------|--------|---------|--------|------|
| 1     | 8.982     | 2029242 | 114076 | 49.001  | 49.001 |      |
| 2     | 10.627    | 2111962 | 97395  | 50.999  | 50.999 |      |
| Total |           | 4141203 | 211471 | 100.000 |        |      |

**<Chromatogram>**

mV

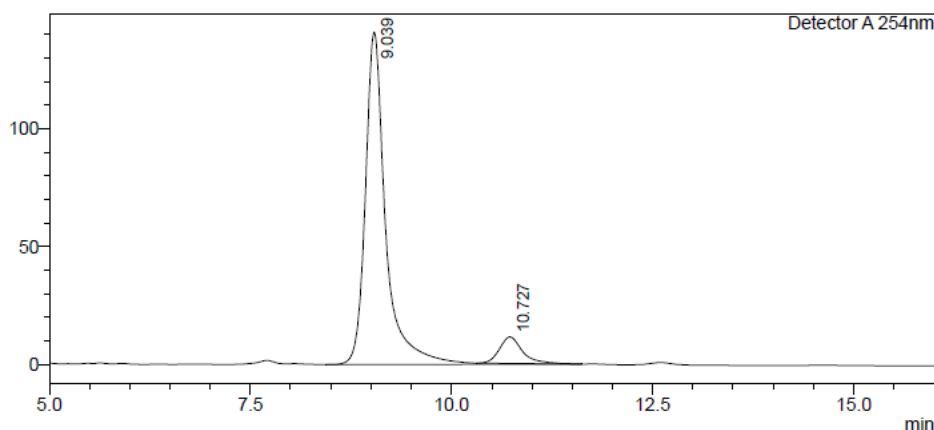**<Peak Table>**

Detector A 254nm

| Peak# | Ret. Time | Area    | Height | Area%   | Conc.  | Name |
|-------|-----------|---------|--------|---------|--------|------|
| 1     | 9.039     | 2489900 | 140837 | 91.736  | 91.736 |      |
| 2     | 10.727    | 224315  | 11197  | 8.264   | 8.264  |      |
| Total |           | 2714215 | 152034 | 100.000 |        |      |

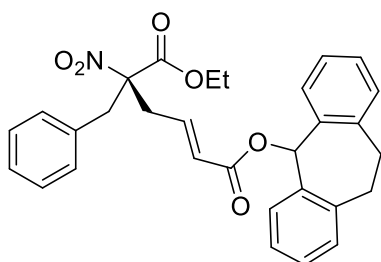**1-(10,11-Dihydro-5H-dibenzo[*a,d*][7]annulen-5-yl)****6-ethyl (S,E)-5-benzyl-5-nitrohex-2-enedioate  
(3a-7)**

Colourless oil;  $[\alpha]_D^{25} = -2.9$  ( $c = 2.0$ ,  $\text{CHCl}_3$ );  $^1\text{H}$  NMR (500 MHz,  $\text{CDCl}_3$ ):  $\delta = 7.44\text{--}7.43$  (m, 2H), 7.30–7.24 (m, 5H), 7.20–7.17 (m, 4H), 7.08–7.06 (m, 2H), 6.95 (s, 1H), 6.83 (dt,  $J = 15.0$ , 7.5 Hz, 1H), 5.98 (dt,  $J = 15.5$ , 1.0 Hz, 1H), 4.28–4.18 (m, 2H), 3.60 (d,  $J = 14.0$  Hz, 1H), 3.60–3.54 (m, 2H), 3.47 (d,  $J = 14.5$  Hz, 1H), 3.08–3.02 (m, 2H), 2.92 (dt,  $J = 8.0$ , 1.5 Hz, 2H), 1.19 (t,  $J = 7.0$  Hz, 1H) ppm.  $^{13}\text{C}$  NMR (125 MHz,  $\text{CDCl}_3$ ):  $\delta = 165.79$ , 164.31, 140.25, 139.78, 136.49, 132.57, 130.49, 130.01, 129.97, 129.01, 128.27, 126.99, 126.31, 95.35, 79.68, 63.34, 40.12, 36.06, 32.52, 13.85 ppm. HRMS (ESI)  $m/z$  calcd for  $\text{C}_{30}\text{H}_{29}\text{NNaO}_6$   $[\text{M}+\text{Na}]^+$  522.1887, found 522.1877. The *ee* value was 90%,  $t_R$  (major) = 18.458 min,  $t_R$  (minor) = 22.496 min (Chiralpak IC,  $\lambda = 220$  nm, 5.0% *i*PrOH/hexane, flow rate = 1.0 mL/min).

**<Chromatogram>**

mV

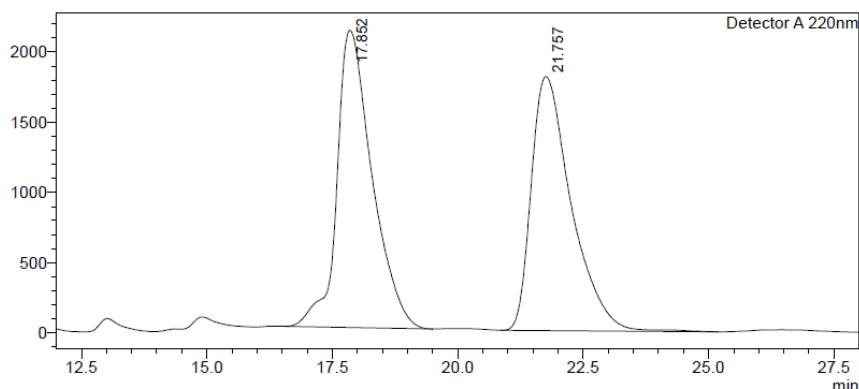**<Peak Table>**

Detector A 220nm

| Peak# | Ret. Time | Area      | Height  | Area%   | Conc.  | Name |
|-------|-----------|-----------|---------|---------|--------|------|
| 1     | 17.852    | 103623724 | 2115446 | 50.795  | 50.795 |      |
| 2     | 21.757    | 100380178 | 1808203 | 49.205  | 49.205 |      |
| Total |           | 204003902 | 3923649 | 100.000 |        |      |

**<Chromatogram>**

mV

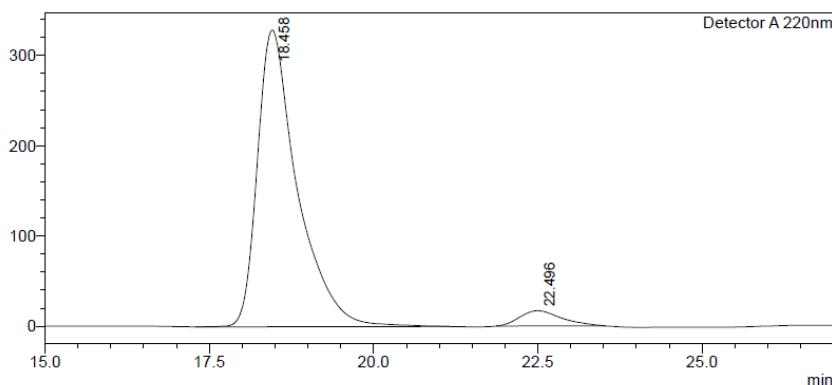**<Peak Table>**

Detector A 220nm

| Peak# | Ret. Time | Area     | Height | Conc.  | Unit | Mark | Height% | Area%   |
|-------|-----------|----------|--------|--------|------|------|---------|---------|
| 1     | 18.458    | 13899189 | 328840 | 94.859 |      | M    | 95.074  | 94.859  |
| 2     | 22.496    | 753334   | 17039  | 5.141  |      | M    | 4.926   | 5.141   |
| Total |           | 14652523 | 345879 |        |      |      | 100.000 | 100.000 |

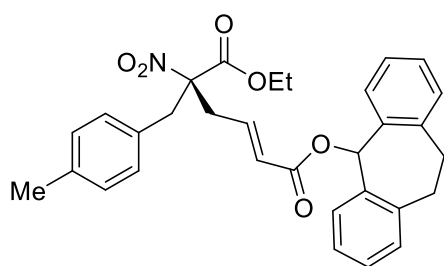

**1-(10,11-Dihydro-5H-dibenzo[a,d][7]annulen-5-yl) 6-ethyl (S,E)-5-(4-methylbenzyl)-5-nitrohex-2-enedioate (3b)**

Colourless oil;  $[\alpha]_D^{25} = -4.4$  ( $c = 2.0$ ,  $\text{CHCl}_3$ );  $^1\text{H NMR}$  (500 MHz,  $\text{CDCl}_3$ ):  $\delta = 7.44$  (d,  $J = 7.5$  Hz, 2H), 7.27–7.24 (m, 2H), 7.20–7.17 (m, 4H), 7.10 (d,  $J = 7.5$  Hz, 2H), 6.96–6.94 (m, 3H), 6.83 (dt,  $J = 15.0, 7.5$  Hz, 1H), 5.97 (d,  $J = 15.5$  Hz, 1H), 4.26–4.20 (m, 2H), 3.60–3.54 (m, 2H), 3.57 (d,  $J = 14.5$  Hz, 1H), 3.43 (d,  $J = 14.5$  Hz, 1H), 3.08–3.02 (m, 2H), 2.92–2.90 (m, 2H), 2.31 (s, 3H), 1.20 (t,  $J = 7.0$  Hz, 3H) ppm.  $^{13}\text{C}$

NMR (125 MHz, CDCl<sub>3</sub>):  $\delta$  = 165.84, 164.33, 140.23, 139.90, 138.04, 136.49, 130.48, 129.96, 129.84, 129.70, 129.38, 128.99, 126.91, 126.30, 95.40, 79.64, 63.28, 39.73, 35.98, 32.51, 21.18, 13.86 ppm. HRMS (ESI)  $m/z$  calcd for C<sub>31</sub>H<sub>31</sub>NNaO<sub>6</sub> [M+Na]<sup>+</sup> 536.2044, found 536.2036. The *ee* value was 90%,  $t_R$  (major) = 9.987 min,  $t_R$  (minor) = 11.792 min (Chiralpak IA,  $\lambda$  = 220 nm, 5.0% *i*PrOH/hexane, flow rate = 1.0 mL/min).

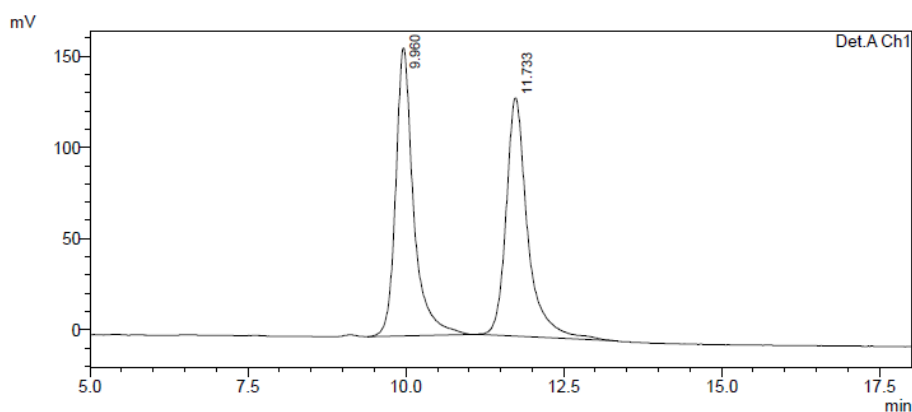

PeakTable

Detector A Ch1 220nm

| Peak# | Ret. Time | Area    | Height | Area %  | Height % |
|-------|-----------|---------|--------|---------|----------|
| 1     | 9.960     | 3118924 | 157876 | 50.164  | 54.703   |
| 2     | 11.733    | 3098548 | 130731 | 49.836  | 45.297   |
| Total |           | 6217473 | 288607 | 100.000 | 100.000  |

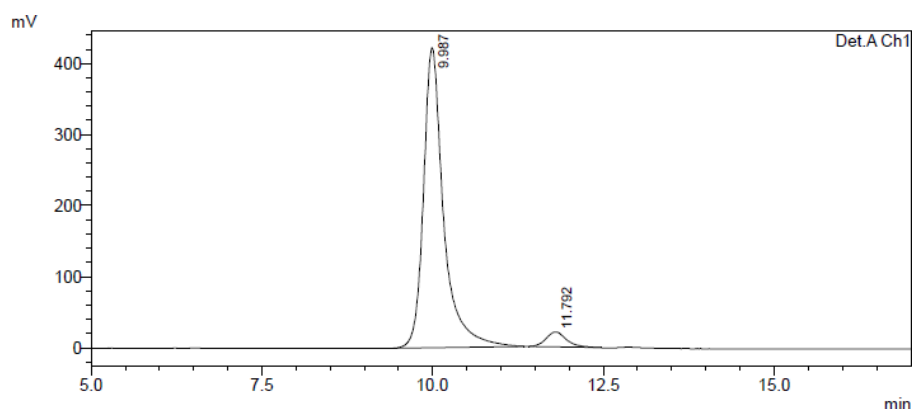

PeakTable

Detector A Ch1 220nm

| Peak# | Ret. Time | Area    | Height | Area %  | Height % |
|-------|-----------|---------|--------|---------|----------|
| 1     | 9.987     | 8665485 | 421992 | 95.263  | 95.290   |
| 2     | 11.792    | 430898  | 20859  | 4.737   | 4.710    |
| Total |           | 9096382 | 442851 | 100.000 | 100.000  |

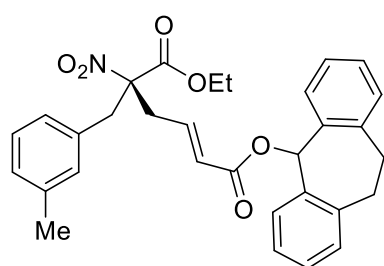

**1-(10,11-Dihydro-5H-dibenzo[*a,d*][7]annulen-5-yl)  
6-ethyl (*S,E*)-5-(3-methylbenzyl)-5-nitrohex-2-enedioate (3c)**

Colourless oil;  $[\alpha]_D^{25}$  = -5.3 ( $c$  = 2.0, CHCl<sub>3</sub>); <sup>1</sup>H NMR (500 MHz, CDCl<sub>3</sub>):  $\delta$  = 7.40–7.43 (m, 2H),



7.27–7.24 (m, 2H), 7.20–7.16 (m, 5H), 7.09 (d,  $J = 7.5$  Hz, 1H), 6.95 (s, 1H), 6.87–6.80 (m, 3H), 5.96 (d,  $J = 15.5$  Hz, 1H), 4.26–4.20 (m, 2H), 3.60–3.53 (m, 2H), 3.56 (d,  $J = 14.5$  Hz, 1H), 3.44 (d,  $J = 14.5$  Hz, 1H), 3.08–3.02 (m, 2H), 2.91 (d,  $J = 7.5$  Hz, 2H), 2.29 (s, 3H), 1.20 (t,  $J = 7.0$  Hz, 3H) ppm.  $^{13}\text{C}$  NMR (125 MHz,  $\text{CDCl}_3$ ):  $\delta = 165.84, 164.33, 140.23, 139.89, 138.69, 136.50, 132.45, 130.73, 130.49, 129.94, 129.01, 128.99, 128.87, 127.02, 126.96, 126.31, 95.39, 79.64, 63.30, 40.05, 36.09, 32.52, 21.45, 13.87$  ppm. HRMS (ESI)  $m/z$  calcd for  $\text{C}_{31}\text{H}_{31}\text{NNaO}_6$   $[\text{M}+\text{Na}]^+$  536.2044, found 536.2049. The  $ee$  value was 89%,  $t_R$  (major) = 8.457 min,  $t_R$  (minor) = 10.187 min (Chiralpak IA,  $\lambda = 220$  nm, 5.0%  $i\text{PrOH}$ /hexane, flow rate = 1.0 mL/min).

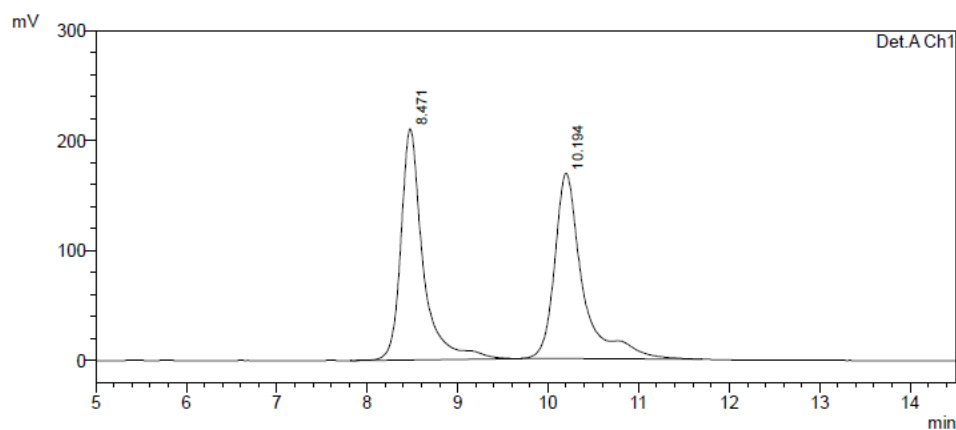

1 Det.A Ch1/220nm

PeakTable

Detector A Ch1 220nm

| Peak# | Ret. Time | Area    | Height | Area %  | Height % |
|-------|-----------|---------|--------|---------|----------|
| 1     | 8.471     | 3572107 | 210350 | 49.270  | 55.447   |
| 2     | 10.194    | 3678008 | 169021 | 50.730  | 44.553   |
| Total |           | 7250115 | 379372 | 100.000 | 100.000  |

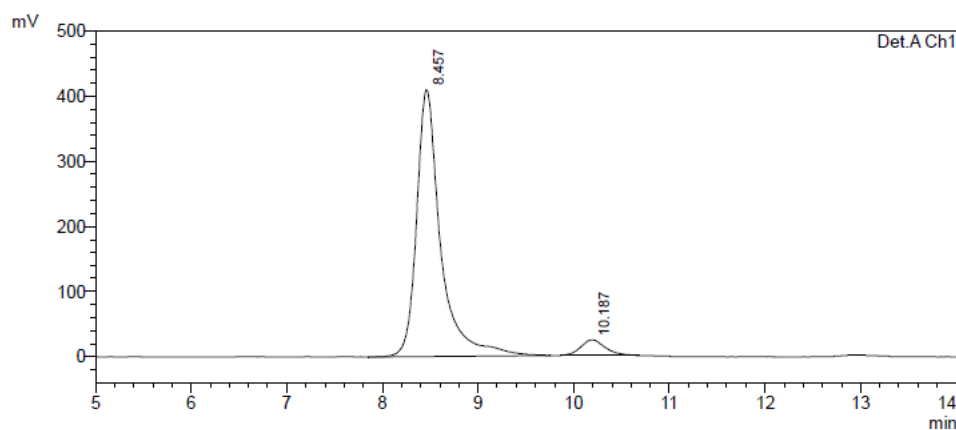

1 Det.A Ch1/220nm

PeakTable

Detector A Ch1 220nm

| Peak# | Ret. Time | Area    | Height | Area %  | Height % |
|-------|-----------|---------|--------|---------|----------|
| 1     | 8.457     | 7146978 | 409594 | 94.504  | 94.549   |
| 2     | 10.187    | 415653  | 23614  | 5.496   | 5.451    |
| Total |           | 7562630 | 433208 | 100.000 | 100.000  |

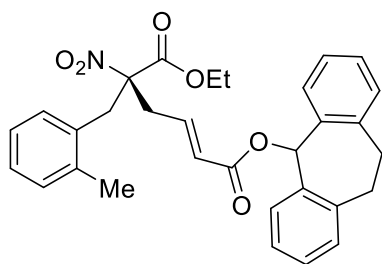

**1-(10,11-Dihydro-5H-dibenzo[*a,d*][7]annulen-5-yl)  
6-ethyl (*S,E*)-5-(2-methylbenzyl)-5-nitrohex-2-enedioate (3d)**

Colourless oil;  $[\alpha]_D^{25} = -6.9$  ( $c = 2.0$ ,  $\text{CHCl}_3$ );  $^1\text{H}$  NMR (500 MHz,  $\text{CDCl}_3$ ):  $\delta = 7.42$  (d,  $J = 7.5$  Hz, 2H),

7.26–7.23 (m, 2H), 7.20–7.09 (m, 7H), 6.99 (d,  $J = 7.5$  Hz, 1H), 6.94 (s, 1H), 6.83 (dt,  $J = 15.0, 7.5$  Hz, 1H), 5.91 (d,  $J = 15.5$  Hz, 1H), 4.25–4.14 (m, 2H), 3.69–3.61 (m, 2H), 3.58–3.52 (m, 2H), 3.07–3.01 (m, 2H), 2.99–2.90 (m, 2H), 2.26 (s, 3H), 1.15 (t,  $J = 7.0$  Hz, 3H) ppm.  $^{13}\text{C}$  NMR (125 MHz,  $\text{CDCl}_3$ ):  $\delta = 166.12, 164.27, 140.20, 140.06, 137.49, 136.52, 131.25, 131.20, 130.46, 130.10, 129.88, 128.95, 128.11, 126.67, 126.44, 126.29, 95.59, 79.50, 63.33, 36.81, 36.64, 32.52, 19.90, 13.76$  ppm. HRMS (ESI)  $m/z$  calcd for  $\text{C}_{31}\text{H}_{31}\text{NNaO}_6$   $[\text{M}+\text{Na}]^+$  536.2044, found 536.2041. The *ee* value was 90%,  $t_R$  (major) = 9.124 min,  $t_R$  (minor) = 10.771 min (Chiralpak IA,  $\lambda = 220$  nm, 5.0% *i*PrOH/hexane, flow rate = 1.0 mL/min).

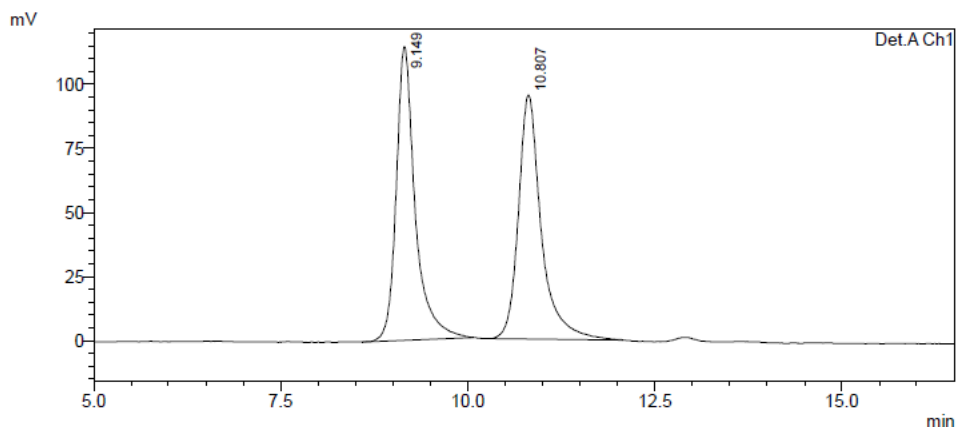

1 Det.A Ch1/220nm

PeakTable

| Peak# | Ret. Time | Area    | Height | Area %  | Height % |
|-------|-----------|---------|--------|---------|----------|
| 1     | 9.149     | 2029311 | 114503 | 50.032  | 54.585   |
| 2     | 10.807    | 2026690 | 95267  | 49.968  | 45.415   |
| Total |           | 4056001 | 209769 | 100.000 | 100.000  |

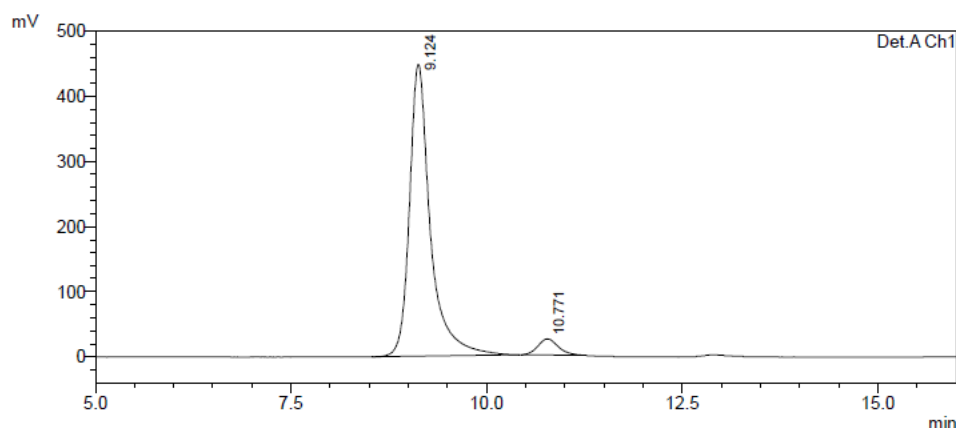

1 Det.A Ch1/220nm

PeakTable

Detector A Ch1 220nm

| Peak# | Ret. Time | Area    | Height | Area %  | Height % |
|-------|-----------|---------|--------|---------|----------|
| 1     | 9.124     | 8336038 | 448196 | 94.910  | 94.770   |
| 2     | 10.771    | 447017  | 24732  | 5.090   | 5.230    |
| Total |           | 8783055 | 472928 | 100.000 | 100.000  |

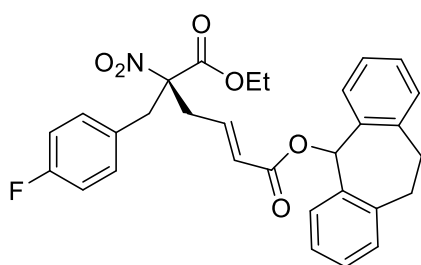

**1-(10,11-Dihydro-5H-dibenzo[a,d][7]annulen-5-yl) 6-ethyl (S,E)-5-(4-fluorobenzyl)-5-nitrohex-2-enedioate (3e)**

Colourless oil;  $[\alpha]_D^{25} = -5.5$  ( $c = 2.0$ ,  $\text{CHCl}_3$ );  $^1\text{H}$  NMR (500 MHz,  $\text{CDCl}_3$ ):  $\delta = 7.44\text{--}7.42$  (m, 2H),

7.27–7.24 (m, 2H), 7.19 (d,  $J = 7.0$  Hz, 4H), 7.06–7.03 (m, 2H), 7.00–6.96 (m, 2H), 6.94 (s, 1H), 6.80 (dt,  $J = 15.0, 7.5$  Hz, 1H), 5.98 (d,  $J = 15.5$  Hz, 1H), 4.26–4.19 (m, 2H), 3.60–3.65 (m, 2H), 3.56 (d,  $J = 14.5$  Hz, 1H), 3.43 (d,  $J = 14.5$  Hz, 1H), 3.07–3.01 (m, 2H), 2.96–2.86 (m, 2H), 1.19 (t,  $J = 7.0$  Hz, 3H) ppm.  $^{13}\text{C}$  NMR (125 MHz,  $\text{CDCl}_3$ ):  $\delta = 165.67, 164.27, 162.29$  (d,  $J = 246.3$  Hz), 140.29, 139.51, 136.43, 131.66 (d,  $J = 8.8$  Hz), 130.50, 130.05 (d,  $J = 1.3$  Hz), 129.04, 128.08, 127.12, 126.33, 116.00 (d,  $J = 21.3$  Hz), 95.21, 79.82, 63.43, 39.36, 36.09, 32.53, 13.86 ppm. HRMS (ESI)  $m/z$  calcd for  $\text{C}_{30}\text{H}_{28}\text{FNNaO}_6$   $[\text{M}+\text{Na}]^+$  540.1793, found 540.1792. The *ee* value was 87%,  $t_R$  (major) = 13.152 min,  $t_R$  (minor) = 15.077 min (Chiralpak IC,  $\lambda = 220$  nm, 5.0% *i*PrOH/hexane, flow rate = 1.0 mL/min).

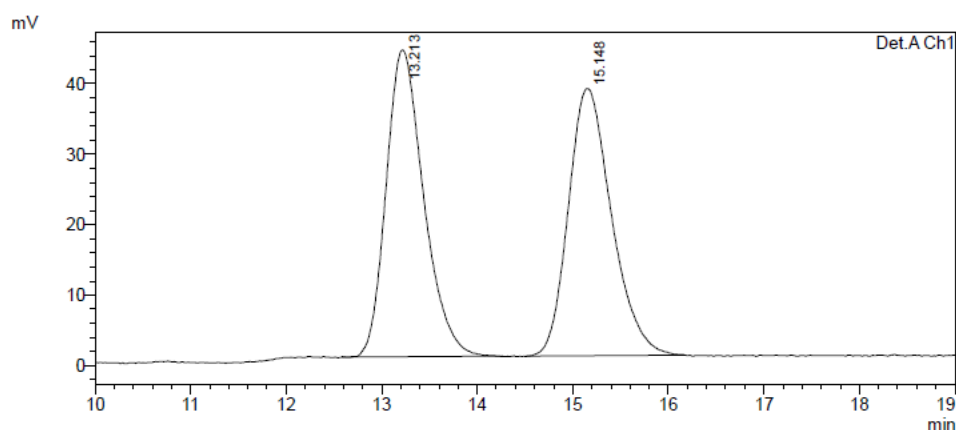

PeakTable

| Peak# | Ret. Time | Area    | Height | Area %  | Height % |
|-------|-----------|---------|--------|---------|----------|
| 1     | 13.213    | 1193400 | 43543  | 50.050  | 53.426   |
| 2     | 15.148    | 1190995 | 37958  | 49.950  | 46.574   |
| Total |           | 2384395 | 81501  | 100.000 | 100.000  |

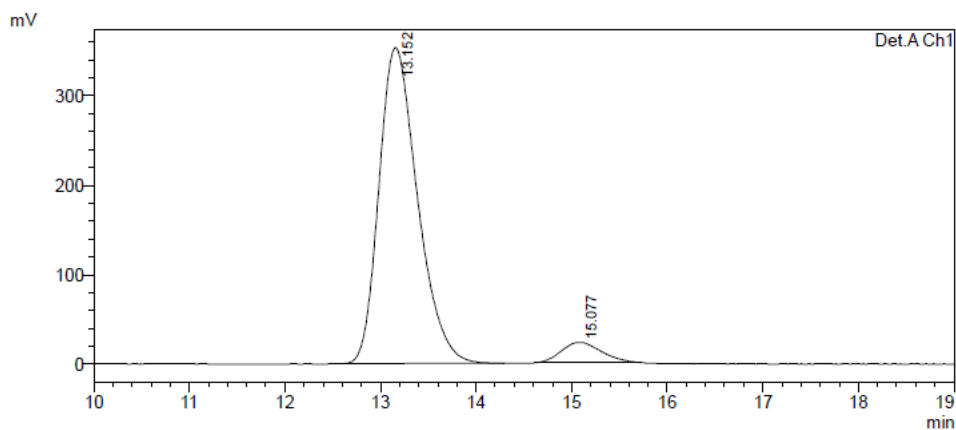

PeakTable

| Peak# | Ret. Time | Area     | Height | Area %  | Height % |
|-------|-----------|----------|--------|---------|----------|
| 1     | 13.152    | 9922485  | 353510 | 93.687  | 93.940   |
| 2     | 15.077    | 668616   | 22806  | 6.313   | 6.060    |
| Total |           | 10591101 | 376316 | 100.000 | 100.000  |

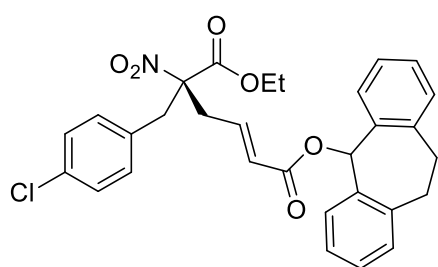

**1-(10,11-Dihydro-5H-dibenzo[*a,d*][7]annulen-5-yl) 6-ethyl (*S,E*)-5-(4-chlorobenzyl)-5-nitrohex-2-enedioate (3f)**

Colourless oil;  $[\alpha]_D^{25} = -1.5$  ( $c = 2.0$ ,  $\text{CHCl}_3$ );  $^1\text{H}$  NMR (500 MHz,  $\text{CDCl}_3$ ):  $\delta = 7.43$  (d,  $J = 7.5$  Hz,

2H), 7.26–7.25 (m, 4H), 7.19 (d,  $J = 7.5$  Hz, 4H), 7.00 (d,  $J = 8.5$  Hz, 2H), 6.95 (s, 1H), 6.80 (dt,  $J = 15.0, 7.5$  Hz, 1H), 5.98 (d,  $J = 15.5$  Hz, 1H), 4.27–4.20 (m, 2H), 3.60–3.55 (m, 2H), 3.56 (d,  $J = 14.5$  Hz, 1H), 3.43 (d,  $J = 14.5$  Hz, 1H), 3.08–3.02 (m, 2H), 2.96–2.86 (m, 2H), 1.19 (t,  $J = 7.0$  Hz, 3H) ppm.  $^{13}\text{C}$  NMR (125 MHz,  $\text{CDCl}_3$ ):  $\delta = 165.58, 164.25, 140.29, 139.40, 136.42, 134.42, 131.34, 130.50, 130.05, 129.22,$

129.04, 128.08, 127.18, 126.32, 95.08, 79.84, 63.48, 39.47, 36.10, 32.53, 13.86 ppm.  
 HRMS (ESI)  $m/z$  calcd for  $C_{30}H_{28}^{35}ClNaO_6 [M+Na]^+$  556.1497, found 556.1487,  
 $C_{30}H_{28}^{37}ClNaO_6 [M+Na]^+$  557.1531, found 557.1538. The *ee* value was 86%,  $t_R$   
 (major) = 14.471 min,  $t_R$  (minor) = 17.427 min (Chiralpak IA,  $\lambda = 220$  nm, 5.0%  
*i*PrOH/hexane, flow rate = 1.0 mL/min).

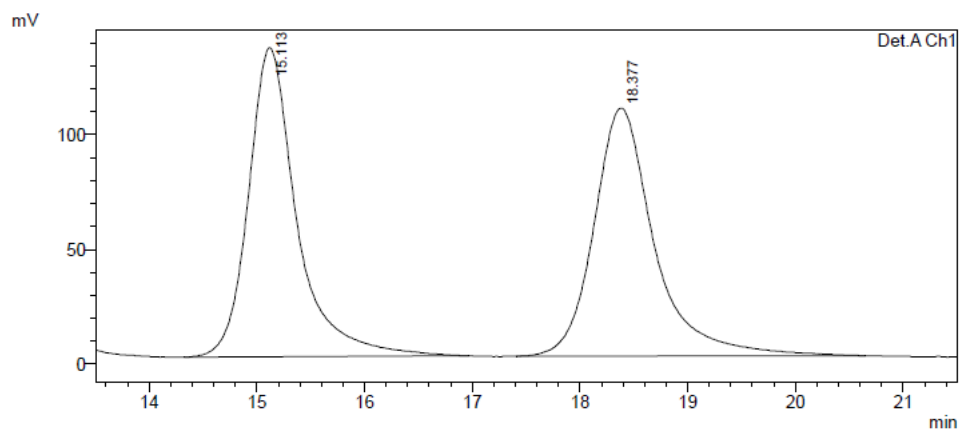

1 Det.A Ch1/220nm

PeakTable

Detector A Ch1 220nm

| Peak# | Ret. Time | Area    | Height | Area %  | Height % |
|-------|-----------|---------|--------|---------|----------|
| 1     | 15.113    | 4223399 | 134715 | 49.973  | 55.487   |
| 2     | 18.377    | 4227895 | 108070 | 50.027  | 44.513   |
| Total |           | 8451294 | 242785 | 100.000 | 100.000  |

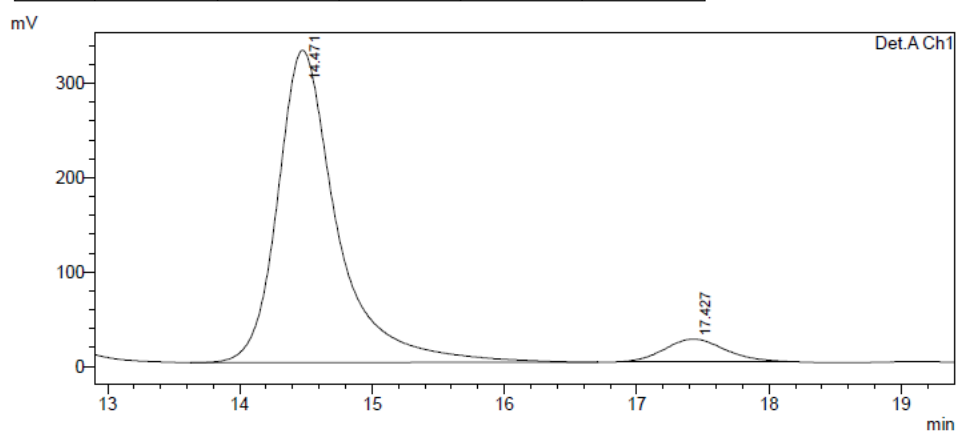

1 Det.A Ch1/220nm

PeakTable

Detector A Ch1 220nm

| Peak# | Ret. Time | Area     | Height | Area %  | Height % |
|-------|-----------|----------|--------|---------|----------|
| 1     | 14.471    | 10413879 | 331131 | 93.193  | 93.243   |
| 2     | 17.427    | 760665   | 23997  | 6.807   | 6.757    |
| Total |           | 11174544 | 355128 | 100.000 | 100.000  |

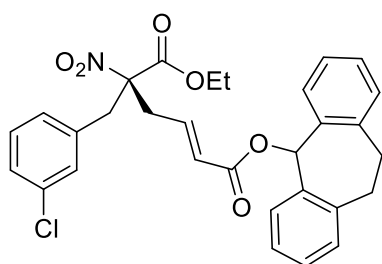

**1-(10,11-Dihydro-5H-dibenzo[*a,d*][7]annulen-5-yl)  
 6-ethyl (*S,E*)-5-(3-chlorobenzyl)-5-nitrohex-2-  
 enedioate (3g)**

Colourless oil;  $[\alpha]_D^{25} = -6.3$  ( $c = 2.0$ ,  $CHCl_3$ );  $^1H$   
 NMR (500 MHz,  $CDCl_3$ ):  $\delta = 7.44-7.42$  (m, 2H),

7.27–7.22 (m, 4H), 7.19 (d,  $J = 7.0$  Hz, 4H), 7.08 (s, 1H), 6.96 (d,  $J = 7.5$  Hz, 1H), 6.94 (s, 1H), 6.79 (dt,  $J = 15.0, 7.5$  Hz, 1H), 5.98 (d,  $J = 15.5$  Hz, 1H), 4.28–4.19 (m, 2H), 3.60–3.55 (m, 2H), 3.55 (d,  $J = 14.5$  Hz, 1H), 3.45 (d,  $J = 14.5$  Hz, 1H), 3.07–3.02 (m, 2H), 2.92 (d,  $J = 7.5$  Hz, 2H), 1.20 (t,  $J = 7.0$  Hz, 3H). ppm.  $^{13}\text{C}$  NMR (125 MHz,  $\text{CDCl}_3$ ):  $\delta = 165.53, 164.23, 140.27, 139.34, 136.45, 134.83, 134.59, 130.50, 130.26, 130.19, 130.00, 129.02, 128.55, 128.19, 127.25, 126.32, 95.05, 79.78, 63.53, 39.70, 36.24, 32.53, 13.86$  ppm. HRMS (ESI)  $m/z$  calcd for  $\text{C}_{30}\text{H}_{28}^{35}\text{ClNNaO}_6$   $[\text{M}+\text{Na}]^+$  556.1497, found 556.1501,  $\text{C}_{30}\text{H}_{28}^{37}\text{ClNNaO}_6$   $[\text{M}+\text{Na}]^+$  557.1531, found 557.1528. The *ee* value was 87%,  $t_{\text{R}}$  (minor) = 13.456 min,  $t_{\text{R}}$  (major) = 15.758 min (Chiralpak IF,  $\lambda = 220$  nm, 5.0% *i*PrOH/hexane, flow rate = 1.0 mL/min).

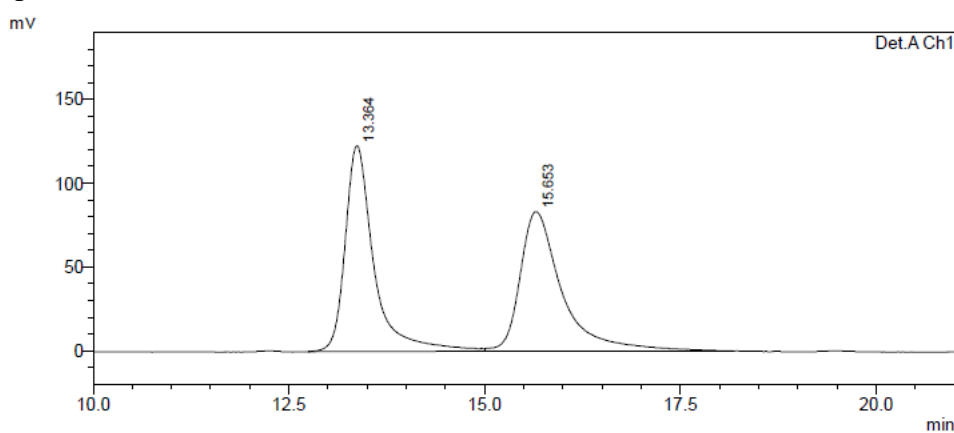

1 Det.A Ch1/220nm

PeakTable

Detector A Ch1 220nm

| Peak# | Ret. Time | Area    | Height | Area %  | Height % |
|-------|-----------|---------|--------|---------|----------|
| 1     | 13.364    | 3164540 | 122972 | 50.352  | 59.584   |
| 2     | 15.653    | 3120304 | 83413  | 49.648  | 40.416   |
| Total |           | 6284844 | 206385 | 100.000 | 100.000  |

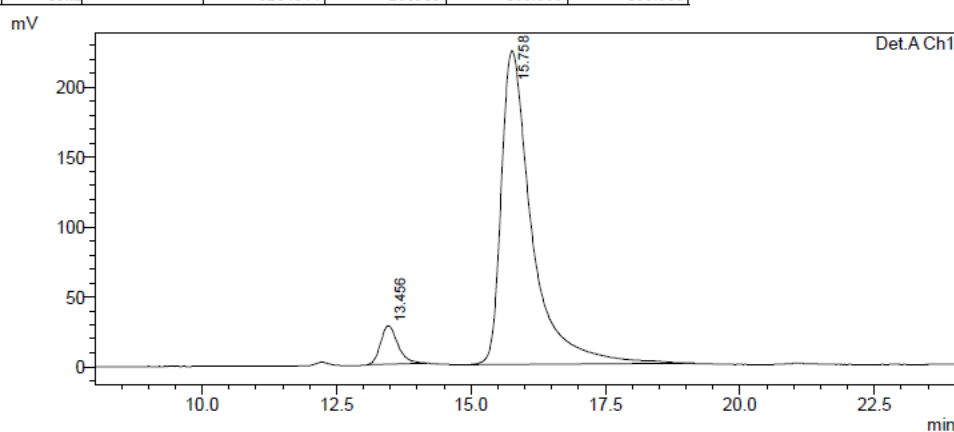

1 Det.A Ch1/220nm

PeakTable

Detector A Ch1 220nm

| Peak# | Ret. Time | Area    | Height | Area %  | Height % |
|-------|-----------|---------|--------|---------|----------|
| 1     | 13.456    | 616064  | 27527  | 6.457   | 10.924   |
| 2     | 15.758    | 8925456 | 224465 | 93.543  | 89.076   |
| Total |           | 9541520 | 251991 | 100.000 | 100.000  |

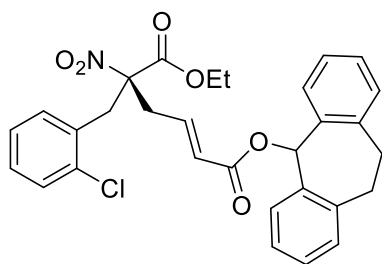

**1-(10,11-Dihydro-5H-dibenzo[*a,d*][7]annulen-5-yl)  
6-ethyl (*S,E*)-5-(2-chlorobenzyl)-5-nitrohex-2-  
enedioate (**3h**)**

Colourless oil;  $[\alpha]_D^{25} = -3.1$  ( $c = 2.0$ ,  $\text{CHCl}_3$ );  $^1\text{H}$   
NMR (500 MHz,  $\text{CDCl}_3$ ):  $\delta = 7.41$  (d,  $J = 8.0$  Hz, 2H),

7.36–7.34 (m, 1H), 7.26–7.23 (m, 2H), 7.20–7.15 (m, 6H), 7.12–7.10 (m, 1H), 6.93 (s, 1H), 6.87 (dt,  $J = 15.0, 7.5$  Hz, 1H), 5.92 (dt,  $J = 15.5, 1.5$  Hz, 1H), 4.26–4.16 (m, 2H), 3.87 (d,  $J = 15.0$  Hz, 1H), 3.74 (d,  $J = 15.0$  Hz, 1H), 3.58–3.51 (m, 2H), 3.07–3.01 (m, 2H), 2.97 (dt,  $J = 7.5, 1.5$  Hz, 2H), 1.15 (t,  $J = 7.0$  Hz, 3H).ppm.  $^{13}\text{C}$  NMR (125 MHz,  $\text{CDCl}_3$ ):  $\delta = 165.71, 164.27, 140.17, 140.10, 136.58, 135.36, 131.53, 131.05, 130.44, 130.13, 129.82, 129.67, 128.92, 127.47, 126.55, 126.28, 95.61, 79.37, 63.45, 37.07, 36.45, 32.52, 13.77$  ppm. HRMS (ESI)  $m/z$  calcd for  $\text{C}_{30}\text{H}_{28}^{35}\text{ClINNaO}_6$   $[\text{M}+\text{Na}]^+$  556.1497, found 556.1493,  $\text{C}_{30}\text{H}_{28}^{37}\text{ClINNaO}_6$   $[\text{M}+\text{Na}]^+$  557.1531, found 557.1531. The *ee* value was 81%,  $t_R$  (major) = 13.677 min,  $t_R$  (minor) = 20.152 min (Chiralpak IC,  $\lambda = 220$  nm, 5.0% *i*PrOH/hexane, flow rate = 1.0 mL/min).

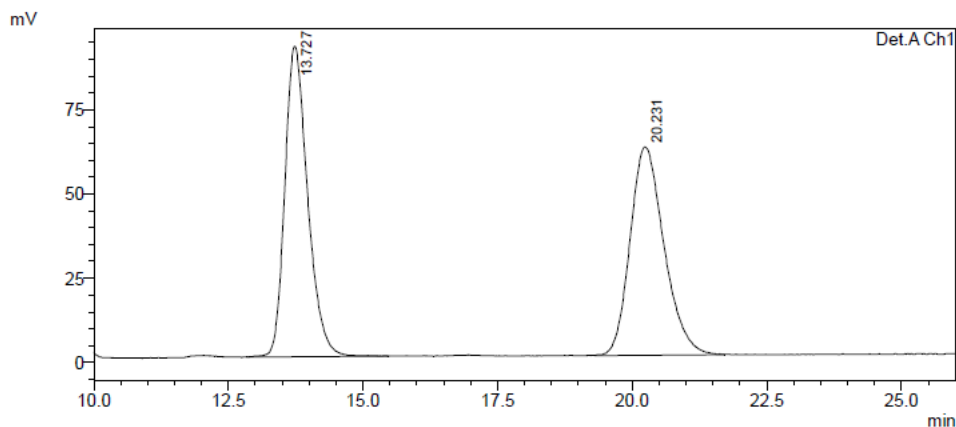

1 Det.A Ch1/220nm

PeakTable

| Peak# | Ret. Time | Area    | Height | Area %  | Height % |
|-------|-----------|---------|--------|---------|----------|
| 1     | 13.727    | 2724415 | 92080  | 50.121  | 59.826   |
| 2     | 20.231    | 2711304 | 61833  | 49.879  | 40.174   |
| Total |           | 5435719 | 153913 | 100.000 | 100.000  |

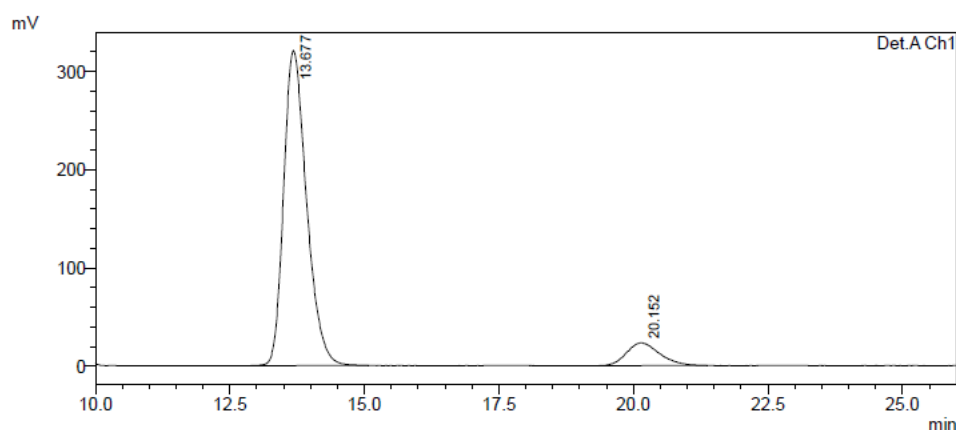

PeakTable

| Peak# | Ret. Time | Area     | Height | Area %  | Height % |
|-------|-----------|----------|--------|---------|----------|
| 1     | 13.677    | 9487178  | 320623 | 90.508  | 93.273   |
| 2     | 20.152    | 994917   | 23124  | 9.492   | 6.727    |
| Total |           | 10482094 | 343747 | 100.000 | 100.000  |

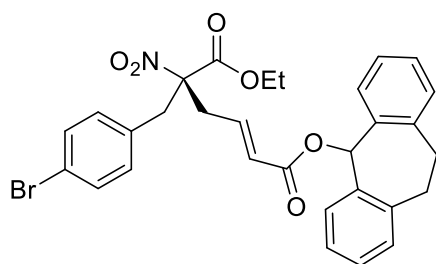

**1-(10,11-Dihydro-5H-dibenzo[*a,d*][7]annulen-5-yl) 6-ethyl (*S,E*)-5-(4-bromobenzyl)-5-nitrohex-2-enedioate (3i)**

Colourless oil;  $[\alpha]_D^{25} = -1.6$  ( $c = 2.0$ ,  $\text{CHCl}_3$ );  $^1\text{H}$  NMR (500 MHz,  $\text{CDCl}_3$ ):  $\delta = 7.56\text{--}7.55$  (m, 1H), 7.52–7.51 (m, 1H), 7.45–7.43 (m, 2H), 7.37–7.34 (m, 1H), 7.27–7.24 (m, 1H), 7.19 (d,  $J = 7.0$  Hz, 4H), 7.14 (d,  $J = 8.0$  Hz, 2H), 6.95 (s, 1H), 6.86 (dt,  $J = 15.5, 7.5$  Hz, 1H), 6.00 (d,  $J = 16.0$  Hz, 1H), 4.29–4.20 (m, 2H), 3.64 (d,  $J = 14.5$  Hz, 1H), 3.60–3.55 (m, 2H), 3.51 (d,  $J = 14.5$  Hz, 1H), 3.07–3.02 (m, 2H), 2.07–2.95 (m, 2H), 1.20 (t,  $J = 7.0$  Hz, 3H).ppm.  $^{13}\text{C}$  NMR (125 MHz,  $\text{CDCl}_3$ ):  $\delta = 165.81, 164.33, 141.19, 140.26, 139.78, 136.50, 131.51, 130.60, 129.99, 128.96, 128.09, 127.69, 127.17, 126.33, 95.35, 79.73, 63.40, 39.81, 36.13, 32.53, 13.89$  ppm. HRMS (ESI)  $m/z$  calcd for  $\text{C}_{30}\text{H}_{28}^{79}\text{BrNNaO}_6$   $[\text{M}+\text{Na}]^+$  600.0992, found 600.0996,  $\text{C}_{30}\text{H}_{28}^{81}\text{BrNNaO}_6$   $[\text{M}+\text{Na}]^+$  602.0972, found 602.0979. The *ee* value was 86%,  $t_R$  (minor) = 18.335 min,  $t_R$  (major) = 22.068 min (Chiralpak IC,  $\lambda = 220$  nm, 5.0% *i*PrOH/hexane, flow rate = 1.0 mL/min).



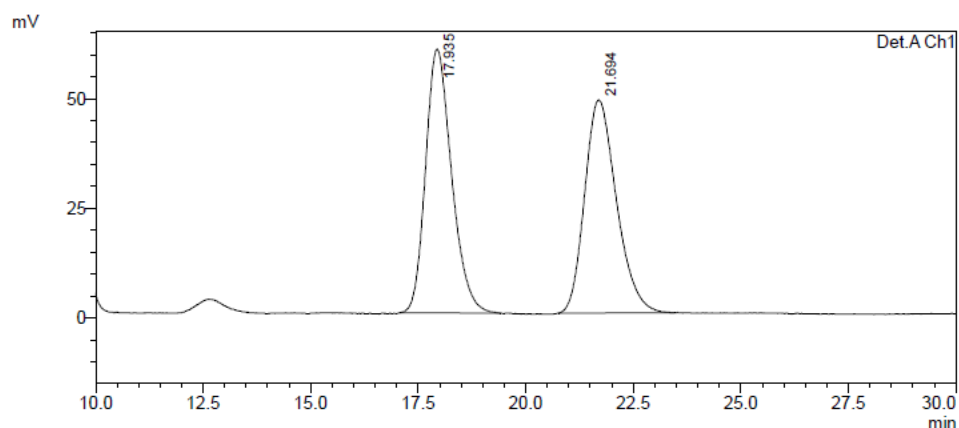

1 Det.A Ch1/220nm

PeakTable

Detector A Ch1 220nm

| Peak# | Ret. Time | Area    | Height | Area %  | Height % |
|-------|-----------|---------|--------|---------|----------|
| 1     | 17.935    | 2542231 | 60126  | 50.385  | 55.310   |
| 2     | 21.694    | 2503366 | 48581  | 49.615  | 44.690   |
| Total |           | 5045597 | 108706 | 100.000 | 100.000  |

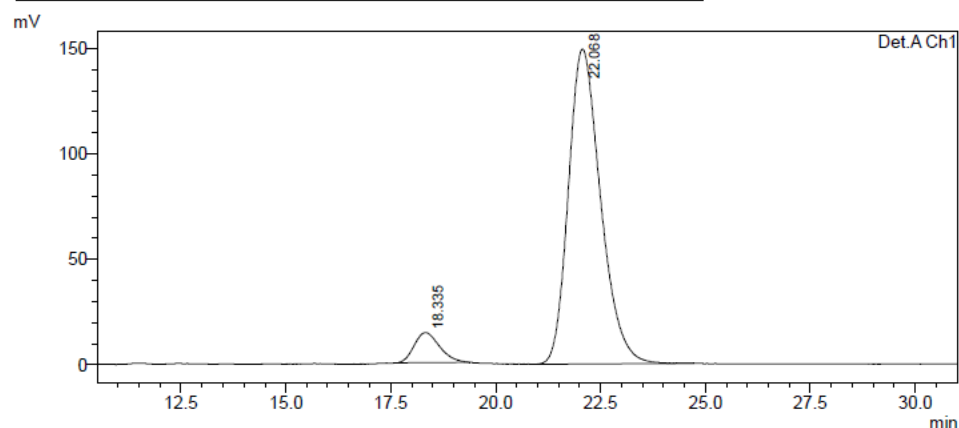

1 Det.A Ch1/220nm

PeakTable

Detector A Ch1 220nm

| Peak# | Ret. Time | Area    | Height | Area %  | Height % |
|-------|-----------|---------|--------|---------|----------|
| 1     | 18.335    | 591284  | 14157  | 6.901   | 8.665    |
| 2     | 22.068    | 7976990 | 149231 | 93.099  | 91.335   |
| Total |           | 8568274 | 163388 | 100.000 | 100.000  |

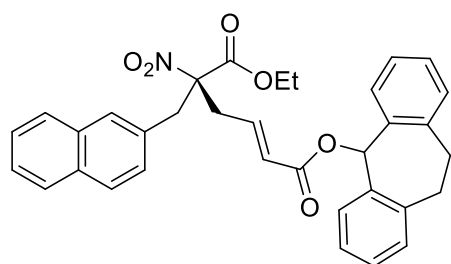

**1-(10,11-Dihydro-5H-dibenzo[a,d][7]annulen-5-yl) 6-ethyl (S,E)-5-(naphthalen-2-ylmethyl)-5-nitrohex-2-enedioate (3j)**

Colourless oil;  $[\alpha]_D^{25} = -3.8$  (c = 2.0, CHCl<sub>3</sub>); <sup>1</sup>H NMR (500 MHz, CDCl<sub>3</sub>):  $\delta = 7.77$  (d, *J* = 8.0 Hz,

1H), 7.56 (s, 1H), 7.50–7.44 (m, 4H), 7.28–7.25 (m, 2H), 7.21–7.15 (m, 7H), 6.97 (s, 1H), 6.89 (dt, *J* = 15.0, 7.5 Hz, 1H), 5.99 (d, *J* = 14.5 Hz, 1H), 4.25 (q, *J* = 7.0 Hz, 2H), 3.78 (d, *J* = 14.5 Hz, 1H), 3.65 (d, *J* = 14.5 Hz, 1H), 3.61–3.56 (m, 2H), 3.08–3.03 (m, 2H), 2.95 (d, *J* = 7.5 Hz, 2H), 1.19 (t, *J* = 7.0 Hz, 3H).ppm. <sup>13</sup>C NMR (125 MHz, CDCl<sub>3</sub>):  $\delta = 165.83, 164.33, 140.24, 139.78, 136.51, 133.40, 132.95, 130.50,$

129.96, 129.39, 129.01, 128.78, 128.07, 127.86, 127.77, 127.38, 127.10, 126.63, 126.51, 126.32, 95.41, 79.69, 63.40, 40.28, 36.20, 32.53, 13.88 ppm. HRMS (ESI)  $m/z$  calcd for  $C_{34}H_{31}NNaO_6$   $[M+Na]^+$  572.2044, found 572.2049. The *ee* value was 87%,  $t_R$  (major) = 16.090 min,  $t_R$  (minor) = 21.884 min (Chiralpak IA,  $\lambda$  = 220 nm, 5.0% *i*PrOH/hexane, flow rate = 1.0 mL/min).

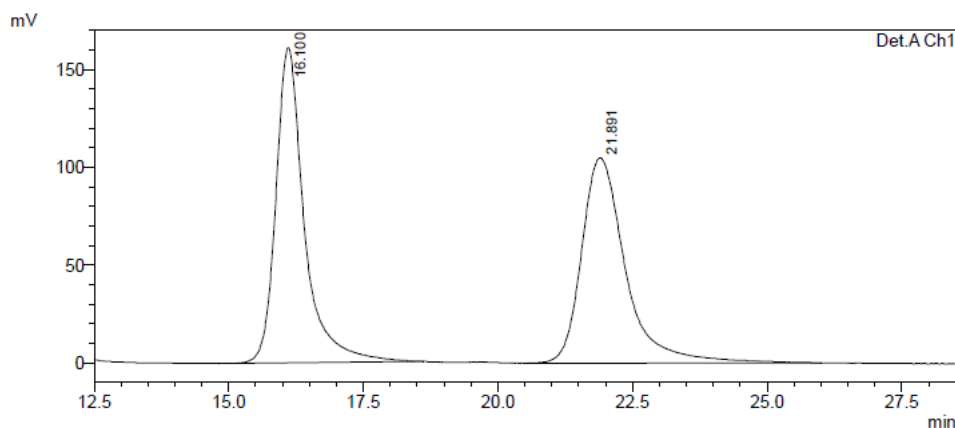

PeakTable

| Peak# | Ret. Time | Area     | Height | Area %  | Height % |
|-------|-----------|----------|--------|---------|----------|
| 1     | 16.100    | 5941399  | 160974 | 49.904  | 60.562   |
| 2     | 21.891    | 5964232  | 104827 | 50.096  | 39.438   |
| Total |           | 11905631 | 265801 | 100.000 | 100.000  |

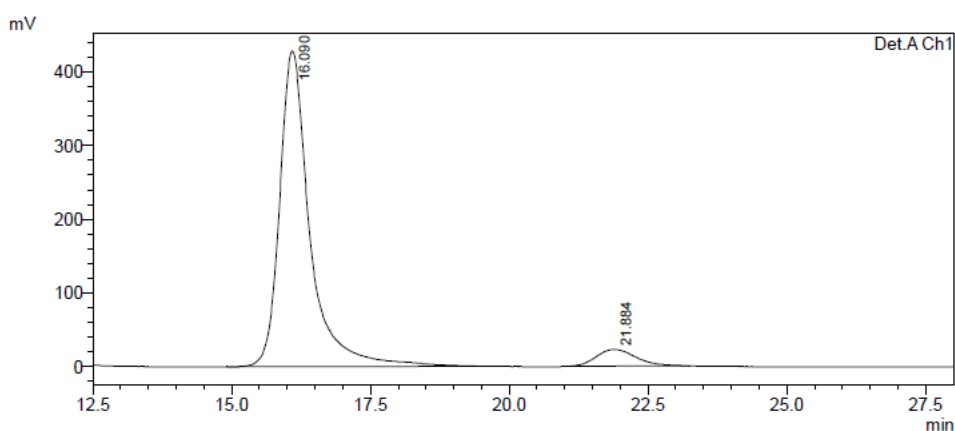

PeakTable

| Peak# | Ret. Time | Area     | Height | Area %  | Height % |
|-------|-----------|----------|--------|---------|----------|
| 1     | 16.090    | 16296595 | 428191 | 93.521  | 94.955   |
| 2     | 21.884    | 1129056  | 22748  | 6.479   | 5.045    |
| Total |           | 17425651 | 450939 | 100.000 | 100.000  |

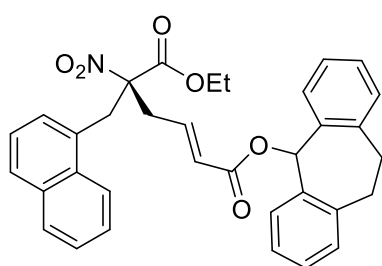

**1-(10,11-Dihydro-5H-dibenzo[*a,d*][7]annulen-5-yl)-6-ethyl (*S,E*)-5-(naphthalen-1-ylmethyl)-5-nitrohex-2-enedioate (3k)**

Colourless oil;  $[\alpha]_D^{25} = -2.8$  ( $c = 2.0$ ,  $CHCl_3$ );  $^1H$  NMR (500 MHz,  $CDCl_3$ ):  $\delta = 7.94-7.92$  (m, 1H),

7.83–7.81 (m, 1H), 7.75 (d,  $J = 8.5$  Hz, 1H), 7.48–7.40 (m, 3H), 7.37 (d,  $J = 8.0$  Hz, 1H), 7.28–7.22 (m, 2H), 7.21–7.16 (m, 6H), 6.93 (s, 1H), 6.80 (dt,  $J = 15.0, 7.5$  Hz, 1H), 5.79 (d,  $J = 15.5$  Hz, 1H), 4.15 (d,  $J = 15.0$  Hz, 1H), 4.15–4.06 (m, 2H), 4.02 (d,  $J = 15.0$  Hz, 1H), 3.57–3.52 (m, 2H), 3.06–3.01 (m, 2H), 2.90 (d,  $J = 7.0$  Hz, 2H), 1.08 (t,  $J = 7.0$  Hz, 3H).ppm.  $^{13}\text{C}$  NMR (125 MHz,  $\text{CDCl}_3$ ):  $\delta = 166.09, 164.26, 140.24, 139.94, 136.56, 134.05, 132.61, 130.46, 130.31, 129.93, 128.97, 128.51, 128.09, 127.19, 126.70, 126.59, 126.30, 126.06, 125.43, 123.24, 95.90, 79.48, 63.37, 36.81, 35.88, 32.54, 13.66$  ppm. HRMS (ESI)  $m/z$  calcd for  $\text{C}_{34}\text{H}_{31}\text{NNaO}_6$   $[\text{M}+\text{Na}]^+$  572.2044, found 572.2038. The *ee* value was 80%,  $t_{\text{R}}$  (major) = 10.549 min,  $t_{\text{R}}$  (minor) = 12.702 min (Chiralpak IA,  $\lambda = 220$  nm, 5.0% *i*PrOH/hexane, flow rate = 1.0 mL/min).

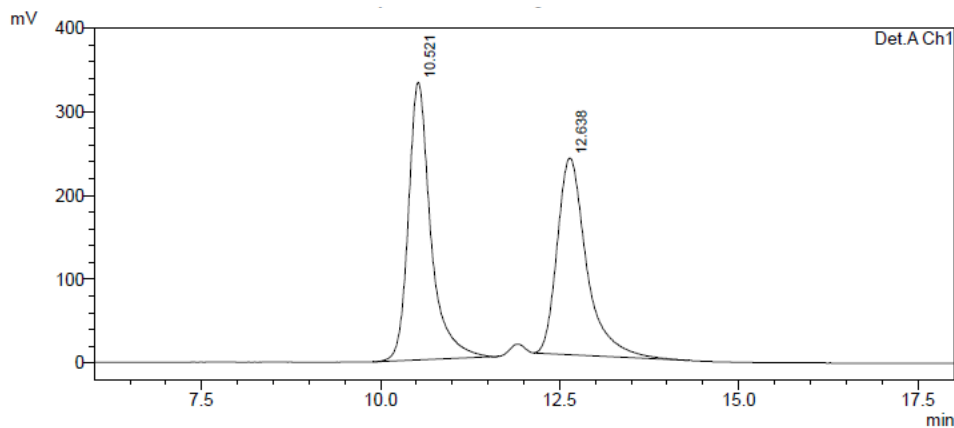

1 Det.A Ch1/220nm

PeakTable

Detector A Ch1 220nm

| Peak# | Ret. Time | Area     | Height | Area %  | Height % |
|-------|-----------|----------|--------|---------|----------|
| 1     | 10.521    | 7222507  | 332029 | 51.811  | 58.578   |
| 2     | 12.638    | 6717482  | 234784 | 48.189  | 41.422   |
| Total |           | 13939989 | 566814 | 100.000 | 100.000  |

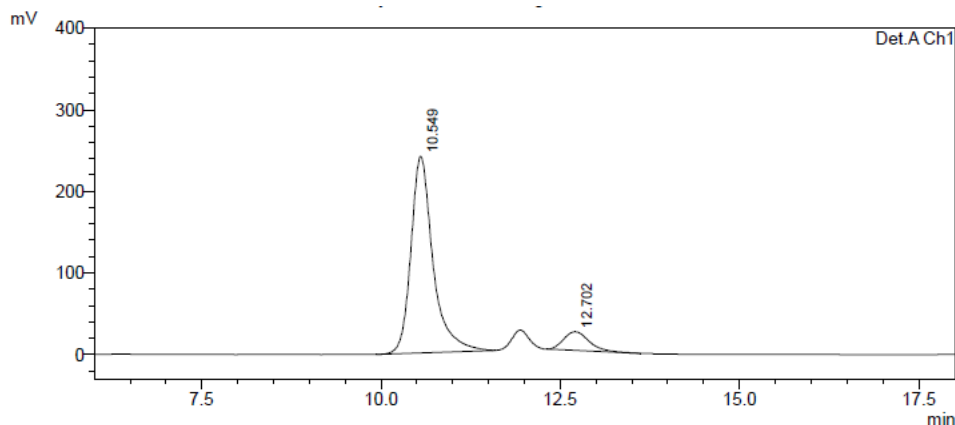

PeakTable

| Peak# | Ret. Time | Area    | Height | Area %  | Height % |
|-------|-----------|---------|--------|---------|----------|
| 1     | 10.549    | 5174053 | 240838 | 90.097  | 91.298   |
| 2     | 12.702    | 568686  | 22956  | 9.903   | 8.702    |
| Total |           | 5742739 | 263794 | 100.000 | 100.000  |

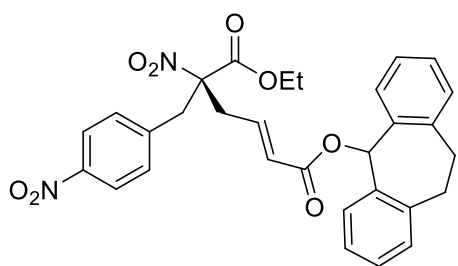

**1-(10,11-Dihydro-5H-dibenzo[*a,d*][7]annulen-5-yl) 6-ethyl (*S,E*)-5-nitro-5-(4-nitrobenzyl)hex-2-enedioate (31)**

Colourless oil;  $[\alpha]_D^{25} = -4.6$  ( $c = 2.0$ ,  $\text{CHCl}_3$ );

$^1\text{H NMR}$  (500 MHz,  $\text{CDCl}_3$ ):  $\delta = 8.15$  (d,  $J = 9.0$  Hz, 2H), 7.43 (d,  $J = 7.5$  Hz, 2H), 7.28–7.24 (m, 4H), 7.20–7.17 (m, 4H), 6.94 (s, 1H), 6.78 (dt,  $J = 15.0, 7.5$  Hz, 1H), 5.99 (d,  $J = 15.5$  Hz, 1H), 4.27–4.20 (m, 2H), 3.67 (d,  $J = 14.5$  Hz, 1H), 3.60–3.55 (m, 2H), 3.54 (d,  $J = 14.5$  Hz, 1H), 3.06–3.01 (m, 2H), 2.99–2.88 (m, 2H), 1.19 (t,  $J = 7.0$  Hz, 3H) ppm.  $^{13}\text{C NMR}$  (125 MHz,  $\text{CDCl}_3$ ):  $\delta = 165.25, 164.15, 147.96, 140.35, 140.12, 138.78, 136.31, 131.10, 130.53, 130.16, 129.11, 127.56, 126.35, 124.08, 94.75, 80.07, 63.76, 39.79, 36.40, 32.54, 13.86$  ppm. HRMS (ESI)  $m/z$  calcd for  $\text{C}_{30}\text{H}_{28}\text{N}_2\text{NaO}_8$   $[\text{M}+\text{Na}]^+$  567.1738, found 567.1731. The *ee* value was 75%,  $t_R$  (minor) = 25.480 min,  $t_R$  (major) = 29.696 min (Chiralpak IC,  $\lambda = 220$  nm, 20.0% *i*PrOH/hexane, flow rate = 1.0 mL/min).

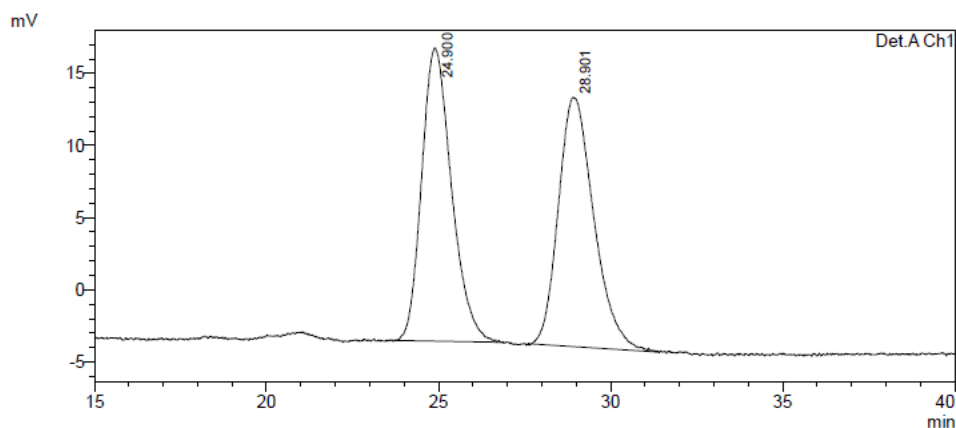

PeakTable

| Peak# | Ret. Time | Area    | Height | Area %  | Height % |
|-------|-----------|---------|--------|---------|----------|
| 1     | 24.900    | 1230213 | 20321  | 49.826  | 54.049   |
| 2     | 28.901    | 1238784 | 17277  | 50.174  | 45.951   |
| Total |           | 2468997 | 37598  | 100.000 | 100.000  |

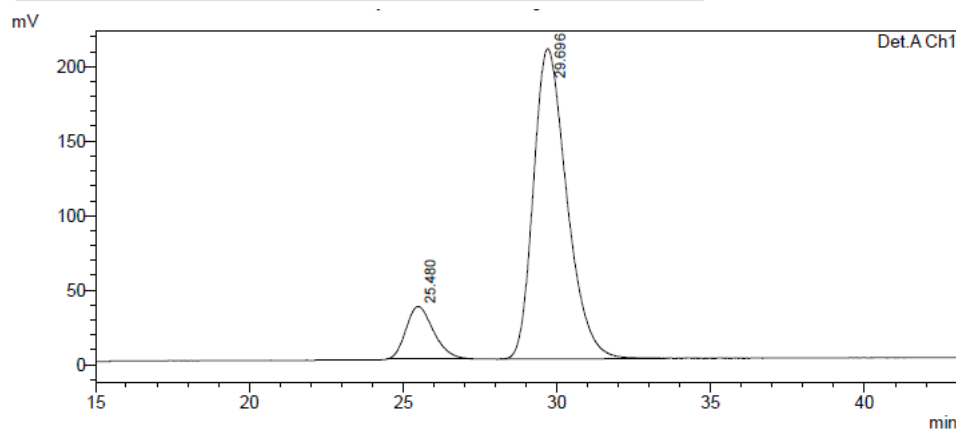

PeakTable

| Peak# | Ret. Time | Area     | Height | Area %  | Height % |
|-------|-----------|----------|--------|---------|----------|
| 1     | 25.480    | 2206737  | 35262  | 12.297  | 14.484   |
| 2     | 29.696    | 15738738 | 208197 | 87.703  | 85.516   |
| Total |           | 17945475 | 243459 | 100.000 | 100.000  |

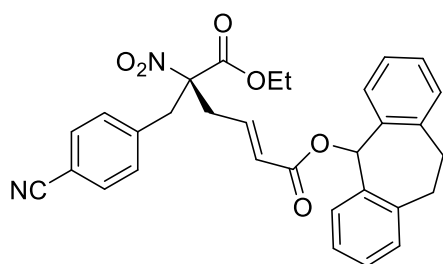

**1-(10,11-Dihydro-5H-dibenzo[*a,d*][7]annulen-5-yl) 6-ethyl (*S,E*)-5-(4-cyanobenzyl)-5-nitrohex-2-enedioate (3m)**

Colourless oil;  $[\alpha]_D^{25} = -4.7$  ( $c = 2.0$ ,  $\text{CHCl}_3$ );  $^1\text{H}$  NMR (500 MHz,  $\text{CDCl}_3$ ):  $\delta = 7.58$  (d,  $J = 8.5$  Hz,

2H), 7.43 (d,  $J = 7.5$  Hz, 2H), 7.28–7.24 (m, 2H), 7.21–7.17 (m, 6H), 6.94 (s, 1H), 6.77 (dt,  $J = 15.5, 7.5$  Hz, 1H), 5.98 (dt,  $J = 15.5, 1.0$  Hz, 1H), 4.27–4.18 (m, 2H), 3.63 (d,  $J = 14.5$  Hz, 1H), 3.60–3.55 (m, 2H), 3.50 (d,  $J = 14.5$  Hz, 1H), 3.07–3.01 (m, 2H), 2.97–2.86 (m, 2H), 1.18 (t,  $J = 7.0$  Hz, 3H) ppm.  $^{13}\text{C}$  NMR (125 MHz,  $\text{CDCl}_3$ ):  $\delta = 165.29, 164.15, 140.34, 138.87, 138.13, 136.32, 132.67, 130.90, 130.52, 130.15,$

129.10, 127.47, 126.33, 118.31, 112.48, 94.77, 80.03, 63.69, 40.06, 36.34, 32.53, 13.84 ppm. HRMS (ESI)  $m/z$  calcd for  $C_{31}H_{28}N_2NaO_6$   $[M+Na]^+$  547.1840, found 547.1843. The *ee* value was 76%,  $t_R$  (major) = 33.533 min,  $t_R$  (minor) = 36.555 min (Chiralpak IC,  $\lambda$  = 220 nm, 20.0% *i*PrOH/hexane, flow rate = 1.0 mL/min).

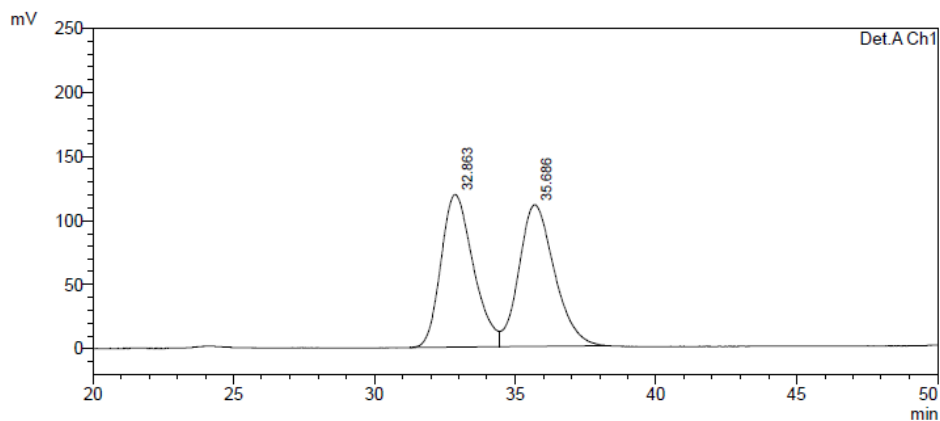

PeakTable

| Peak# | Ret. Time | Area     | Height | Area %  | Height % |
|-------|-----------|----------|--------|---------|----------|
| 1     | 32.863    | 9533020  | 119244 | 49.523  | 51.847   |
| 2     | 35.686    | 9716627  | 110748 | 50.477  | 48.153   |
| Total |           | 19249647 | 229992 | 100.000 | 100.000  |

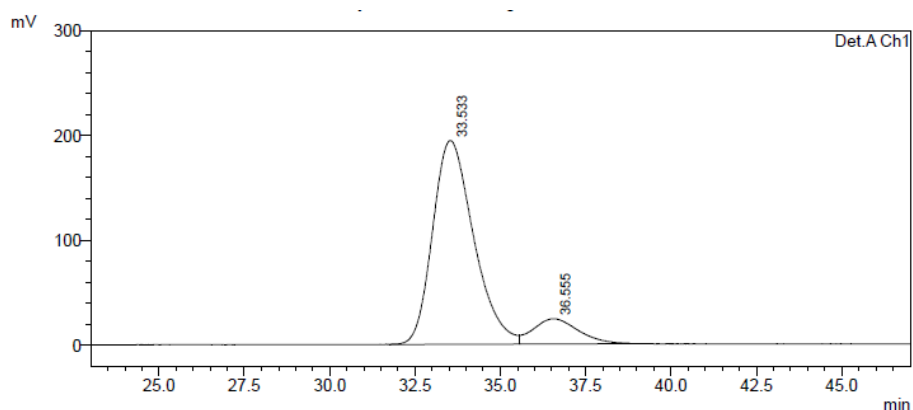

PeakTable

| Peak# | Ret. Time | Area     | Height | Area %  | Height % |
|-------|-----------|----------|--------|---------|----------|
| 1     | 33.533    | 16257290 | 194473 | 88.072  | 88.994   |
| 2     | 36.555    | 2201827  | 24051  | 11.928  | 11.006   |
| Total |           | 18459117 | 218524 | 100.000 | 100.000  |

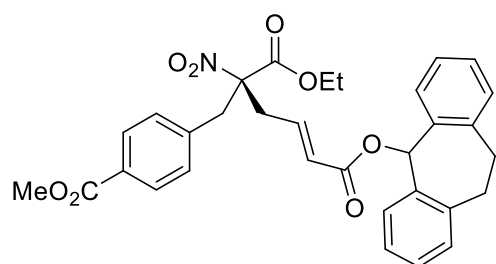

**1-(10,11-Dihydro-5*H*-dibenzo[*a,d*][7]annulen-5-yl) 6-ethyl (S,E)-5-(4-(methoxycarbonyl)benzyl)-5-nitrohex-2-enedioate (3n)**

Colourless oil;  $[\alpha]_D^{25} = -3.4$  ( $c = 2.0$ ,  $CHCl_3$ );

$^1H$  NMR (500 MHz,  $CDCl_3$ ):  $\delta = 7.97$  (d,  $J = 8.0$  Hz, 2H), 7.44–7.42 (m, 2H), 7.27–

7.24 (m, 2H), 7.20–7.14 (m, 6H), 6.94 (s, 1H), 6.81 (dt,  $J = 15.0, 7.5$  Hz, 1H), 5.98 (d,  $J = 15.5$  Hz, 1H), 4.26–4.19 (m, 2H), 3.91 (s, 3H), 3.63 (d,  $J = 14.0$  Hz, 1H), 3.60–3.55 (m, 2H), 3.51 (d,  $J = 14.5$  Hz, 1H), 3.06–3.01 (m, 2H), 2.95–2.86 (m, 2H), 1.19 (t,  $J = 7.0$  Hz, 3H) ppm.  $^{13}\text{C}$  NMR (125 MHz,  $\text{CDCl}_3$ ):  $\delta = 166.63, 165.50, 164.23, 140.28, 139.31, 137.77, 136.41, 130.50, 130.19, 130.11, 130.03, 129.03, 127.28, 126.32, 95.02, 79.84, 63.52, 52.34, 39.97, 36.16, 32.52, 13.85$  ppm. HRMS (ESI)  $m/z$  calcd for  $\text{C}_{32}\text{H}_{31}\text{NNaO}_8$   $[\text{M}+\text{Na}]^+$  580.1942, found 580.1936. The  $ee$  value was 87%,  $t_R$  (minor) = 21.168 min,  $t_R$  (major) = 28.264 min (Chiralpak IC,  $\lambda = 220$  nm, 20.0%  $i\text{PrOH}$ /hexane, flow rate = 1.0 mL/min).

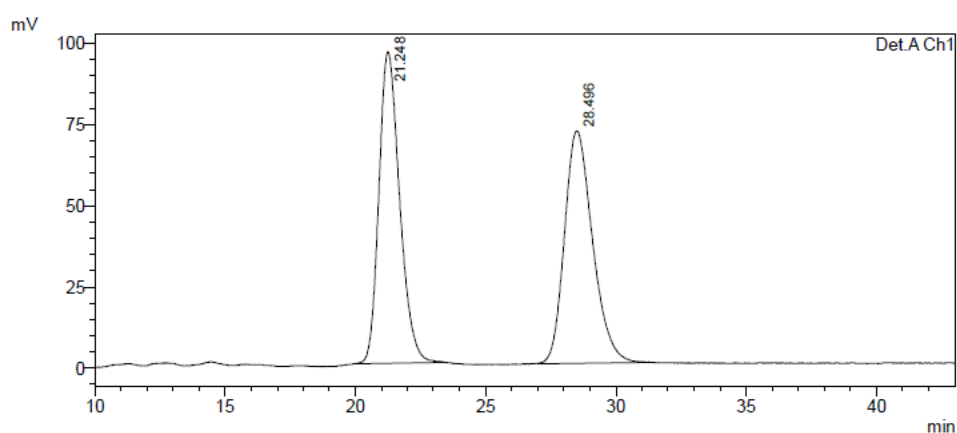

1 Det.A Ch1/220nm

PeakTable

Detector A Ch1 220nm

| Peak# | Ret. Time | Area     | Height | Area %  | Height % |
|-------|-----------|----------|--------|---------|----------|
| 1     | 21.248    | 5324056  | 95889  | 49.747  | 57.268   |
| 2     | 28.496    | 5378272  | 71550  | 50.253  | 42.732   |
| Total |           | 10702328 | 167438 | 100.000 | 100.000  |

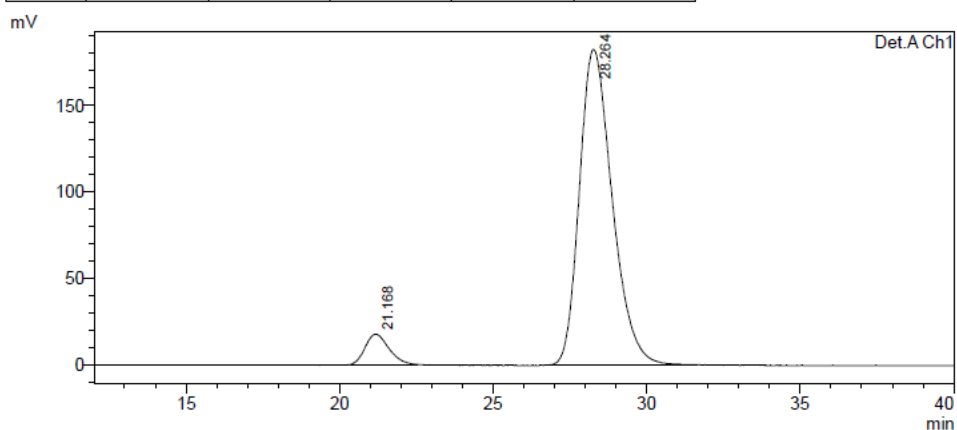

1 Det.A Ch1/220nm

PeakTable

Detector A Ch1 220nm

| Peak# | Ret. Time | Area     | Height | Area %  | Height % |
|-------|-----------|----------|--------|---------|----------|
| 1     | 21.168    | 919434   | 17404  | 6.355   | 8.718    |
| 2     | 28.264    | 13548785 | 182230 | 93.645  | 91.282   |
| Total |           | 14468219 | 199634 | 100.000 | 100.000  |

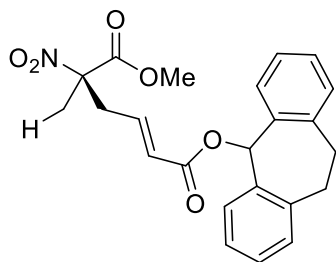

**1-(10,11-Dihydro-5H-dibenzo[*a,d*][7]annulen-5-yl)**

**6-methyl (*R,E*)-5-methyl-5-nitrohex-2-enedioate (4a)**

Colourless oil;  $[\alpha]_D^{25} = 5.6$  ( $c = 2.0$ ,  $\text{CHCl}_3$ );  $^1\text{H NMR}$  (500 MHz,  $\text{CDCl}_3$ ):  $\delta = 7.42$  (d,  $J = 7.5$  Hz, 2H), 7.27–7.23 (m, 2H), 7.19–7.16 (m, 4H), 6.93 (s, 1H), 6.76 (dt,  $J = 15.5, 7.5$  Hz, 1H), 5.99 (dt,  $J = 15.5, 1.0$  Hz, 1H), 3.80 (s, 3H), 3.60–3.53 (m, 2H), 3.12–2.98 (m, 4H), 1.77 (s, 3H) ppm.  $^{13}\text{C NMR}$  (125 MHz,  $\text{CDCl}_3$ ):  $\delta = 167.13, 164.30, 140.30, 139.40, 136.45, 130.50, 130.03, 129.02, 127.37, 126.32, 91.43, 79.73, 53.89, 39.18, 32.53, 21.50$  ppm. HRMS (ESI)  $m/z$  calcd for  $\text{C}_{23}\text{H}_{23}\text{NNaO}_6$   $[\text{M}+\text{Na}]^+$  432.1418, found 432.1421. The *ee* value was 91%,  $t_R$  (major) = 18.466 min,  $t_R$  (minor) = 23.410 min (Chiralpak IC,  $\lambda = 220$  nm, 5.0% *i*PrOH/hexane, flow rate = 1.0 mL/min).

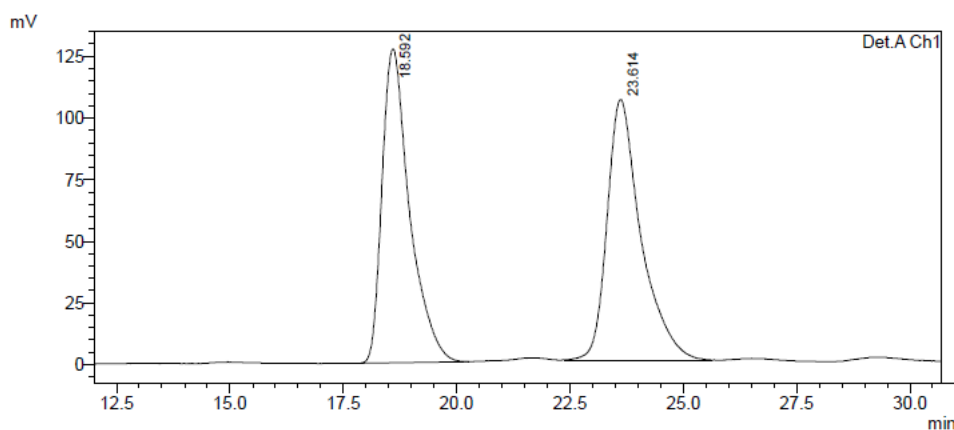

1 Det.A Ch1/220nm

PeakTable

| Detector A Ch1 220nm |           |          |        |         |          |  |
|----------------------|-----------|----------|--------|---------|----------|--|
| Peak#                | Ret. Time | Area     | Height | Area %  | Height % |  |
| 1                    | 18.592    | 5381460  | 127254 | 49.515  | 54.632   |  |
| 2                    | 23.614    | 5486857  | 105673 | 50.485  | 45.368   |  |
| Total                |           | 10868317 | 232927 | 100.000 | 100.000  |  |



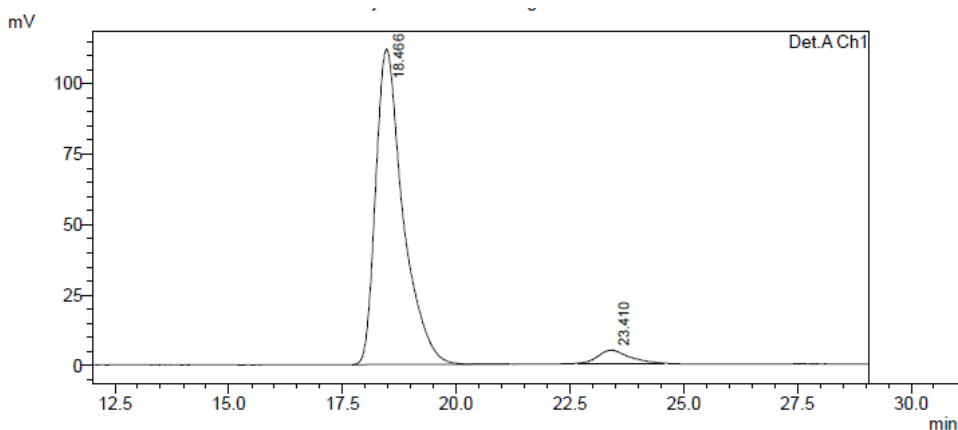

1 Det.A Ch1/220nm

PeakTable

| Peak# | Ret. Time | Area    | Height | Area %  | Height % |
|-------|-----------|---------|--------|---------|----------|
| 1     | 18.466    | 4666507 | 111866 | 95.674  | 96.041   |
| 2     | 23.410    | 211010  | 4611   | 4.326   | 3.959    |
| Total |           | 4877516 | 116477 | 100.000 | 100.000  |

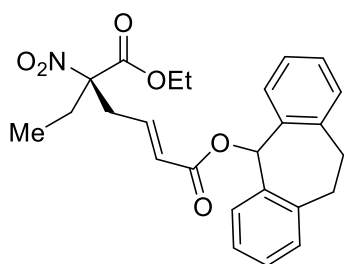

**1-(10,11-Dihydro-5H-dibenzo[*a,d*][7]annulen-5-yl)**

**6-ethyl (*R,E*)-5-ethyl-5-nitrohex-2-enedioate (4b)**

Colourless oil;  $[\alpha]_D^{25} = 3.8$  ( $c = 2.0$ ,  $\text{CHCl}_3$ );  $^1\text{H NMR}$  (500 MHz,  $\text{CDCl}_3$ ):  $\delta = 7.42$  (d,  $J = 7.0$  Hz, 2H), 7.26–7.23 (m, 2H), 7.19–7.16 (m, 4H), 6.93 (s, 1H), 6.73 (dt,  $J = 15.5, 7.5$  Hz, 1H), 5.97 (d,  $J = 15.5$  Hz, 1H), 4.24 (q,  $J = 7.0$  Hz, 2H), 3.59–3.53 (m, 2H), 3.06–3.01 (m, 4H), 2.30–2.14 (m, 2H), 1.23 (t,  $J = 7.0$  Hz, 3H), 0.91 (t,  $J = 7.0$  Hz, 3H) ppm.  $^{13}\text{C NMR}$  (125 MHz,  $\text{CDCl}_3$ ):  $\delta = 166.06, 164.31, 140.27, 139.62, 136.47, 130.48, 130.00, 128.99, 126.89, 126.30, 95.38, 79.65, 63.13, 36.13, 32.51, 27.44, 13.93, 8.04$  ppm. HRMS (ESI)  $m/z$  calcd for  $\text{C}_{25}\text{H}_{27}\text{NNaO}_6$   $[\text{M}+\text{Na}]^+$  460.1731, found 460.1737. The *ee* value was 91%,  $t_R$  (minor) = 9.903 min,  $t_R$  (major) = 12.173 min (Chiralpak IF,  $\lambda = 220$  nm, 10.0% *i*PrOH/hexane, flow rate = 1.0 mL/min).

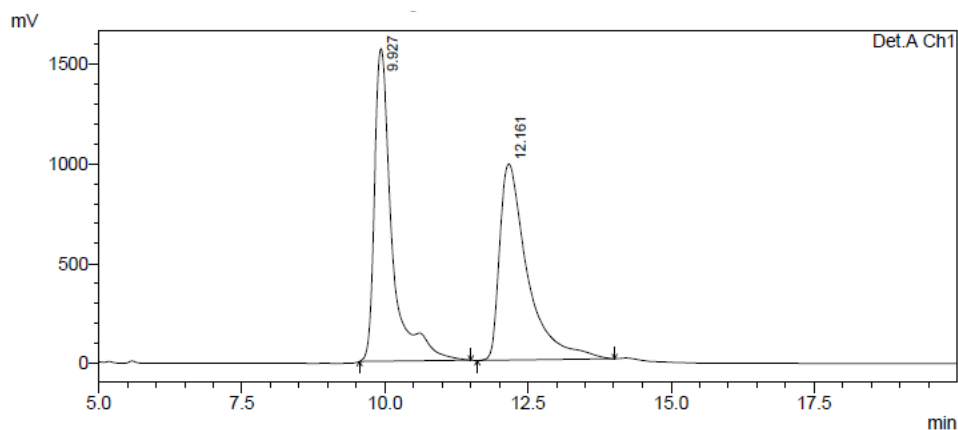

| Peak# | Ret. Time | Area     | Height  | Area %  | Height % |
|-------|-----------|----------|---------|---------|----------|
| 1     | 9.927     | 33619401 | 1565760 | 50.222  | 61.443   |
| 2     | 12.161    | 33322261 | 982553  | 49.778  | 38.557   |
| Total |           | 66941661 | 2548314 | 100.000 | 100.000  |

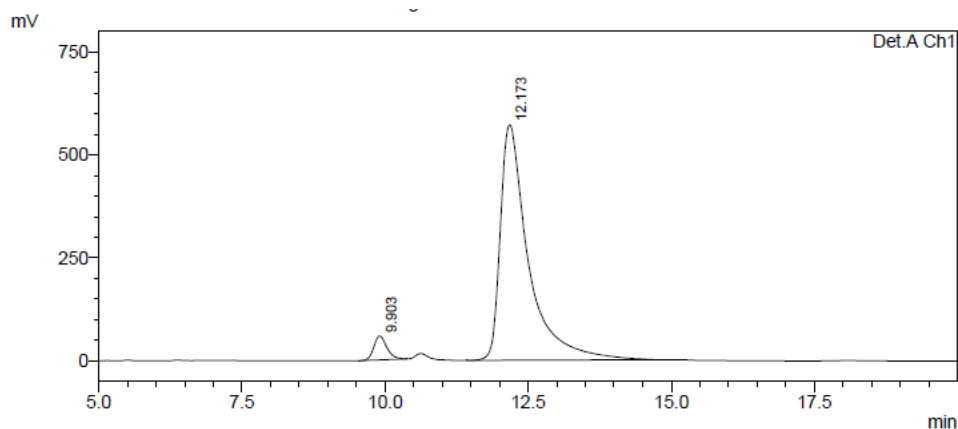

| Peak# | Ret. Time | Area     | Height | Area %  | Height % |
|-------|-----------|----------|--------|---------|----------|
| 1     | 9.903     | 924042   | 58053  | 4.511   | 9.221    |
| 2     | 12.173    | 19561535 | 571553 | 95.489  | 90.779   |
| Total |           | 20485578 | 629606 | 100.000 | 100.000  |

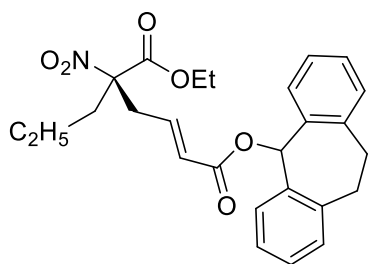

**1-(10,11-Dihydro-5H-dibenzo[*a,d*][7]annulen-5-yl)**

**6-ethyl (*R,E*)-5-nitro-5-propylhex-2-enedioate (4c)**

Colourless oil;  $[\alpha]_D^{25} = 0.8$  ( $c = 2.0$ , CHCl<sub>3</sub>); <sup>1</sup>H NMR (500 MHz, CDCl<sub>3</sub>):  $\delta = 7.42$  (d,  $J = 7.5$  Hz, 2H), 7.26–7.23 (m, 2H), 7.19–7.16 (m, 4H), 6.93 (s, 1H), 6.74 (dt,  $J = 15.5, 7.5$  Hz, 1H), 5.96 (dt,  $J = 15.5, 1.0$  Hz, 1H), 4.24 (q,  $J = 7.0$  Hz, 2H), 3.59–3.53 (m, 2H), 3.06–3.00 (m, 4H), 2.21–2.07 (m, 2H), 1.33–1.19 (m, 2H), 1.22 (t,  $J = 7.0$  Hz, 3H), 0.95 (t,  $J = 7.0$  Hz, 3H) ppm. <sup>13</sup>C NMR (125 MHz, CDCl<sub>3</sub>):  $\delta = 166.16, 164.34, 140.26, 139.74, 136.51, 136.48, 130.49, 129.98, 128.99, 126.83, 126.31, 94.96, 79.65, 63.14, 36.70, 36.12, 32.52, 17.09, 14.00, 13.92$  ppm. HRMS (ESI)  $m/z$  calcd for C<sub>26</sub>H<sub>29</sub>NNaO<sub>6</sub> [M+Na]<sup>+</sup> 474.1887, found 474.1881. The *ee* value was 90%,  $t_R$  (minor) = 13.693 min,  $t_R$  (major) = 16.276 min (Chiralpak IC,  $\lambda = 220$  nm, 5.0% *i*PrOH/hexane, flow rate = 1.0 mL/min).

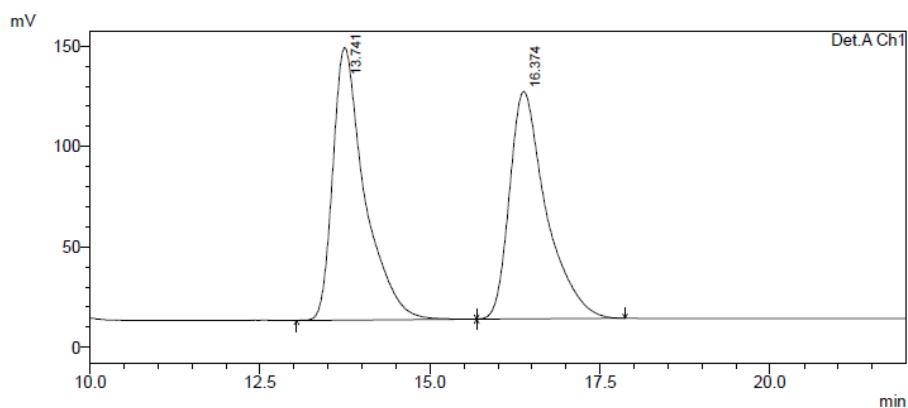

PeakTable

| Peak# | Ret. Time | Area    | Height | Area %  | Height % |
|-------|-----------|---------|--------|---------|----------|
| 1     | 13.741    | 4424091 | 135824 | 50.997  | 54.501   |
| 2     | 16.374    | 4251192 | 113392 | 49.003  | 45.499   |
| Total |           | 8675283 | 249216 | 100.000 | 100.000  |

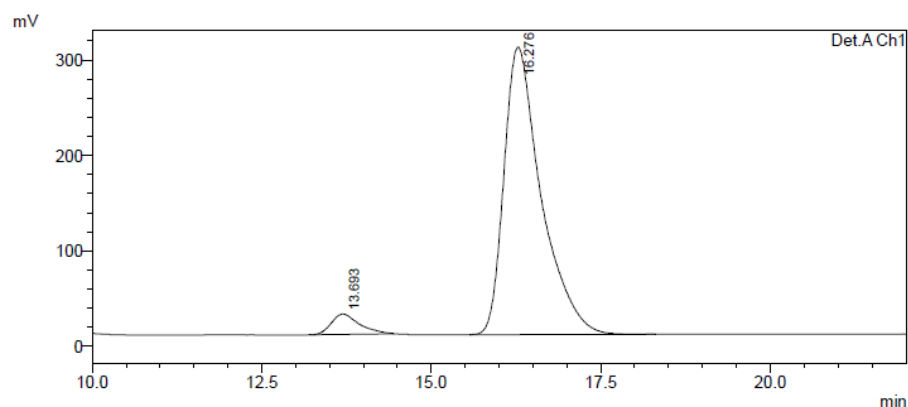

PeakTable

| Peak# | Ret. Time | Area     | Height | Area %  | Height % |
|-------|-----------|----------|--------|---------|----------|
| 1     | 13.693    | 611812   | 21304  | 5.055   | 6.606    |
| 2     | 16.276    | 11491217 | 301201 | 94.945  | 93.394   |
| Total |           | 12103029 | 322505 | 100.000 | 100.000  |

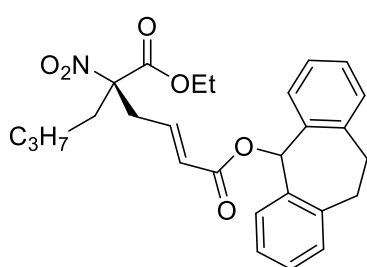

**1-(10,11-Dihydro-5H-dibenzo[*a,d*][7]annulen-5-yl)**

**6-ethyl (*R,E*)-5-butyl-5-nitrohex-2-enedioate (4d)**

Colourless oil;  $[\alpha]_D^{25} = 3.3$  ( $c = 2.0$ ,  $\text{CHCl}_3$ );  $^1\text{H NMR}$  (500 MHz,  $\text{CDCl}_3$ ):  $\delta = 7.42$  (d,  $J = 7.5$  Hz, 2H), 7.26–7.23 (m, 2H), 7.19–7.16 (m, 4H), 6.94 (s, 1H), 6.74 (dt,  $J = 15.5, 7.5$  Hz, 1H), 5.96 (dt,  $J = 15.5, 1.0$  Hz, 1H), 4.24 (q,  $J = 7.0$  Hz, 2H), 3.58–3.52 (m, 2H), 3.07–3.00 (m, 4H), 2.23–2.10 (m, 2H), 1.38–1.31 (m, 2H), 1.27–1.13 (m, 2H), 1.22 (t,  $J = 7.0$  Hz, 3H), 0.89 (t,  $J = 7.0$  Hz, 3H) ppm.  $^{13}\text{C NMR}$  (125 MHz,  $\text{CDCl}_3$ ):  $\delta = 166.16, 164.32, 140.24, 139.72, 136.49, 130.48, 129.94, 128.98, 126.83, 126.30, 95.01, 79.62, 63.13, 36.61, 33.77, 32.51, 25.61, 22.55, 13.92, 13.79$  ppm.

HRMS (ESI)  $m/z$  calcd for  $C_{27}H_{31}NNaO_6$   $[M+Na]^+$  488.2044, found 488.2044. The *ee* value was 90%,  $t_R$  (minor) = 13.198 min,  $t_R$  (major) = 15.314 min (Chiralpak IC,  $\lambda = 220$  nm, 5.0% *i*PrOH/hexane, flow rate = 1.0 mL/min).

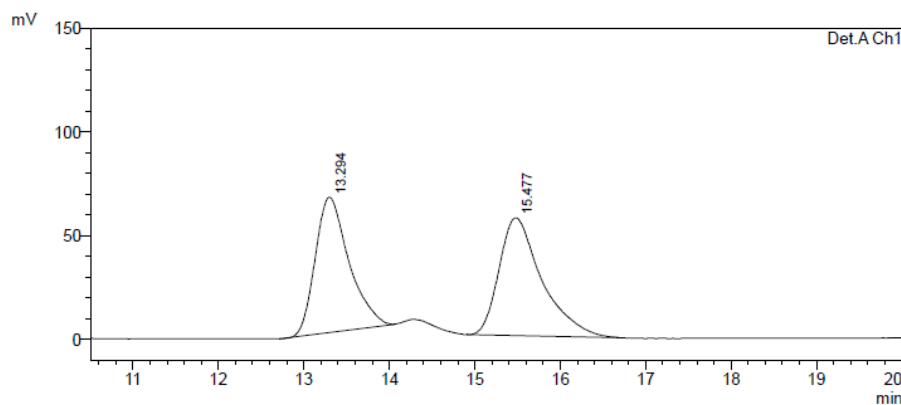

PeakTable

| Peak# | Ret. Time | Area    | Height | Area %  | Height % |
|-------|-----------|---------|--------|---------|----------|
| 1     | 13.294    | 1789723 | 65251  | 47.430  | 53.430   |
| 2     | 15.477    | 1983657 | 56873  | 52.570  | 46.570   |
| Total |           | 3773380 | 122124 | 100.000 | 100.000  |

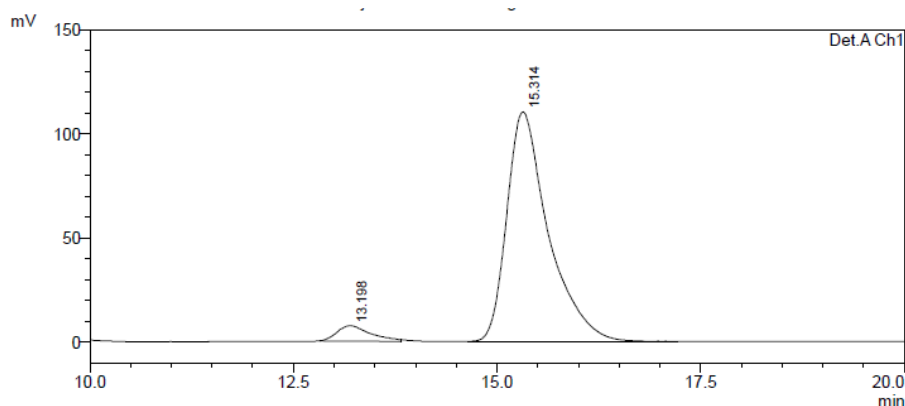

PeakTable

| Peak# | Ret. Time | Area    | Height | Area %  | Height % |
|-------|-----------|---------|--------|---------|----------|
| 1     | 13.198    | 208241  | 7313   | 5.045   | 6.214    |
| 2     | 15.314    | 3919325 | 110371 | 94.955  | 93.786   |
| Total |           | 4127566 | 117684 | 100.000 | 100.000  |

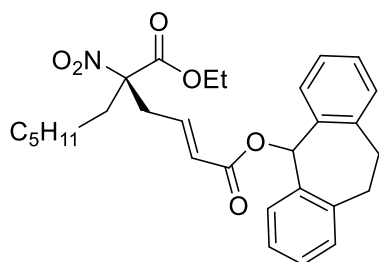

**1-(10,11-Dihydro-5H-dibenzo[*a,d*][7]annulen-5-yl)**

**6-ethyl (*R,E*)-5-hexyl-5-nitrohex-2-enedioate (4e)**

Colourless oil;  $[\alpha]_D^{25} = 1.8$  ( $c = 2.0$ ,  $CHCl_3$ );  $^1H$  NMR (500 MHz,  $CDCl_3$ ):  $\delta = 7.42$  (d,  $J = 7.0$  Hz, 2H), 7.26–7.23 (m, 2H), 7.19–7.16 (m, 4H), 6.93 (s, 1H), 6.74 (dt,  $J = 15.5, 7.5$  Hz, 1H), 5.96 (dt,  $J = 15.5, 1.0$  Hz, 1H), 4.23 (q,  $J = 7.0$  Hz, 2H), 3.58–3.52 (m, 2H), 3.09–3.99 (m, 4H), 2.22–2.09 (m, 2H), 1.34–1.15 (m, 8H),

1.22 (t,  $J = 7.0$  Hz, 3H), 0.86 (t,  $J = 7.0$  Hz, 3H) ppm.  $^{13}\text{C}$  NMR (125 MHz,  $\text{CDCl}_3$ ):  $\delta = 166.17, 164.33, 140.25, 139.75, 136.50, 130.48, 129.96, 128.99, 126.83, 126.31, 95.03, 79.63, 63.13, 36.64, 34.05, 32.52, 31.40, 29.04, 23.47, 22.54, 14.07, 13.93$  ppm. HRMS (ESI)  $m/z$  calcd for  $\text{C}_{29}\text{H}_{35}\text{NNaO}_6$   $[\text{M}+\text{Na}]^+$  516.2357, found 516.2349. The *ee* value was 90%,  $t_{\text{R}}$  (minor) = 11.318 min,  $t_{\text{R}}$  (major) = 12.933 min (Chiralpak IC,  $\lambda = 220$  nm, 5.0% *i*PrOH/hexane, flow rate = 1.0 mL/min).

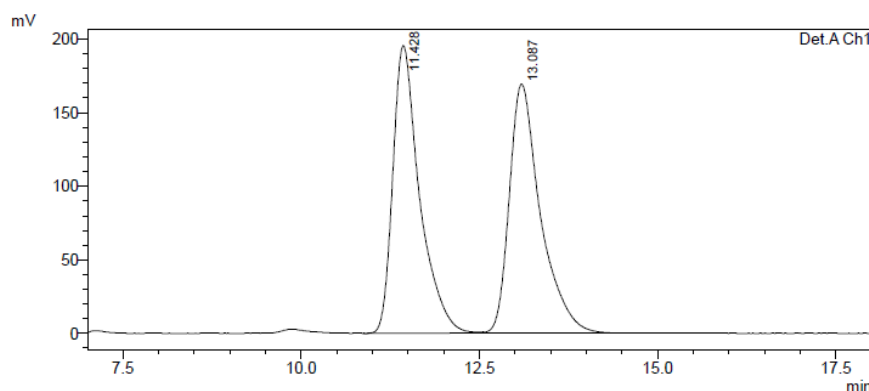

PeakTable

| Peak# | Ret. Time | Area     | Height | Area %  | Height % |
|-------|-----------|----------|--------|---------|----------|
| 1     | 11.428    | 5100203  | 195205 | 49.919  | 53.601   |
| 2     | 13.087    | 5116696  | 168973 | 50.081  | 46.399   |
| Total |           | 10216898 | 364178 | 100.000 | 100.000  |

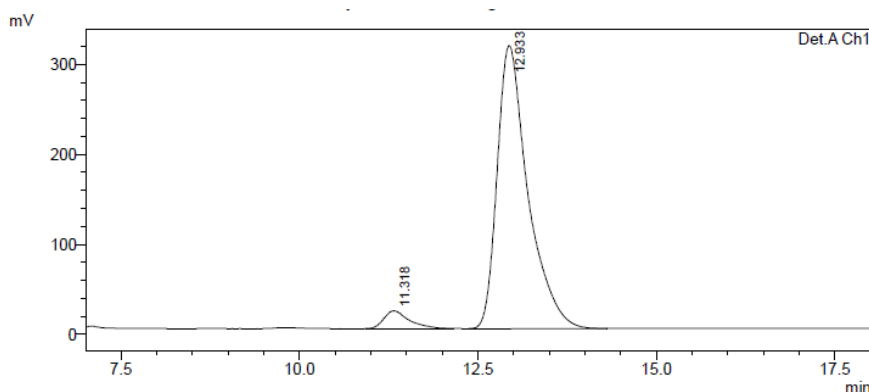

PeakTable

| Peak# | Ret. Time | Area    | Height | Area %  | Height % |
|-------|-----------|---------|--------|---------|----------|
| 1     | 11.318    | 491501  | 19821  | 4.944   | 5.930    |
| 2     | 12.933    | 9448967 | 314416 | 95.056  | 94.070   |
| Total |           | 9940468 | 334237 | 100.000 | 100.000  |

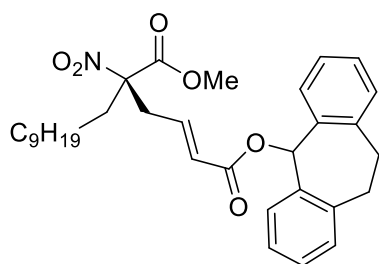

**1-(10,11-Dihydro-5H-dibenzo[*a,d*][7]annulen-5-yl)**

**6-methyl (*R,E*)-5-decyl-5-nitrohex-2-enedioate (4f)**

Colourless oil;  $[\alpha]_{\text{D}}^{25} = 1.8$  ( $c = 2.0$ ,  $\text{CHCl}_3$ );  $^1\text{H}$  NMR (500 MHz,  $\text{CDCl}_3$ ):  $\delta = 7.42$  (d,  $J = 7.5$  Hz, 2H), 7.26–7.23 (m, 2H), 7.19–7.16 (m, 4H), 6.93 (s, 1H),

6.72 (dt,  $J = 15.5, 7.5$  Hz, 1H), 5.96 (dt,  $J = 15.5, 1.0$  Hz, 1H), 3.77 (s, 3H), 3.59–3.52 (m, 2H), 3.10–3.00 (m, 4H), 2.22–2.09 (m, 2H), 1.31–1.13 (m, 16H), 0.88 (t,  $J = 7.0$  Hz, 3H) ppm.  $^{13}\text{C}$  NMR (125 MHz,  $\text{CDCl}_3$ ):  $\delta = 166.73, 164.34, 140.24, 139.59, 136.52, 136.49, 130.50, 129.95, 129.00, 126.90, 126.32, 95.06, 79.66, 53.66, 36.66, 34.06, 32.52, 32.00, 29.61, 29.54, 29.40, 29.28, 23.60, 22.80, 14.25$  ppm. HRMS (ESI)  $m/z$  calcd for  $\text{C}_{32}\text{H}_{41}\text{NNaO}_6$   $[\text{M}+\text{Na}]^+$  558.2826, found 558.2827. The  $ee$  value was 90%,  $t_{\text{R}}$  (minor) = 9.299 min,  $t_{\text{R}}$  (major) = 10.036 min (Chiralpak IB,  $\lambda = 220$  nm, 2.0%  $i\text{PrOH}$ /hexane, flow rate = 1.0 mL/min).

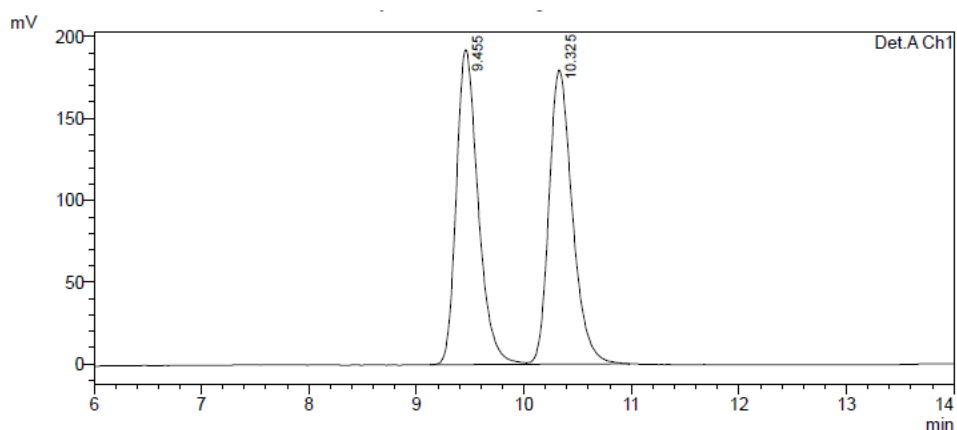

1 Det.A Ch1/220nm

PeakTable

Detector A Ch1 220nm

| Peak# | Ret. Time | Area    | Height | Area %  | Height % |
|-------|-----------|---------|--------|---------|----------|
| 1     | 9.455     | 2715128 | 192165 | 49.998  | 51.702   |
| 2     | 10.325    | 2715377 | 179515 | 50.002  | 48.298   |
| Total |           | 5430505 | 371680 | 100.000 | 100.000  |

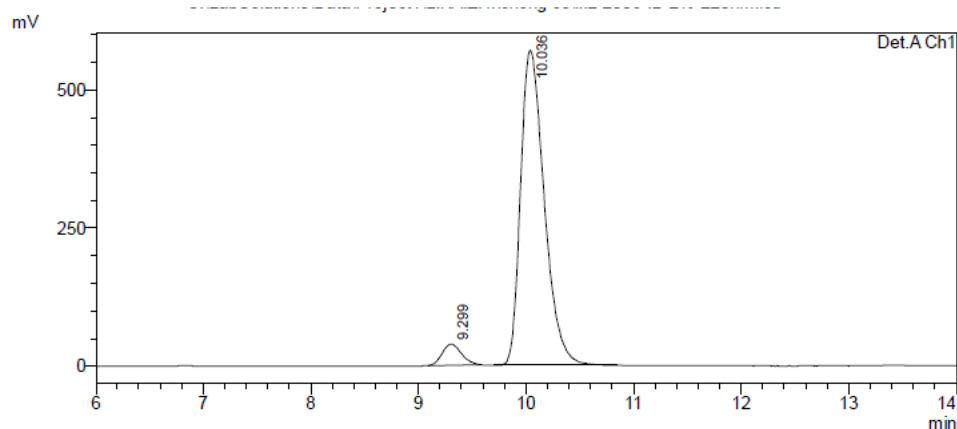

1 Det.A Ch1/220nm

PeakTable

Detector A Ch1 220nm

| Peak# | Ret. Time | Area    | Height | Area %  | Height % |
|-------|-----------|---------|--------|---------|----------|
| 1     | 9.299     | 475292  | 38220  | 5.148   | 6.291    |
| 2     | 10.036    | 8757691 | 569345 | 94.852  | 93.709   |
| Total |           | 9232983 | 607565 | 100.000 | 100.000  |

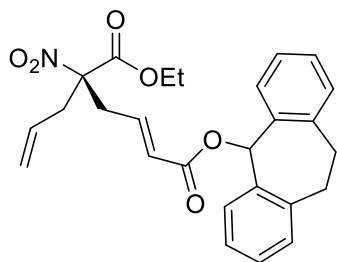

**1-(10,11-Dihydro-5H-dibenzo[*a,d*][7]annulen-5-yl)**

**6-ethyl (*R,E*)-5-allyl-5-nitrohex-2-enedioate (4g)**

Colourless oil;  $[\alpha]_{D}^{25} = -4.1$  ( $c = 2.0$ ,  $\text{CHCl}_3$ );  $^1\text{H}$  NMR (500 MHz,  $\text{CDCl}_3$ ):  $\delta = 7.42$  (d,  $J = 7.0$  Hz, 2H), 7.26–7.23 (m, 2H), 7.19–7.16 (m, 4H), 6.93 (s, 1H), 6.75 (dt,  $J = 15.5, 7.5$  Hz, 1H), 5.97 (dt,  $J = 15.5, 1.0$  Hz, 1H), 5.63–5.55 (m, 1H), 5.24–5.19 (m, 2H), 4.24 (q,  $J = 7.0$  Hz, 2H), 3.59–3.54 (m, 2H), 3.06–3.01 (m, 4H), 2.97 (dd,  $J = 14.5, 7.5$  Hz, 1H), 2.88 (dd,  $J = 14.5, 7.5$  Hz, 1H), 1.22 (t,  $J = 7.0$  Hz, 3H) ppm.  $^{13}\text{C}$  NMR (125 MHz,  $\text{CDCl}_3$ ):  $\delta = 165.62, 164.29, 140.25, 139.44, 136.47, 130.48, 129.97, 129.00, 128.08, 127.11, 126.31, 122.15, 94.23, 79.68, 63.30, 38.64, 36.46, 32.52, 13.94$  ppm. HRMS (ESI)  $m/z$  calcd for  $\text{C}_{26}\text{H}_{27}\text{NNaO}_6$   $[\text{M}+\text{Na}]^+$  472.1731, found 472.1738. The *ee* value was 90%,  $t_{\text{R}}$  (minor) = 34.387 min,  $t_{\text{R}}$  (major) = 40.555 min (Chiralpak IF,  $\lambda = 220$  nm, 1.0% *i*PrOH/hexane, flow rate = 1.0 mL/min).

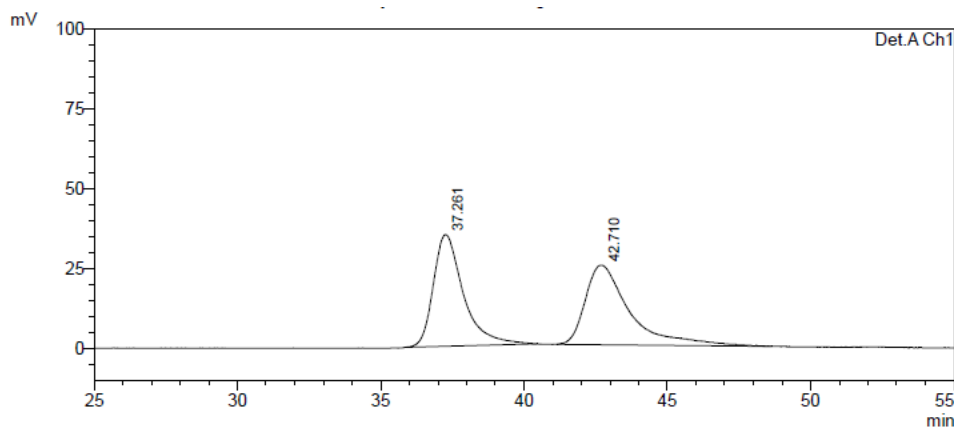

1 Det.A Ch1/220nm

PeakTable

| Peak# | Ret. Time | Area    | Height | Area %  | Height % |
|-------|-----------|---------|--------|---------|----------|
| 1     | 37.261    | 2570624 | 34999  | 49.131  | 58.414   |
| 2     | 42.710    | 2661516 | 24917  | 50.869  | 41.586   |
| Total |           | 5232140 | 59916  | 100.000 | 100.000  |

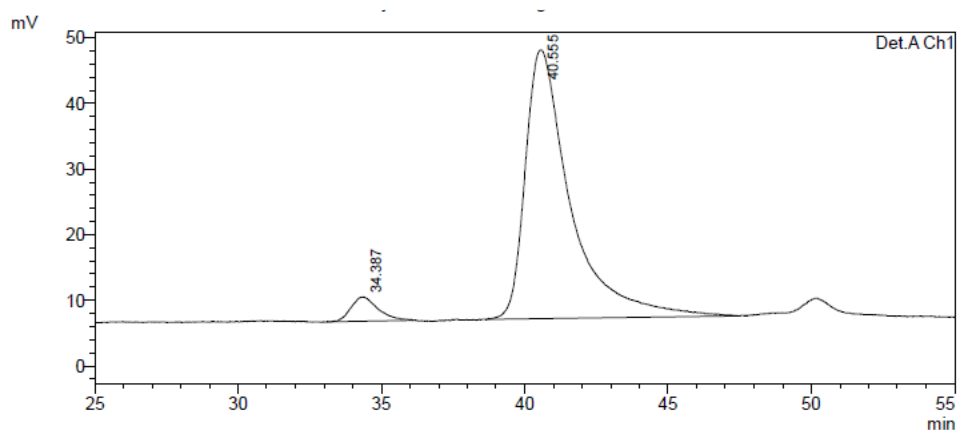

1 Det.A Ch1/220nm

PeakTable

| Peak# | Ret. Time | Area    | Height | Area %  | Height % |
|-------|-----------|---------|--------|---------|----------|
| 1     | 34.387    | 241244  | 3696   | 5.094   | 8.284    |
| 2     | 40.555    | 4494242 | 40918  | 94.906  | 91.716   |
| Total |           | 4735486 | 44614  | 100.000 | 100.000  |

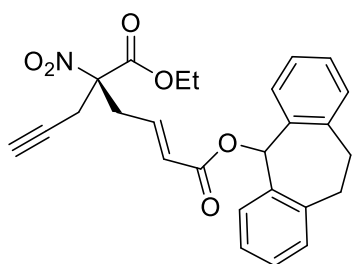

**1-(10,11-Dihydro-5H-dibenzo[*a,d*][7]annulen-5-yl)  
6-ethyl (*S,E*)-5-nitro-5-(prop-2-yn-1-yl)hex-  
2-enedioate (**4h**)**

Colourless oil;  $[\alpha]_D^{25} = -0.8$  ( $c = 2.0$ ,  $\text{CHCl}_3$ );  $^1\text{H NMR}$  (500 MHz,  $\text{CDCl}_3$ ):  $\delta = 7.43$  (d,  $J = 7.5$  Hz, 2H), 7.27–7.24 (m, 2H), 7.19–7.16 (m, 4H), 6.94 (s, 1H), 6.74 (dt,  $J = 15.5, 7.5$  Hz, 1H), 6.04 (d,  $J = 15.5$  Hz, 1H), 4.27 (q,  $J = 7.0$  Hz, 2H), 3.59–3.53 (m, 2H), 3.23–3.18 (m, 3H), 3.08–3.01 (m, 3H), 2.14 (t,  $J = 2.5$  Hz, 1H), 1.24 (t,  $J = 7.0$  Hz, 3H) ppm.  $^{13}\text{C NMR}$  (125 MHz,  $\text{CDCl}_3$ ):  $\delta = 164.64, 164.23, 140.30, 138.80, 136.45, 136.43, 130.49, 130.05, 129.03, 127.63, 126.31, 92.60, 79.78, 75.37, 74.05, 63.75, 36.02, 32.53, 25.10, 13.87$  ppm. HRMS (ESI)  $m/z$  calcd for  $\text{C}_{26}\text{H}_{25}\text{NNaO}_6$   $[\text{M}+\text{Na}]^+$  470.1574, found 470.1577. The *ee* value was 89%,  $t_R$  (major) = 16.977 min,  $t_R$  (minor) = 19.319 min (Chiralpak IC,  $\lambda = 220$  nm, 5.0% *i*PrOH/hexane, flow rate = 1.0 mL/min).



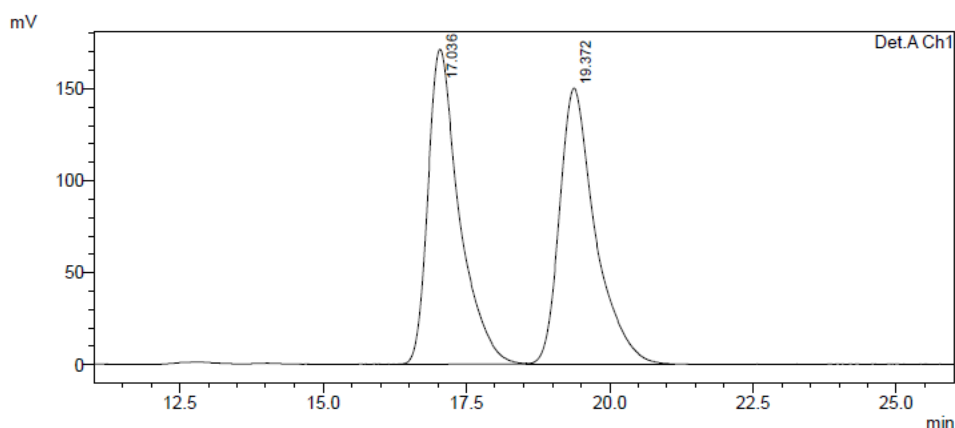

PeakTable

| Peak# | Ret. Time | Area     | Height | Area %  | Height % |
|-------|-----------|----------|--------|---------|----------|
| 1     | 17.036    | 6511787  | 171203 | 50.014  | 53.284   |
| 2     | 19.372    | 6508158  | 150100 | 49.986  | 46.716   |
| Total |           | 13019945 | 321302 | 100.000 | 100.000  |

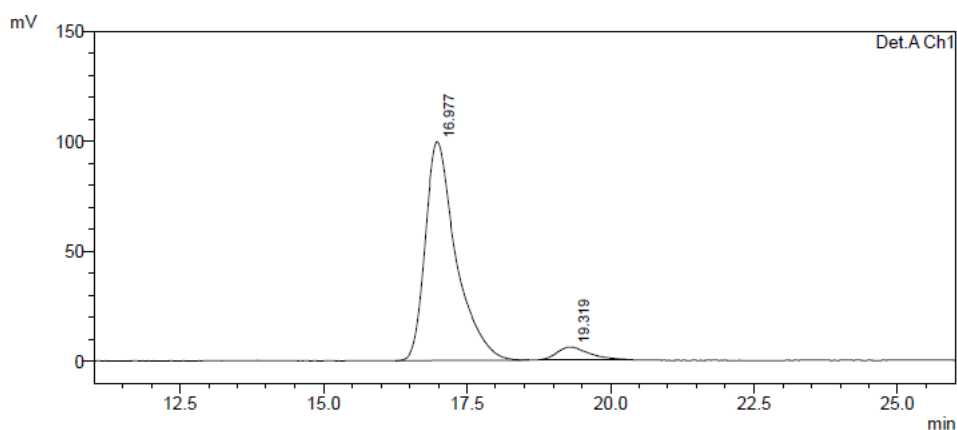

PeakTable

| Peak# | Ret. Time | Area    | Height | Area %  | Height % |
|-------|-----------|---------|--------|---------|----------|
| 1     | 16.977    | 3711443 | 99646  | 94.426  | 94.609   |
| 2     | 19.319    | 219090  | 5678   | 5.574   | 5.391    |
| Total |           | 3930534 | 105323 | 100.000 | 100.000  |

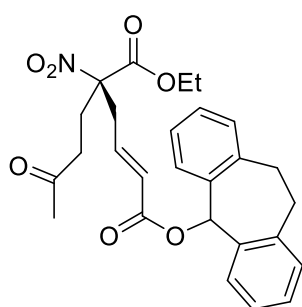

**1-(10,11-Dihydro-5H-dibenzo[*a,d*][7]annulen-5-yl)  
6-ethyl (*R,E*)-5-nitro-5-(3-oxobutyl)hex-2-enedioate (4i)**

Colourless oil;  $[\alpha]_D^{25} = 0.6$  ( $c = 2.0$ ,  $\text{CHCl}_3$ );  $^1\text{H NMR}$  (500 MHz,  $\text{CDCl}_3$ ):  $\delta = 7.43$  (d,  $J = 8.0$  Hz, 2H), 7.26–7.23 (m, 2H), 7.19–7.16 (m, 4H), 6.92 (s, 1H), 6.74 (dt,  $J = 15.5$ , 7.5 Hz, 1H), 5.97 (d,  $J = 15.5$  Hz, 1H), 4.26–4.20 (m, 2H), 3.58–3.52 (m, 2H), 3.06–2.99 (m, 4H), 2.55–2.52 (m, 2H), 2.45–2.41 (m, 2H), 2.13 (s, 3H), 1.23 (t,  $J = 7.0$  Hz, 3H) ppm.  $^{13}\text{C NMR}$  (125 MHz,  $\text{CDCl}_3$ ):  $\delta = 205.40$ , 165.75, 164.18, 140.28, 139.13, 136.44, 130.48, 130.03, 129.00, 127.23, 126.30, 94.09, 79.75,

63.41, 38.01, 37.78, 32.52, 30.00, 28.33, 13.89 ppm. HRMS (ESI)  $m/z$  calcd for  $C_{27}H_{29}NNaO_7$   $[M+Na]^+$  502.1836, found 502.1826. The *ee* value was 86%,  $t_R$  (minor) = 26.166 min,  $t_R$  (major) = 28.500 min (Chiralpak IA,  $\lambda$  = 220 nm, 5.0% *i*PrOH/hexane, flow rate = 1.0 mL/min).

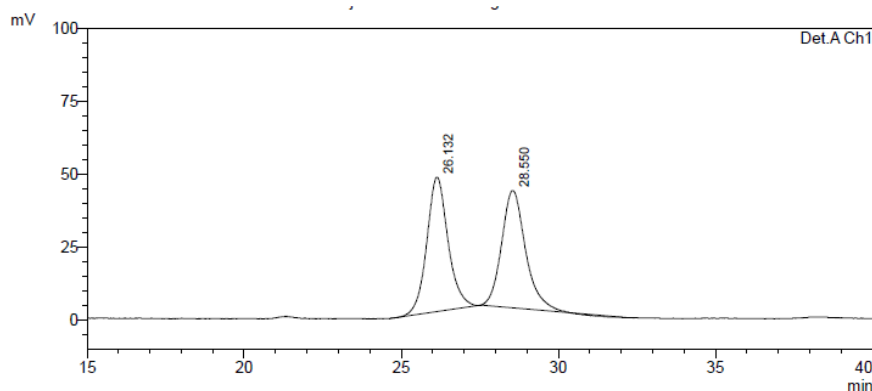

PeakTable

| Peak# | Ret. Time | Area    | Height | Area %  | Height % |
|-------|-----------|---------|--------|---------|----------|
| 1     | 26.132    | 2175670 | 46150  | 50.678  | 53.370   |
| 2     | 28.550    | 2117486 | 40323  | 49.322  | 46.630   |
| Total |           | 4293156 | 86473  | 100.000 | 100.000  |

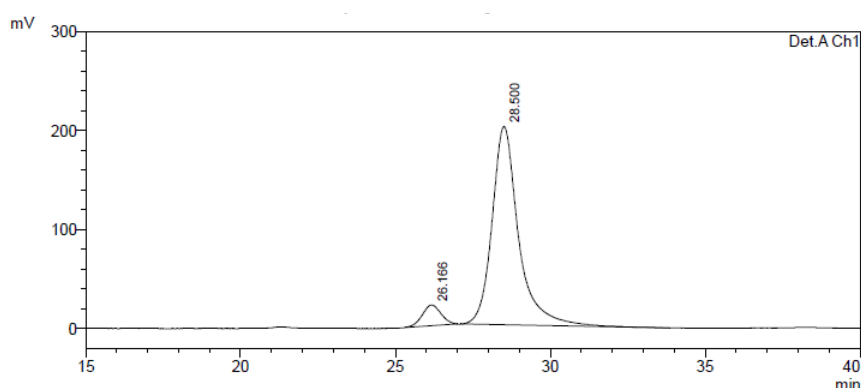

PeakTable

| Peak# | Ret. Time | Area     | Height | Area %  | Height % |
|-------|-----------|----------|--------|---------|----------|
| 1     | 26.166    | 883559   | 20984  | 6.874   | 9.467    |
| 2     | 28.500    | 11969322 | 200667 | 93.126  | 90.533   |
| Total |           | 12852881 | 221652 | 100.000 | 100.000  |

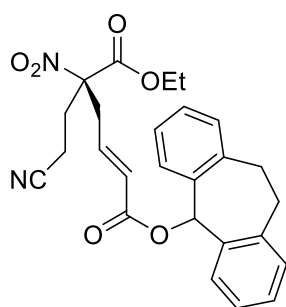

**1-(10,11-Dihydro-5H-dibenzo[*a,d*][7]annulen-5-yl) 6-ethyl  
(*R,E*)-5-(2-cyanoethyl)-5-nitrohex-2-enedioate (4j)**

Colourless oil;  $[\alpha]_D^{25}$  = 3.9 ( $c$  = 2.0,  $CHCl_3$ );  $^1H$  NMR (500 MHz,  $CDCl_3$ ):  $\delta$  = 7.42 (d,  $J$  = 7.5 Hz, 2H), 7.27–7.24 (m, 2H), 7.20–7.17 (m, 4H), 6.93 (s, 1H), 6.69 (dt,  $J$  = 15.5, 7.5 Hz, 1H), 6.02 (d,  $J$  = 15.5 Hz, 1H), 4.32–4.27 (m, 2H), 3.60–3.54 (m, 2H), 3.14–3.00 (m, 4H), 2.55–2.44 (m, 4H), 1.26 (t,  $J$  = 7.0 Hz, 3H) ppm.

$^{13}\text{C}$  NMR (125 MHz,  $\text{CDCl}_3$ ):  $\delta = 164.77, 163.98, 140.35, 137.95, 136.28, 136.25, 130.52, 130.17, 129.09, 128.04, 126.32, 117.62, 92.97, 80.09, 64.04, 37.69, 32.52, 30.33, 13.85, 12.81$  ppm. HRMS (ESI)  $m/z$  calcd for  $\text{C}_{26}\text{H}_{26}\text{N}_2\text{NaO}_6$   $[\text{M}+\text{Na}]^+$  485.1683, found 485.1687. The *ee* value was 76%,  $t_R$  (minor) = 49.579 min,  $t_R$  (major) = 70.430 min (Chiralpak IC,  $\lambda = 220$  nm, 20.0% *i*PrOH/hexane, flow rate = 1.0 mL/min).

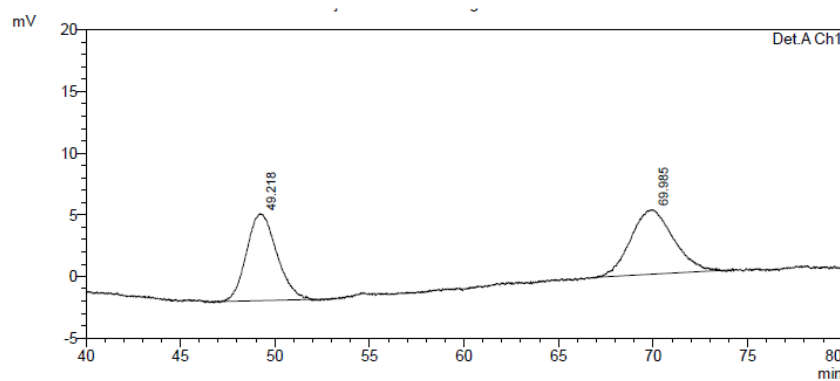

1 Det.A Ch1/220nm

PeakTable

| Peak# | Ret. Time | Area    | Height | Area %  | Height % |
|-------|-----------|---------|--------|---------|----------|
| 1     | 49.218    | 781448  | 7042   | 48.664  | 57.342   |
| 2     | 69.985    | 824361  | 5239   | 51.336  | 42.658   |
| Total |           | 1605810 | 12281  | 100.000 | 100.000  |

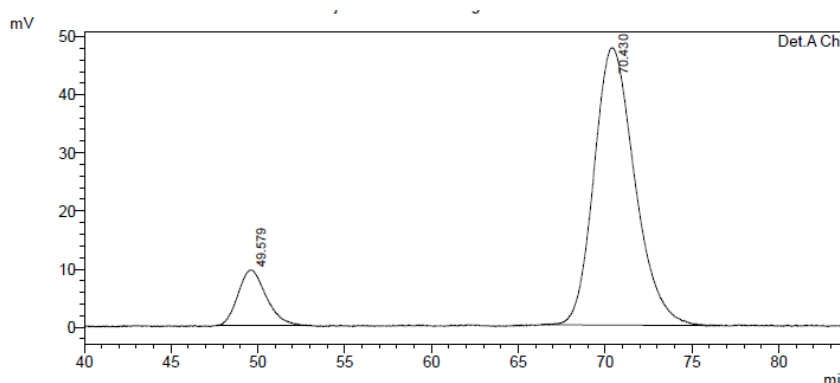

1 Det.A Ch1/220nm

PeakTable

| Peak# | Ret. Time | Area    | Height | Area %  | Height % |
|-------|-----------|---------|--------|---------|----------|
| 1     | 49.579    | 1079342 | 9540   | 12.165  | 16.657   |
| 2     | 70.430    | 7793379 | 47729  | 87.835  | 83.343   |
| Total |           | 8872721 | 57269  | 100.000 | 100.000  |

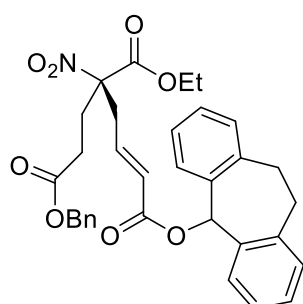

### 1-Benzyl

### 6-(10,11-dihydro-5H-dibenzo[*a,d*][7]annulen-5-yl)

### 3-ethyl (*R,E*)-3-nitrohex-5-ene-1,3,6-tricarboxylate (4k)

Colourless oil;  $[\alpha]_D^{25} = 1.3$  ( $c = 2.0, \text{CHCl}_3$ );  $^1\text{H}$  NMR (500 MHz,  $\text{CDCl}_3$ ):  $\delta = 7.42$  (d,  $J = 7.5$  Hz, 2H), 7.36–7.33 (m,

5H), 7.26–7.23 (m, 2H), 7.19–7.16 (m, 4H), 6.93 (s, 1H), 6.74 (dt,  $J = 15.5, 7.5$  Hz, 1H), 5.97 (d,  $J = 15.5$  Hz, 1H), 5.11 (s, 2H), 4.25–4.20 (m, 2H), 3.59–3.54 (m, 2H), 3.05–3.02 (m, 4H), 2.55–2.42 (m, 4H), 1.21 (t,  $J = 7.0$  Hz, 3H) ppm.  $^{13}\text{C}$  NMR (125 MHz,  $\text{CDCl}_3$ ):  $\delta = 171.31, 165.55, 164.17, 140.28, 139.00, 136.42, 135.54, 130.49, 130.02, 129.00, 128.75, 128.57, 128.52, 127.31, 126.30, 93.93, 79.75, 67.00, 63.48, 37.59, 32.52, 29.49, 28.88, 13.87$  ppm. HRMS (ESI)  $m/z$  calcd for  $\text{C}_{33}\text{H}_{33}\text{NNaO}_8$   $[\text{M}+\text{Na}]^+$  594.2098, found 594.2089. The *ee* value was 85%,  $t_{\text{R}}$  (minor) = 17.799 min,  $t_{\text{R}}$  (major) = 20.407 min (Chiralpak IA,  $\lambda = 220$  nm, 10.0% *i*PrOH/hexane, flow rate = 1.0 mL/min).

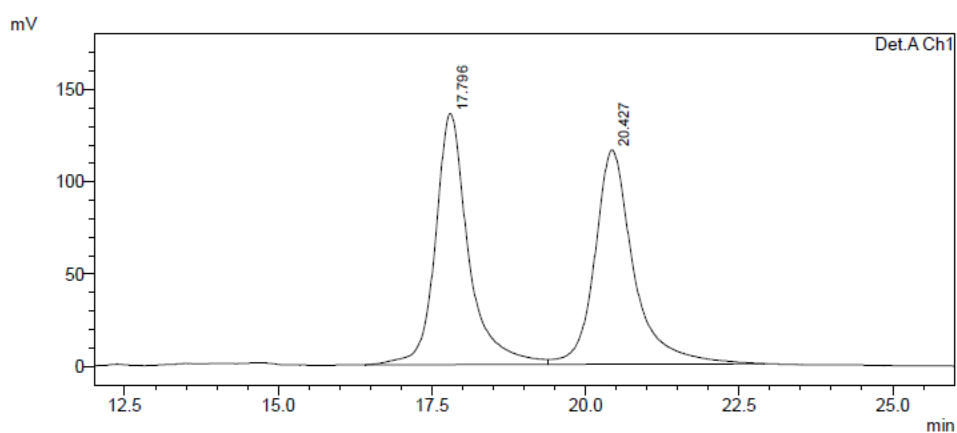

1 Det.A Ch1/220nm

PeakTable

Detector A Ch1 220nm

| Peak# | Ret. Time | Area     | Height | Area %  | Height % |
|-------|-----------|----------|--------|---------|----------|
| 1     | 17.796    | 5112479  | 135750 | 50.034  | 53.956   |
| 2     | 20.427    | 5105512  | 115843 | 49.966  | 46.044   |
| Total |           | 10217991 | 251593 | 100.000 | 100.000  |

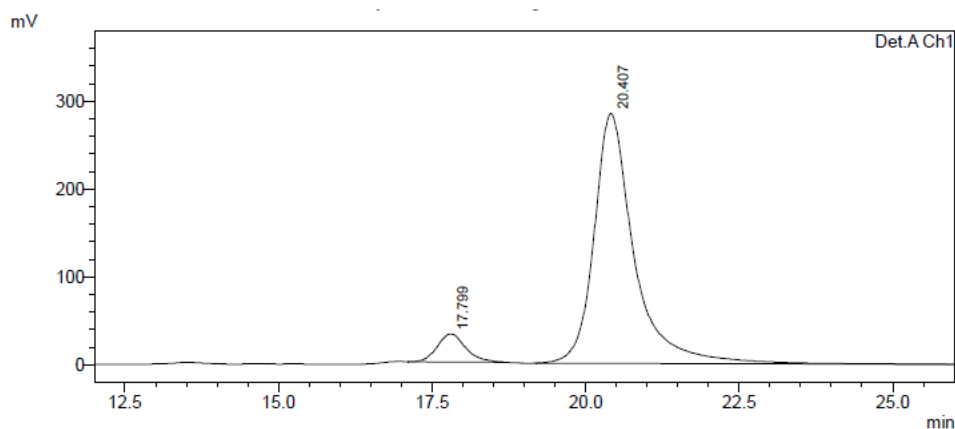

1 Det.A Ch1/220nm

PeakTable

Detector A Ch1 220nm

| Peak# | Ret. Time | Area     | Height | Area %  | Height % |
|-------|-----------|----------|--------|---------|----------|
| 1     | 17.799    | 1034228  | 32214  | 7.345   | 10.160   |
| 2     | 20.407    | 13045641 | 284849 | 92.655  | 89.840   |
| Total |           | 14079869 | 317063 | 100.000 | 100.000  |

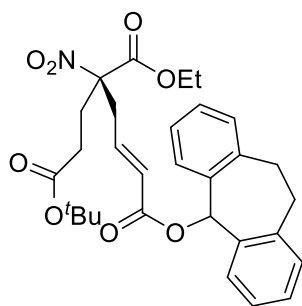

**1-(*tert*-Butyl)**

**6-(10,11-dihydro-5*H*-dibenzo[*a,d*][7]annulen-5-yl)**

**3-ethyl (*R,E*)-3-nitrohex-5-ene-1,3,6-tricarboxylate (4I)**

Colourless oil;  $[\alpha]_D^{25} = 1.6$  ( $c = 2.0$ ,  $\text{CHCl}_3$ );  $^1\text{H NMR}$  (500 MHz,  $\text{CDCl}_3$ ):  $\delta = 7.42$  (d,  $J = 7.5$  Hz, 2H), 7.26–7.23 (m, 2H), 7.18–7.16 (m, 4H), 6.93 (s, 1H), 6.75 (dt,  $J = 15.5, 7.5$  Hz, 1H), 5.97 (d,  $J = 15.5$  Hz, 1H), 4.26–4.22 (m, 2H), 3.58–3.54 (m, 2H), 3.04–3.02 (m, 4H), 2.48–2.44 (m, 2H), 2.30–2.26 (m, 2H), 1.42 (s, 9H), 1.23 (t,  $J = 7.0$  Hz, 3H) ppm.  $^{13}\text{C NMR}$  (125 MHz,  $\text{CDCl}_3$ ):  $\delta = 170.65, 165.68, 164.21, 140.27, 139.19, 136.47, 130.49, 130.01, 129.00, 127.22, 126.30, 94.09, 81.49, 79.72, 63.40, 37.45, 32.53, 29.92, 29.56, 28.14, 13.90$  ppm. HRMS (ESI)  $m/z$  calcd for  $\text{C}_{30}\text{H}_{35}\text{NNaO}_8$   $[\text{M}+\text{Na}]^+$  560.2255, found 560.2257. The *ee* value was 87%,  $t_R$  (minor) = 20.282 min,  $t_R$  (major) = 23.610 min (Chiralpak IC,  $\lambda = 220$  nm, 5.0% *i*PrOH/hexane, flow rate = 1.0 mL/min).

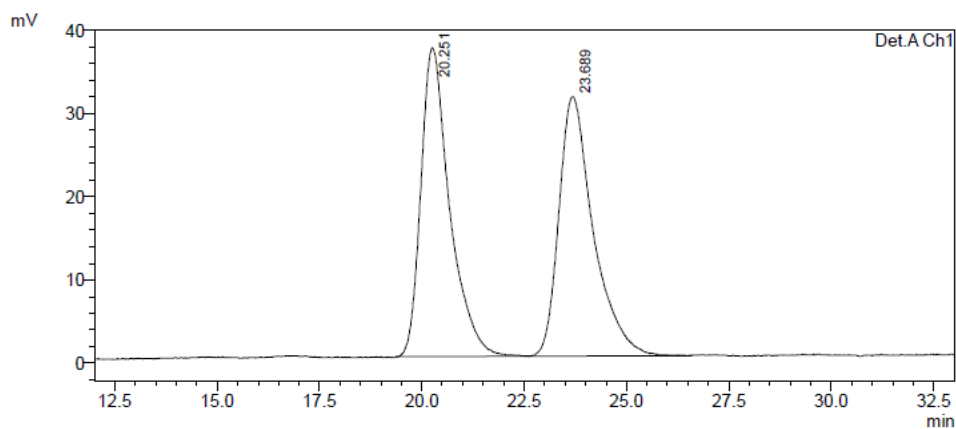

1 Det.A Ch1/220nm

PeakTable

| Peak# | Ret. Time | Area    | Height | Area %  | Height % |
|-------|-----------|---------|--------|---------|----------|
| 1     | 20.251    | 1813722 | 37126  | 49.879  | 54.350   |
| 2     | 23.689    | 1822521 | 31183  | 50.121  | 45.650   |
| Total |           | 3636243 | 68309  | 100.000 | 100.000  |

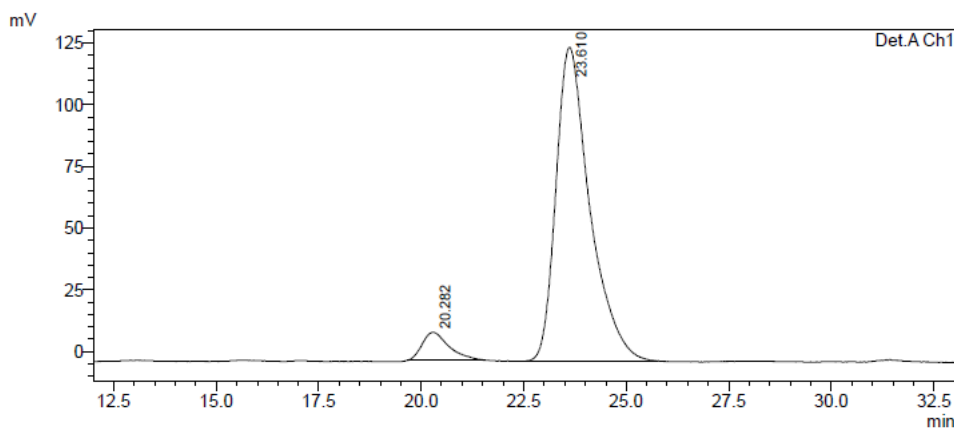

PeakTable

| Peak# | Ret. Time | Area    | Height | Area %  | Height % |
|-------|-----------|---------|--------|---------|----------|
| 1     | 20.282    | 508813  | 11274  | 6.496   | 8.144    |
| 2     | 23.610    | 7324419 | 127158 | 93.504  | 91.856   |
| Total |           | 7833232 | 138432 | 100.000 | 100.000  |

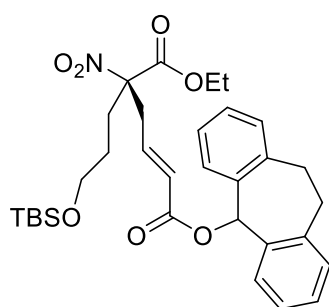

**1-(10,11-Dihydro-5H-dibenzo[*a,d*][7]annulen-5-yl)  
6-ethyl (*R,E*)-5-(3-((*tert*-butyldimethylsilyl)oxy)  
propyl)-5-nitrohex-2-enedioate (4m)**

Colourless oil;  $[\alpha]_D^{25} = 4.9$  ( $c = 2.0$ ,  $\text{CHCl}_3$ );  $^1\text{H}$  NMR (500 MHz,  $\text{CDCl}_3$ ):  $\delta = 7.42$  (d,  $J = 7.5$  Hz, 2H), 7.26–7.23 (m, 2H), 7.19–7.16 (m, 4H), 6.93 (s, 1H), 6.74 (dt,  $J = 15.5, 7.5$  Hz, 1H), 5.97 (d,  $J = 15.5$  Hz, 1H), 4.24 (q,  $J = 7.0$  Hz, 2H), 3.61–3.52 (m, 4H), 3.06–2.99 (m, 4H), 2.29–2.18 (m, 2H), 1.51–1.36 (m, 2H), 1.22 (t,  $J = 7.0$  Hz, 3H), 0.85 (s, 9H), 0.01 (s, 6H) ppm.  $^{13}\text{C}$  NMR (125 MHz,  $\text{CDCl}_3$ ):  $\delta = 166.08, 164.26, 140.27, 139.58, 136.49, 130.47, 130.01, 128.98, 126.94, 126.29, 94.84, 79.62, 63.17, 62.07, 36.83, 32.53, 30.97, 27.00, 25.96, 18.35, 13.92, -5.27$  ppm. HRMS (ESI)  $m/z$  calcd for  $\text{C}_{32}\text{H}_{43}\text{NNaO}_7\text{Si}$   $[\text{M}+\text{Na}]^+$  604.2701, found 604.2706. The *ee* value was 93%,  $t_R$  (minor) = 7.520 min,  $t_R$  (major) = 8.650 min (Chiralpak IC,  $\lambda = 220$  nm, 5.0% *i*PrOH/hexane, flow rate = 1.0 mL/min).

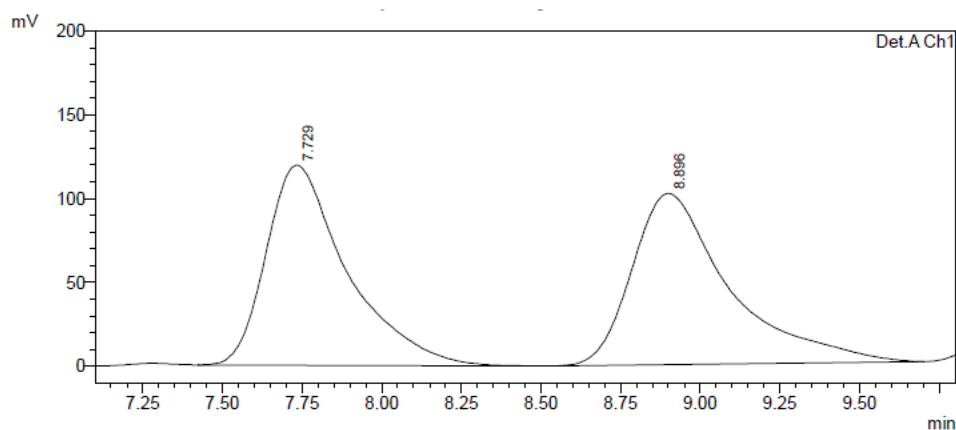

PeakTable

| Peak# | Ret. Time | Area    | Height | Area %  | Height % |
|-------|-----------|---------|--------|---------|----------|
| 1     | 7.729     | 2107076 | 119488 | 49.291  | 53.901   |
| 2     | 8.896     | 2167717 | 102194 | 50.709  | 46.099   |
| Total |           | 4274793 | 221681 | 100.000 | 100.000  |

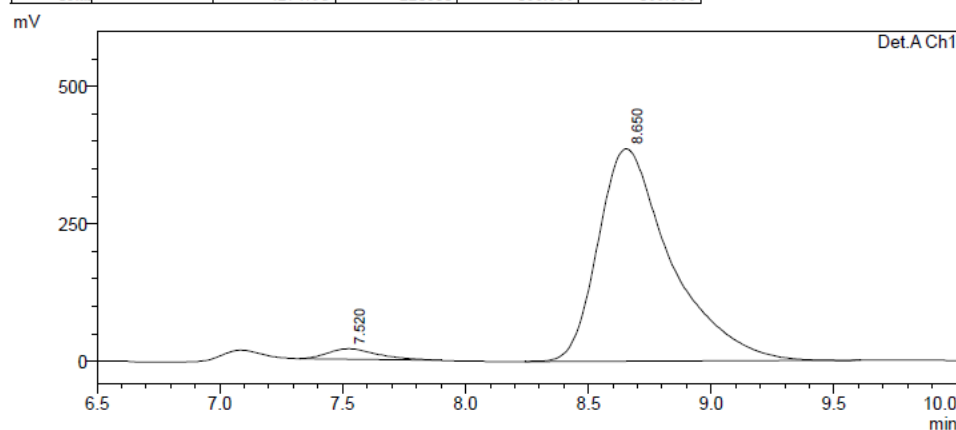

PeakTable

| Peak# | Ret. Time | Area    | Height | Area %  | Height % |
|-------|-----------|---------|--------|---------|----------|
| 1     | 7.520     | 267178  | 19039  | 3.241   | 4.702    |
| 2     | 8.650     | 7976515 | 385852 | 96.759  | 95.298   |
| Total |           | 8243693 | 404891 | 100.000 | 100.000  |

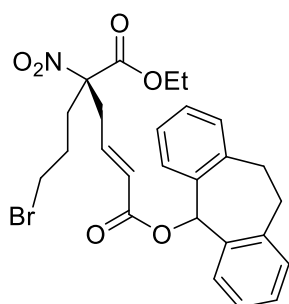

**1-(10,11-Dihydro-5H-dibenzo[a,d][7]annulen-5-yl) 6-ethyl (R,E)-5-(3-bromopropyl)-5-nitrohex-2-enedioate (4n)**

Colourless oil;  $[\alpha]_D^{25} = -1.9$  ( $c = 2.0$ ,  $\text{CHCl}_3$ );  $^1\text{H NMR}$  (500 MHz,  $\text{CDCl}_3$ ):  $\delta = 7.42$  (d,  $J = 7.5$  Hz, 2H), 7.26–7.23 (m, 2H), 7.19–7.16 (m, 4H), 6.93 (s, 1H), 6.73 (dt,  $J = 15.5, 7.5$  Hz, 1H), 5.99 (d,  $J = 15.5$  Hz, 1H), 4.26 (q,  $J = 7.0$  Hz, 2H), 3.58–3.52 (m, 2H), 3.41–3.34 (m, 2H), 3.10–3.00 (m, 4H), 2.37–2.27 (m, 2H), 1.89–1.76 (m, 2H), 1.24 (t,  $J = 7.0$  Hz, 3H) ppm.  $^{13}\text{C NMR}$  (125 MHz,  $\text{CDCl}_3$ ):  $\delta = 165.73, 164.19, 140.28, 138.98, 136.44, 130.50, 130.00, 129.01, 127.34, 126.32, 94.23, 79.76, 63.45, 36.99, 32.97, 32.55, 31.96, 26.95, 13.94$  ppm. HRMS (ESI)  $m/z$  calcd for

$C_{26}H_{28}^{79}BrNNaO_6 [M+Na]^+$  552.0992, found 552.0997,  $C_{26}H_{28}^{81}BrNNaO_6 [M+Na]^+$  554.0972, found 554.0968. The *ee* value was 89%,  $t_R$  (minor) = 15.478 min,  $t_R$  (major) = 19.785 min (Chiralpak IC,  $\lambda = 220$  nm, 10.0% *i*PrOH/hexane, flow rate = 1.0 mL/min).

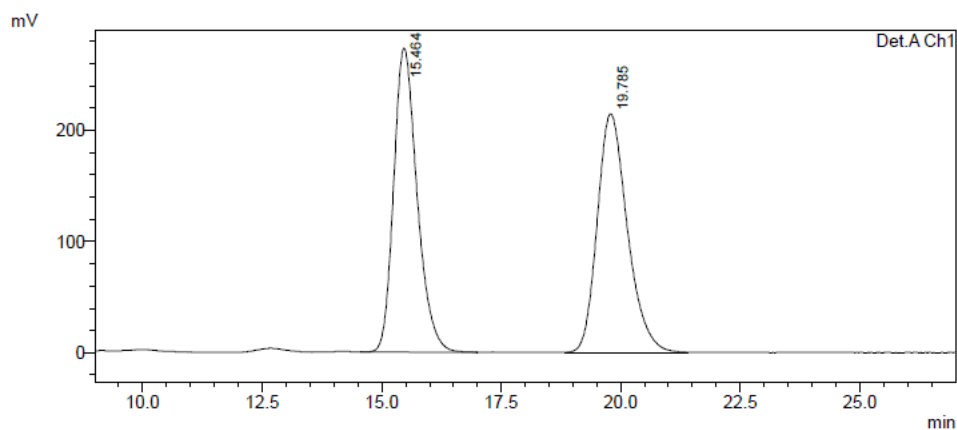

1 Det.A Ch1/220nm

PeakTable

Detector A Ch1 220nm

| Peak# | Ret. Time | Area     | Height | Area %  | Height % |
|-------|-----------|----------|--------|---------|----------|
| 1     | 15.464    | 9323376  | 273593 | 49.776  | 56.027   |
| 2     | 19.785    | 9407119  | 214731 | 50.224  | 43.973   |
| Total |           | 18730496 | 488324 | 100.000 | 100.000  |

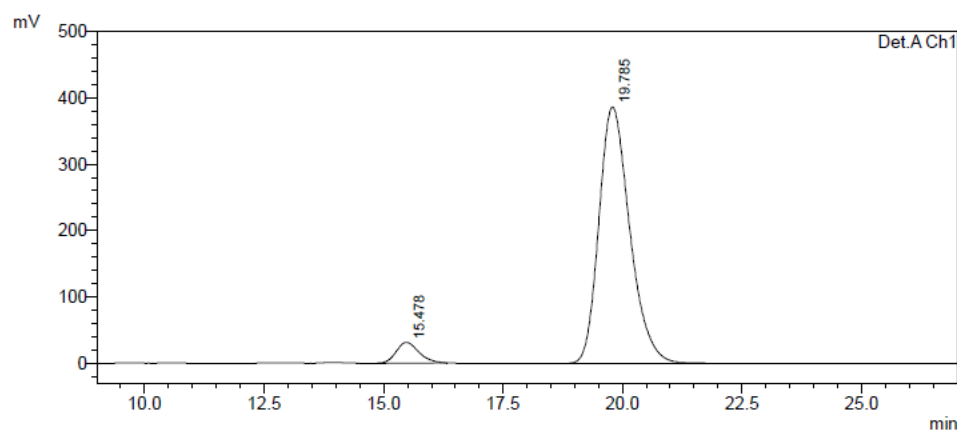

1 Det.A Ch1/220nm

PeakTable

Detector A Ch1 220nm

| Peak# | Ret. Time | Area     | Height | Area %  | Height % |
|-------|-----------|----------|--------|---------|----------|
| 1     | 15.478    | 1023678  | 31192  | 5.567   | 7.469    |
| 2     | 19.785    | 17365867 | 386421 | 94.433  | 92.531   |
| Total |           | 18389545 | 417613 | 100.000 | 100.000  |

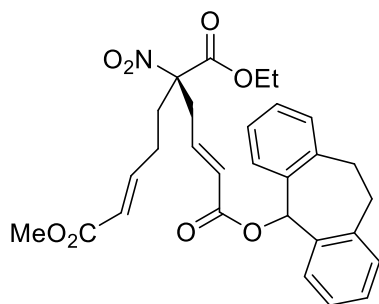

**1-(10,11-Dihydro-5H-dibenzo[*a,d*][7]annulen-5-yl)  
4-ethyl 8-methyl (*R,1E,7E*)-4-nitroocta-1,7-  
diene-1,4,8-tricarboxylate (4o)**

Colourless oil;  $[\alpha]_D^{25} = 1.5$  ( $c = 2.0$ ,  $CHCl_3$ );  $^1H$  NMR (500 MHz,  $CDCl_3$ ):  $\delta = 7.41$  (d,  $J = 7.5$  Hz, 2H), 7.26–7.23 (m, 2H), 7.19–7.16 (m, 4H), 6.92 (s, 1H),



6.85 (dt,  $J = 15.5, 6.5$  Hz, 1H), 6.71 (dt,  $J = 15.5, 7.5$  Hz, 1H), 5.98 (d,  $J = 15.5$  Hz, 1H), 5.84 (dt,  $J = 15.5, 1.5$  Hz, 1H), 4.25 (q,  $J = 7.0$  Hz, 2H), 3.73 (s, 3H), 3.58–3.52 (m, 2H), 3.07–3.00 (m, 4H), 2.37–2.16 (m, 4H), 1.23 (t,  $J = 7.0$  Hz, 3H) ppm.  $^{13}\text{C}$  NMR (125 MHz,  $\text{CDCl}_3$ ):  $\delta = 166.54, 165.62, 164.17, 145.44, 140.30, 138.99, 136.38, 130.50, 130.07, 129.03, 127.30, 126.31, 122.72, 94.15, 79.86, 63.48, 51.73, 37.06, 32.56, 32.52, 26.35, 13.91$  ppm. HRMS (ESI)  $m/z$  calcd for  $\text{C}_{29}\text{H}_{31}\text{NNaO}_8$   $[\text{M}+\text{Na}]^+$  544.1942, found 544.1947. The  $ee$  value was 84%,  $t_R$  (minor) = 27.627 min,  $t_R$  (major) = 33.201 min (Chiralpak IC,  $\lambda = 220$  nm, 20.0%  $i\text{PrOH}$ /hexane, flow rate = 1.0 mL/min).

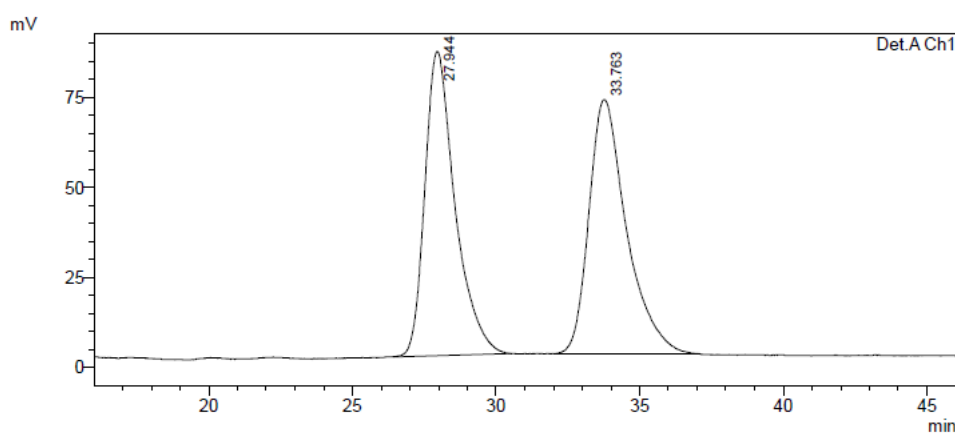

1 Det.A Ch1/220nm

PeakTable

Detector A Ch1 220nm

| Peak# | Ret. Time | Area     | Height | Area %  | Height % |
|-------|-----------|----------|--------|---------|----------|
| 1     | 27.944    | 6183086  | 84528  | 49.002  | 54.453   |
| 2     | 33.763    | 6434825  | 70702  | 50.998  | 45.547   |
| Total |           | 12617911 | 155230 | 100.000 | 100.000  |

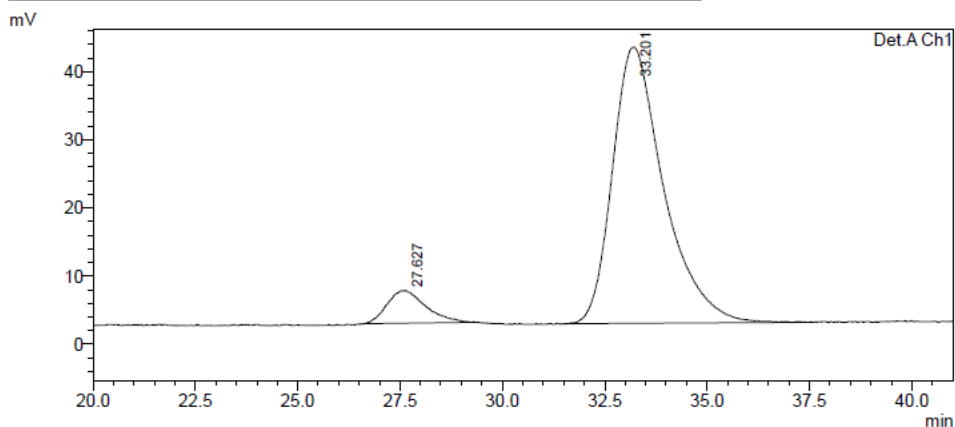

1 Det.A Ch1/220nm

PeakTable

Detector A Ch1 220nm

| Peak# | Ret. Time | Area    | Height | Area %  | Height % |
|-------|-----------|---------|--------|---------|----------|
| 1     | 27.627    | 313237  | 4795   | 8.166   | 10.587   |
| 2     | 33.201    | 3522670 | 40493  | 91.834  | 89.413   |
| Total |           | 3835907 | 45288  | 100.000 | 100.000  |

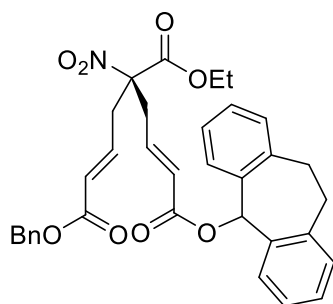

**1-Benzyl 7-(10,11-dihydro-5H-dibenzo[*a,d*][7]annulen-5-yl) 4-ethyl (*R,1E,6E*)-4-nitrohepta-1,6-diene-1,4,7-tricarboxylate (4p)**

Colourless oil;  $[\alpha]_D^{25} = -1.2$  ( $c = 2.0$ ,  $\text{CHCl}_3$ );  $^1\text{H NMR}$  (500 MHz,  $\text{CDCl}_3$ ):  $\delta = 7.42$  (d,  $J = 7.0$  Hz, 2H), 7.39–7.32 (m, 5H), 7.27–7.24 (m, 2H), 7.19–7.16 (m, 4H), 6.93 (s, 1H), 6.77–6.69 (m, 2H), 6.01–5.97 (m, 2H), 5.17 (s, 2H), 4.25 (q,  $J = 7.0$  Hz, 2H), 3.58–3.52 (m, 2H), 3.10–2.99 (m, 6H), 1.21 (t,  $J = 7.0$  Hz, 3H) ppm.  $^{13}\text{C NMR}$  (125 MHz,  $\text{CDCl}_3$ ):  $\delta = 165.12, 165.08, 164.12, 140.29, 138.75, 138.65, 136.37, 135.73, 130.50, 130.04, 129.03, 128.72, 128.49, 128.43, 127.57, 127.17, 126.30, 93.57, 79.85, 66.68, 63.68, 36.89, 36.83, 32.50, 13.88$  ppm. HRMS (ESI)  $m/z$  calcd for  $\text{C}_{34}\text{H}_{33}\text{NNaO}_8$   $[\text{M}+\text{Na}]^+$  606.2098, found 606.2091. The *ee* value was 88%,  $t_R$  (major) = 42.690 min,  $t_R$  (minor) = 48.545 min (Chiralpak IF,  $\lambda = 220$  nm, 5.0% *i*PrOH/hexane, flow rate = 1.0 mL/min).

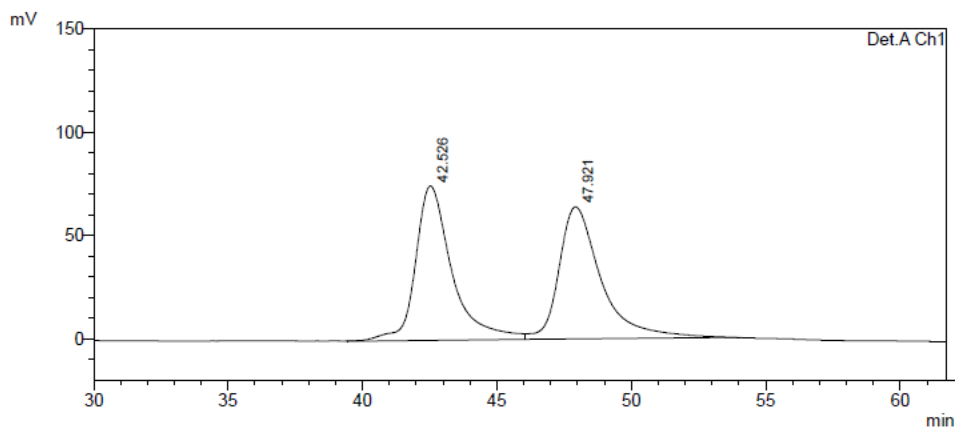

1 Det.A Ch1/220nm

PeakTable

| Detector A Ch1 220nm |           |          |        |         |          |  |
|----------------------|-----------|----------|--------|---------|----------|--|
| Peak#                | Ret. Time | Area     | Height | Area %  | Height % |  |
| 1                    | 42.526    | 7060116  | 74671  | 50.182  | 53.885   |  |
| 2                    | 47.921    | 7008950  | 63904  | 49.818  | 46.115   |  |
| Total                |           | 14069067 | 138576 | 100.000 | 100.000  |  |

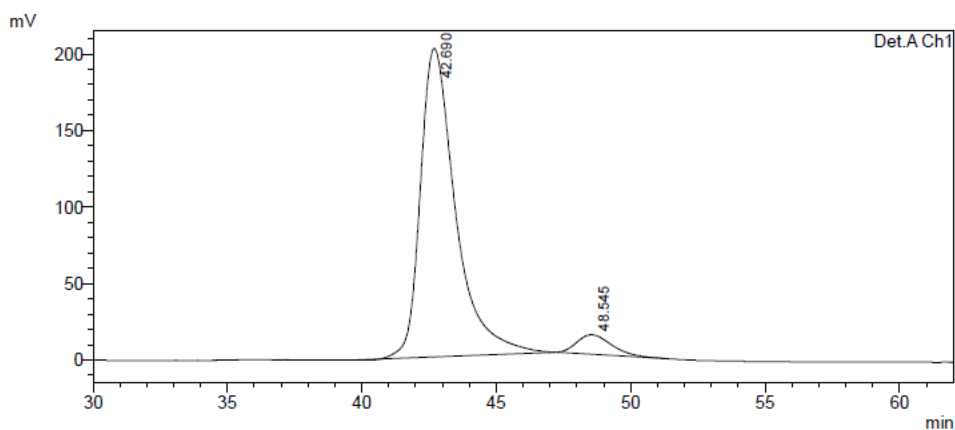

Detector A Ch1 220nm

PeakTable

| Peak# | Ret. Time | Area     | Height | Area %  | Height % |
|-------|-----------|----------|--------|---------|----------|
| 1     | 42.690    | 18426673 | 201562 | 94.105  | 94.048   |
| 2     | 48.545    | 1154260  | 12755  | 5.895   | 5.952    |
| Total |           | 19580933 | 214318 | 100.000 | 100.000  |

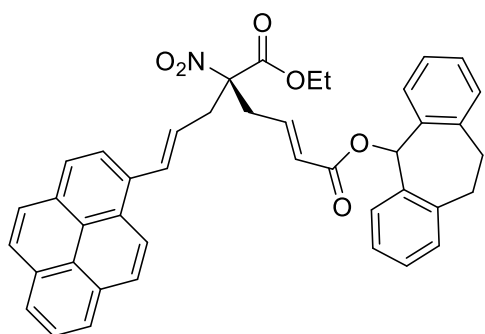

**1-(10,11-Dihydro-5H-dibenzo[*a,d*][7]annulen-5-yl)-6-ethyl-(*R,E*)-5-nitro-5-((*E*)-3-(pyren-1-yl)allyl)hex-2-enedioate (4q)**

Yellow oil;  $[\alpha]_D^{25} = 1.0$  ( $c = 2.0$ ,  $\text{CHCl}_3$ );  $^1\text{H}$  NMR (500 MHz,  $\text{CDCl}_3$ ):  $\delta = 8.23$  (d,  $J = 9.0$

Hz, 1H), 8.18 (t,  $J = 8.5$  Hz, 2H), 8.10 (d,  $J = 8.0$  Hz, 1H), 8.07–7.99 (m, 5H), 7.55 (d,  $J = 15.5$  Hz, 1H), 7.46 (d,  $J = 7.5$  Hz, 2H), 7.28–7.24 (m, 2H), 7.19–7.18 (m, 4H), 6.98 (s, 1H), 6.92–6.84 (m, 1H), 6.15 (dt,  $J = 15.0, 7.5$  Hz, 1H), 6.08 (d,  $J = 15.5$  Hz, 1H), 4.30 (q,  $J = 7.0$  Hz, 2H), 3.59–3.54 (m, 2H), 3.36–3.24 (m, 2H), 3.20 (d,  $J = 7.5$  Hz, 2H), 3.05–3.00 (m, 2H), 1.25 (t,  $J = 7.0$  Hz, 3H). ppm.  $^{13}\text{C}$  NMR (125 MHz,  $\text{CDCl}_3$ ):  $\delta = 165.77, 164.35, 140.28, 139.52, 136.50, 134.22, 131.55, 131.30, 130.96, 130.88, 130.51, 130.50, 130.03, 129.02, 128.22, 128.02, 127.65, 127.50, 127.26, 126.33, 126.18, 125.56, 125.32, 125.12, 124.93, 124.25, 123.43, 122.83, 94.61, 79.80, 63.45, 38.63, 36.87, 32.53, 14.00$  ppm. HRMS (ESI)  $m/z$  calcd for  $\text{C}_{42}\text{H}_{35}\text{NNaO}_6$   $[\text{M}+\text{Na}]^+$  672.2357, found 672.2348. The *ee* value was 90%,  $t_R$  (minor) = 23.691 min,  $t_R$  (major) = 28.031 min (Chiralpak IA,  $\lambda = 220$  nm, 5.0% *i*PrOH/hexane, flow rate = 1.0 mL/min).

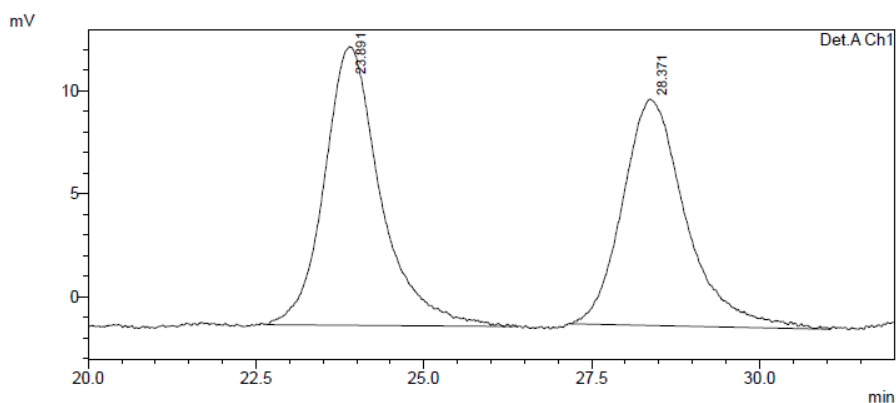

PeakTable

| Peak# | Ret. Time | Area    | Height | Area %  | Height % |
|-------|-----------|---------|--------|---------|----------|
| 1     | 23.891    | 784034  | 13546  | 52.240  | 55.185   |
| 2     | 28.371    | 716789  | 11001  | 47.760  | 44.815   |
| Total |           | 1500823 | 24547  | 100.000 | 100.000  |

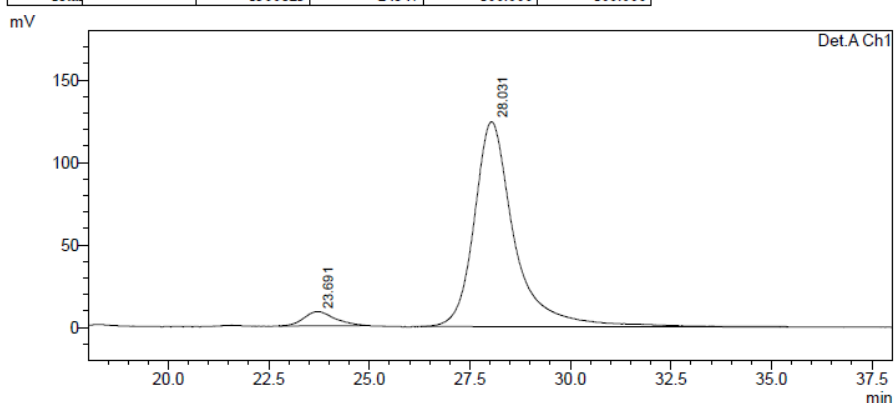

PeakTable

| Peak# | Ret. Time | Area    | Height | Area %  | Height % |
|-------|-----------|---------|--------|---------|----------|
| 1     | 23.691    | 460030  | 8620   | 5.040   | 6.480    |
| 2     | 28.031    | 8668170 | 124409 | 94.960  | 93.520   |
| Total |           | 9128200 | 133029 | 100.000 | 100.000  |

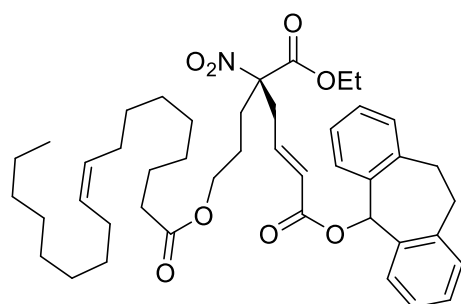

**1-(10,11-Dihydro-5H-dibenzo[*a,d*][7]annulen-5-yl) 6-ethyl (*R,E*)-5-nitro-5-(3-(oleoyloxy)propyl)hex-2-enedioate (4r)**

Colourless oil;  $[\alpha]_D^{25} = 1.4$  ( $c = 2.0$ ,  $\text{CHCl}_3$ );  $^1\text{H}$  NMR (500 MHz,  $\text{CDCl}_3$ ):  $\delta = 7.41$  (d,  $J = 7.5$  Hz, 2H), 7.26–7.23 (m, 2H), 7.19–7.16 (m, 4H), 6.93 (s, 1H), 6.73 (dt,  $J = 15.5, 7.5$  Hz, 1H), 5.98 (d,  $J = 15.5$  Hz, 1H), 5.36–5.34 (m, 2H), 4.25 (q,  $J = 7.0$  Hz, 2H), 4.05 (t,  $J = 6.5$  Hz, 2H), 3.58–3.52 (m, 2H), 3.06–3.00 (m, 4H), 2.30–2.17 (m, 4H), 2.04–2.00 (m, 4H), 1.65–1.51 (m, 5H), 1.33–1.27 (m, 19H), 1.23 (t,  $J = 7.0$  Hz, 3H), 0.88 (t,  $J = 7.0$  Hz, 3H) ppm.  $^{13}\text{C}$  NMR (125 MHz,  $\text{CDCl}_3$ ):  $\delta = 173.78, 165.80, 164.21, 140.26, 139.23, 136.46, 136.43, 130.49, 130.14,$

130.00, 129.89, 129.02, 127.14, 126.31, 94.44, 79.73, 63.36, 63.03, 36.86, 34.25, 32.52, 32.04, 31.02, 29.91, 29.85, 29.66, 29.46, 29.45, 29.31, 29.26, 29.24, 27.36, 27.32, 25.01, 23.19, 22.81, 14.25, 13.92 ppm. HRMS (ESI)  $m/z$  calcd for  $C_{44}H_{61}NNaO_8$   $[M+Na]^+$  754.4289, found 754.4283. The *ee* value was 92%,  $t_R$  (minor) = 19.458 min,  $t_R$  (major) = 24.672 min (Chiralpak IC,  $\lambda$  = 220 nm, 5.0% *i*PrOH/hexane, flow rate = 1.0 mL/min).

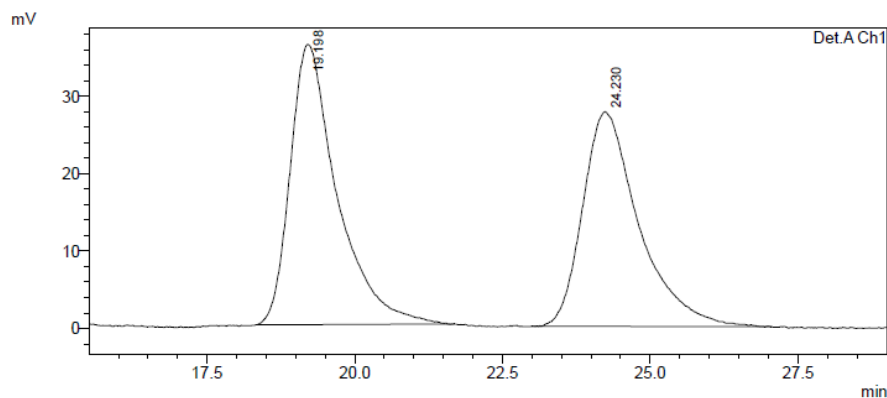

PeakTable

| Peak# | Ret. Time | Area    | Height | Area %  | Height % |
|-------|-----------|---------|--------|---------|----------|
| 1     | 19.198    | 1997595 | 36212  | 52.121  | 56.620   |
| 2     | 24.230    | 1835006 | 27745  | 47.879  | 43.380   |
| Total |           | 3832601 | 63957  | 100.000 | 100.000  |

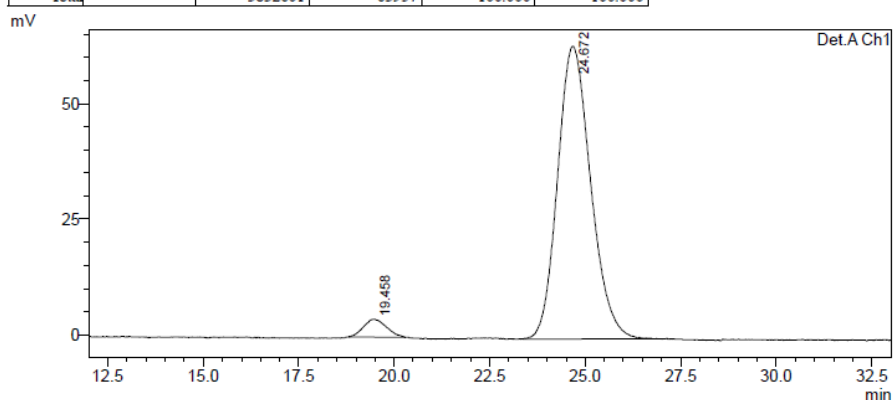

PeakTable

| Peak# | Ret. Time | Area    | Height | Area %  | Height % |
|-------|-----------|---------|--------|---------|----------|
| 1     | 19.458    | 161668  | 3883   | 4.054   | 5.774    |
| 2     | 24.672    | 3826479 | 63356  | 95.946  | 94.226   |
| Total |           | 3988147 | 67238  | 100.000 | 100.000  |

## V. Synthetic manipulation of the product.

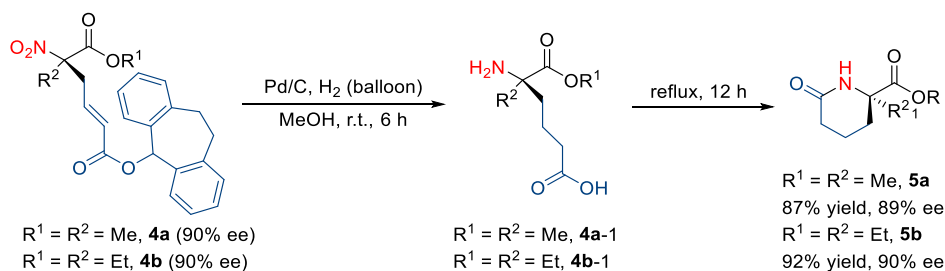

A stirred solution of **4a** (40.9 mg, 0.1 mmol) in MeOH (2 mL) was added Pd/C (10 mg) under the H<sub>2</sub> balloon. The mixture was stirred at room temperature for 6 h, and then the mixture was refluxed directly at 70 °C for 12 h. After completion of the reaction indicated by TLC, the mixture to a silica gel chromatography column (silica gel, PE/EtOAc = 1/1) to afford the desired product **5a** as colorless oil (14.9 mg, 87% yield);  $[\alpha]_D^{25} = 3.3$  (c = 2.0, CHCl<sub>3</sub>); <sup>1</sup>H NMR (500 MHz, CDCl<sub>3</sub>):  $\delta = 3.81$  (s, 3H), 2.47–2.37 (m, 2H), 2.32–2.25 (m, 1H), 2.23–2.17 (m, 1H), 1.80 (s, 3H), 1.73–1.64 (m, 1H), 1.61–1.52 (m, 1H) ppm. <sup>13</sup>C NMR (125 MHz, CDCl<sub>3</sub>):  $\delta = 178.52, 167.86, 92.41, 53.70, 35.80, 33.39, 21.35, 19.01$  ppm. HRMS (ESI) m/z calcd for C<sub>8</sub>H<sub>13</sub>NNaO<sub>3</sub> [M+Na]<sup>+</sup> 194.0788, found 194.0787. The *ee* value was 89%, *t<sub>R</sub>* (minor) = 14.945 min, *t<sub>R</sub>* (major) = 16.874 min (Chiralpak ID,  $\lambda = 210$  nm, 5.0% *i*PrOH/hexane, flow rate = 1.0 mL/min).

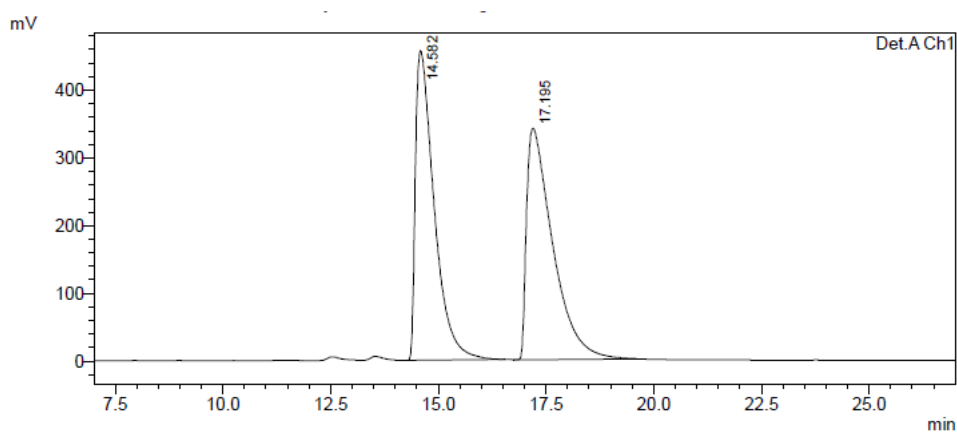

1 Det.A Ch1/210nm

PeakTable

Detector A Ch1 210nm

| Peak# | Ret. Time | Area     | Height | Area %  | Height % |
|-------|-----------|----------|--------|---------|----------|
| 1     | 14.582    | 13866471 | 456992 | 48.973  | 57.232   |
| 2     | 17.195    | 14448201 | 341499 | 51.027  | 42.768   |
| Total |           | 28314672 | 798491 | 100.000 | 100.000  |

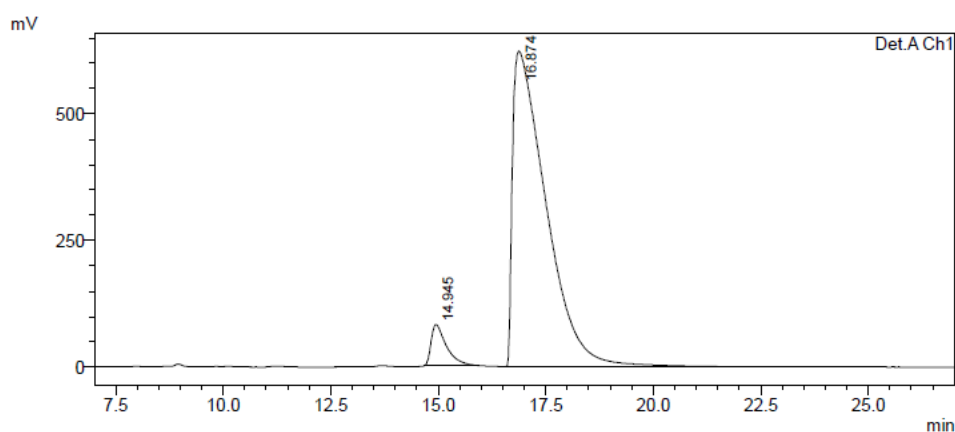

1 Det.A Ch1/210nm

PeakTable

| Peak# | Ret. Time | Area     | Height | Area %  | Height % |
|-------|-----------|----------|--------|---------|----------|
| 1     | 14.945    | 1997493  | 80979  | 5.600   | 11.507   |
| 2     | 16.874    | 33672672 | 622781 | 94.400  | 88.493   |
| Total |           | 35670166 | 703760 | 100.000 | 100.000  |

A stirred solution of **4b** (50.0 mg, 0.11 mmol) in MeOH (2 mL) was added Pd/C (10 mg) under the H<sub>2</sub> balloon. The mixture was stirred at room temperature for 6 h, and then the mixture was refluxed directly at 70 °C for 12 h. After completion of the reaction indicated by TLC, the mixture to a silica gel chromatography column (silica gel, PE/EtOAc = 1/1) to afford the desired product **5b** as colorless oil (21.1 mg, 92% yield);  $[\alpha]_D^{25} = -2.5$  (c = 2.0, CHCl<sub>3</sub>); <sup>1</sup>H NMR (500 MHz, CDCl<sub>3</sub>): δ = 4.27 (q, *J* = 7.0 Hz, 2H), 2.42 (td, *J* = 7.0, 2.0 Hz, 2H), 2.35–2.18 (m, 4H), 1.65–1.47 (m, 2H), 1.29 (t, *J* = 7.0 Hz, 3H), 0.91 (t, *J* = 7.0 Hz, 3H) ppm. <sup>13</sup>C NMR (125 MHz, CDCl<sub>3</sub>): δ = 177.87, 166.83, 96.36, 62.87, 33.29, 32.44, 27.07, 18.76, 14.00, 8.01 ppm. HRMS (ESI) *m/z* calcd for C<sub>10</sub>H<sub>17</sub>NNaO<sub>3</sub> [M+Na]<sup>+</sup> 222.1101, found 222.1110. The *ee* value was 90%, *t<sub>R</sub>* (minor) = 29.002 min, *t<sub>R</sub>* (major) = 44.404 min (Chiralpak IF, λ = 210 nm, 5.0% *i*PrOH/hexane, flow rate = 1.0 mL/min).

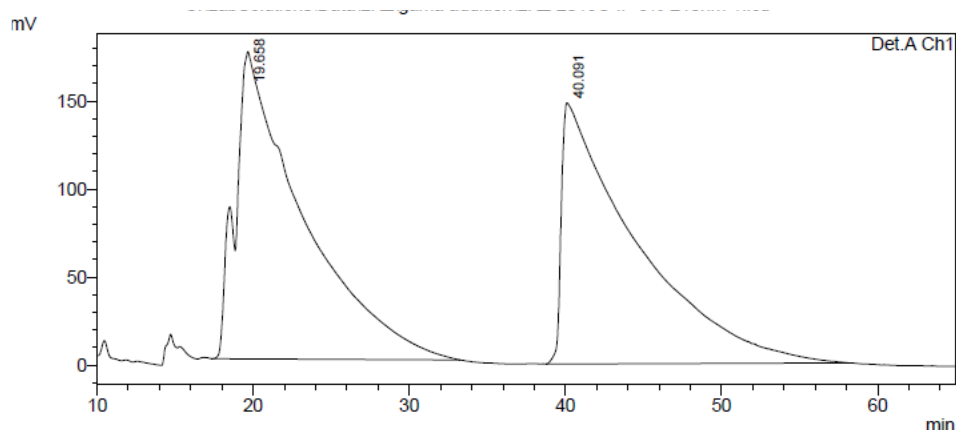

| Peak# | Ret. Time | Area      | Height | Area %  | Height % |
|-------|-----------|-----------|--------|---------|----------|
| 1     | 19.658    | 52405375  | 174622 | 51.700  | 54.071   |
| 2     | 40.091    | 48959682  | 148328 | 48.300  | 45.929   |
| Total |           | 101365056 | 322950 | 100.000 | 100.000  |

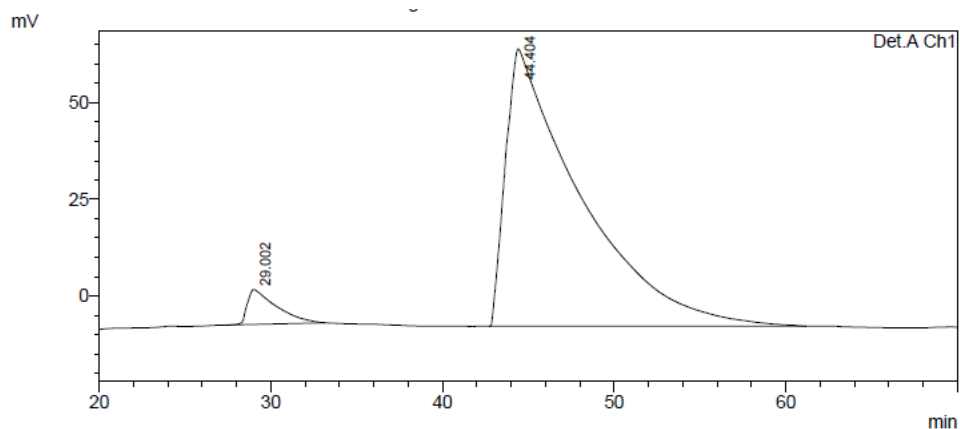

| Peak# | Ret. Time | Area     | Height | Area %  | Height % |
|-------|-----------|----------|--------|---------|----------|
| 1     | 29.002    | 1055449  | 9032   | 4.660   | 11.182   |
| 2     | 44.404    | 21593915 | 71742  | 95.340  | 88.818   |
| Total |           | 22649365 | 80774  | 100.000 | 100.000  |

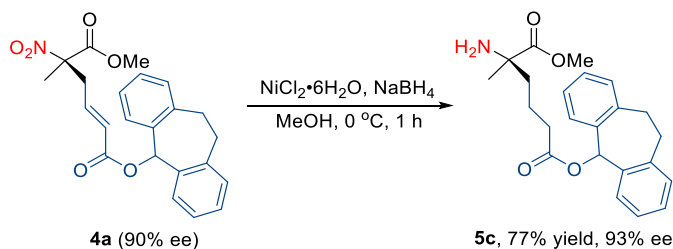

To a solution of **4a** (40.9 mg, 0.1 mmol) in  $\text{MeOH}$  (2.0 mL),  $\text{NiCl}_2 \cdot 6\text{H}_2\text{O}$  (23.8 mg, 0.1 mmol) and  $\text{NaBH}_4$  (19.0 mg, 0.5 mmol) was added at  $0\text{ }^\circ\text{C}$ . The reaction mixture was stirred at  $0\text{ }^\circ\text{C}$  for 90 min. Then,  $\text{NaHCO}_3$  was added dropwise until the solution attained pH 9. Methanol was removed by evaporation, and the aqueous layer was extracted with ethyl acetate. The combined organic layers were washed with brine, dried over  $\text{MgSO}_4$ . After evaporation under reduced pressure, the residue was purified by silica gel flash column chromatography (hexane/ ethyl acetate = 2/1) to give **5c** as colorless oil (29.4 mg, 77% yield).  $[\alpha]_D^{25} = -1.8$  ( $c = 2.0$ ,  $\text{CHCl}_3$ );  $^1\text{H}$  NMR (500 MHz,  $\text{CDCl}_3$ ):  $\delta = 7.40$  (d,  $J = 8.0$  Hz, 2H), 7.25–7.22 (m, 2H), 7.18–7.15 (m, 4H), 6.90 (s, 1H), 3.66 (s, 3H), 3.59–3.52 (m, 2H), 3.05–2.99 (m, 2H), 2.34 (t,  $J = 6.0$  Hz, 2H), 1.66–1.62 (m, 2H), 1.53–1.49 (m, 2H), 1.27 (s, 3H) ppm.  $^{13}\text{C}$  NMR (125 MHz,  $\text{CDCl}_3$ ):  $\delta = 177.58$ , 172.08, 140.20, 136.76, 130.41, 129.84, 128.86, 126.28, 79.10, 57.78, 52.37, 40.17, 34.62, 32.53, 26.12, 19.76 ppm. HRMS (ESI)  $m/z$  calcd for



$C_{23}H_{27}NNaO_4 [M+Na]^+$  404.1832, found 404.1830. The *ee* value was 93%,  $t_R$  (minor) = 21.522 min,  $t_R$  (major) = 23.468 min (Chiralpak IF,  $\lambda = 220$  nm, 10.0% *i*PrOH/hexane, flow rate = 1.0 mL/min).

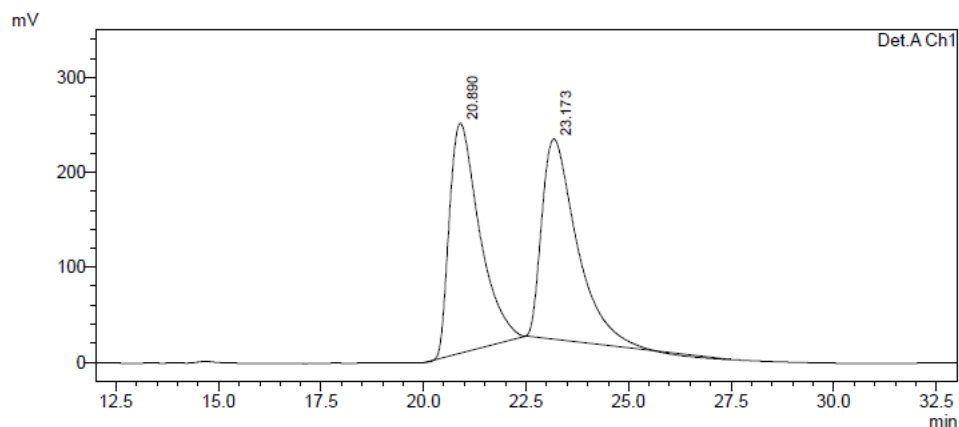

1 Det.A Ch1/220nm

PeakTable

| Peak# | Ret. Time | Area     | Height | Area %  | Height % |
|-------|-----------|----------|--------|---------|----------|
| 1     | 20.890    | 12384024 | 242012 | 49.664  | 53.431   |
| 2     | 23.173    | 12551757 | 210927 | 50.336  | 46.569   |
| Total |           | 24935780 | 452940 | 100.000 | 100.000  |

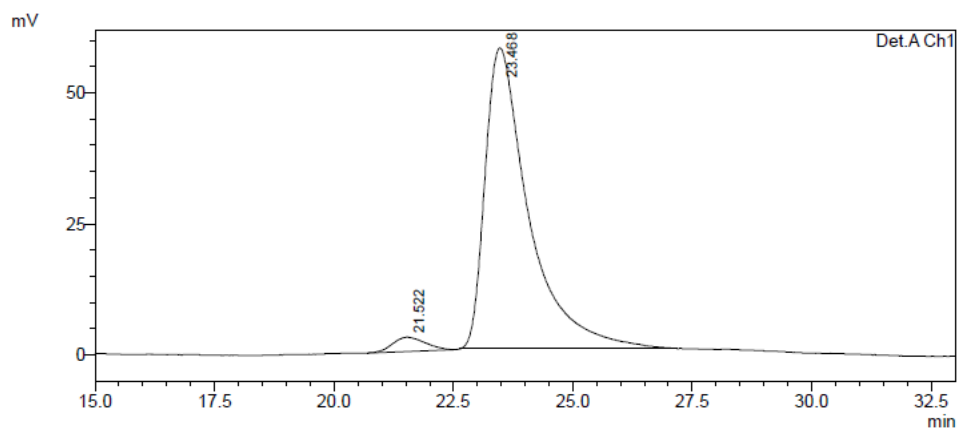

1 Det.A Ch1/220nm

PeakTable

| Peak# | Ret. Time | Area    | Height | Area %  | Height % |
|-------|-----------|---------|--------|---------|----------|
| 1     | 21.522    | 128346  | 2740   | 3.382   | 4.555    |
| 2     | 23.468    | 3667044 | 57428  | 96.618  | 95.445   |
| Total |           | 3795390 | 60169  | 100.000 | 100.000  |

## VI. Determination of the absolute configuration of 5b.

The absolute configuration of products **5b** was established through the comparison of its value of specific rotation with that of a known compound reported in the literature.<sup>3</sup>

| (R)-product in this work                                                                                                                 | (R)-product in literature                                                                                                                 |
|------------------------------------------------------------------------------------------------------------------------------------------|-------------------------------------------------------------------------------------------------------------------------------------------|
| 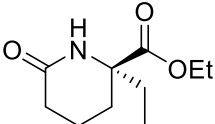 <p>ethyl (R)-2-ethyl-6-oxopiperidine-2-carboxylate</p> |  <p>ethyl (R)-2-ethyl-6-oxopiperidine-2-carboxylate</p> |
| <p>Specific rotation:<br/> <math>[\alpha]_D^{20} = -2.5</math> (c = 1.9, CHCl<sub>3</sub>)</p>                                           | <p>Reported specific rotation:<br/> <math>[\alpha]_D^{20} = -8.3</math> (c = 1.9, CHCl<sub>3</sub>)</p>                                   |

## VII. References

- 1 (a) X. Han, Y. Wang, F. Zhong and Y. Lu, Enantioselective [3 + 2] Cycloaddition of Allenes to Acrylates Catalyzed by Dipeptide-Derived Phosphines: Facile Creation of Functionalized Cyclopentenes Containing Quaternary Stereogenic Centers, *J. Am. Chem. Soc.*, 2011, **133**, 1726–1728; (b) F. Zhong, X. Han, Y. Wang and Y. Lu, Highly Enantioselective [3 + 2] Annulation of Morita–Baylis–Hillman Adducts Mediated by *L*-Threonine-Derived Phosphines: Synthesis of 3-Spirocyclopentene-2-oxindoles having Two Contiguous Quaternary Centers, *Angew. Chem., Int. Ed.*, 2011, **50**, 7837–7841; (c) F. Zhong, X. Han, Y. Wang and Y. Lu, Highly enantioselective [4 + 2] annulations catalyzed by amino acid-based phosphines: Synthesis of functionalized cyclohexenes and 3-spirocyclohexene-2-oxindoles, *Chem. Sci.*, 2012, **3**, 1231–1234; (d) X. Han, F. Zhong, Y. Wang and Y. Lu, Versatile Enantioselective [3 + 2] Cyclization between Imines and Allenates Catalyzed by Dipeptide-Based Phosphines, *Angew. Chem., Int. Ed.*, 2012, **51**, 767–770; (e) F. Zhong, J. Luo, G.-Y. Chen, X. Dou and Y. Lu, Highly Enantioselective Regiodivergent Allylic Alkylations of MBH Carbonates with Phthalides, *J. Am. Chem. Soc.*, 2012, **134**, 10222–10227; (f) F. Zhong, X. Dou, X. Han, W. Yao, Q. Zhu, Y. Meng and Y. Lu, Chiral Phosphine Catalyzed Asymmetric Michael Addition of Oxindoles, *Angew. Chem., Int. Ed.*, 2013, **52**, 943–947; (g) X. Han, W. Yao, T. Wang, Y. R. Tan, Z. Yan, J. Kwiatkowski and Y. Lu, Asymmetric Synthesis of Spiropyrazolones through Phosphine-Catalyzed [4 + 1] Annulation, *Angew. Chem., Int. Ed.*, 2014, **53**, 5643–5647; (h) W. Yao, X. Dou and Y. Lu, Highly Enantioselective Synthesis of 3,4-Dihydropyrans through a Phosphine-Catalyzed [4 + 2] Annulation of Allenones and  $\beta,\gamma$ -Unsaturated  $\alpha$ -Keto Esters, *J. Am. Chem. Soc.*, 2015, **137**, 54–57; (i) T. Wang, Z. Yu, D. L. Hoon, C. Y. Phee, Y. Lan and Y. Lu, Regiodivergent

- Enantioselective  $\gamma$ -Additions of Oxazolones to 2,3-Butadienoates Catalyzed by Phosphines: Synthesis of  $\alpha,\alpha$ -Disubstituted  $\alpha$ -Amino Acids and *N,O*-Acetal Derivatives, *J. Am. Chem. Soc.*, 2016, **138**, 265–271.
- 2 D. F. González, J. P. Brand and J. Waser, Ethynyl-1,2-benziodoxol-3(1*H*)-one (EBX): An Exceptional Reagent for the Ethynylation of Keto, Cyano, and Nitro Esters, *Chem. –Eur. J.*, 2010, **16**, 9457–9461.
- 3 B. Westermann and I. Gedrath, Facile Synthesis of Completely Protected Enantiomerically Pure  $\alpha,\alpha$ -Disubstituted  $\alpha$ -Amino Acids, *Synlett*, 1996, 665–666.

### VIII. Copies of $^1\text{H}$ and $^{13}\text{C}$ NMR spectra

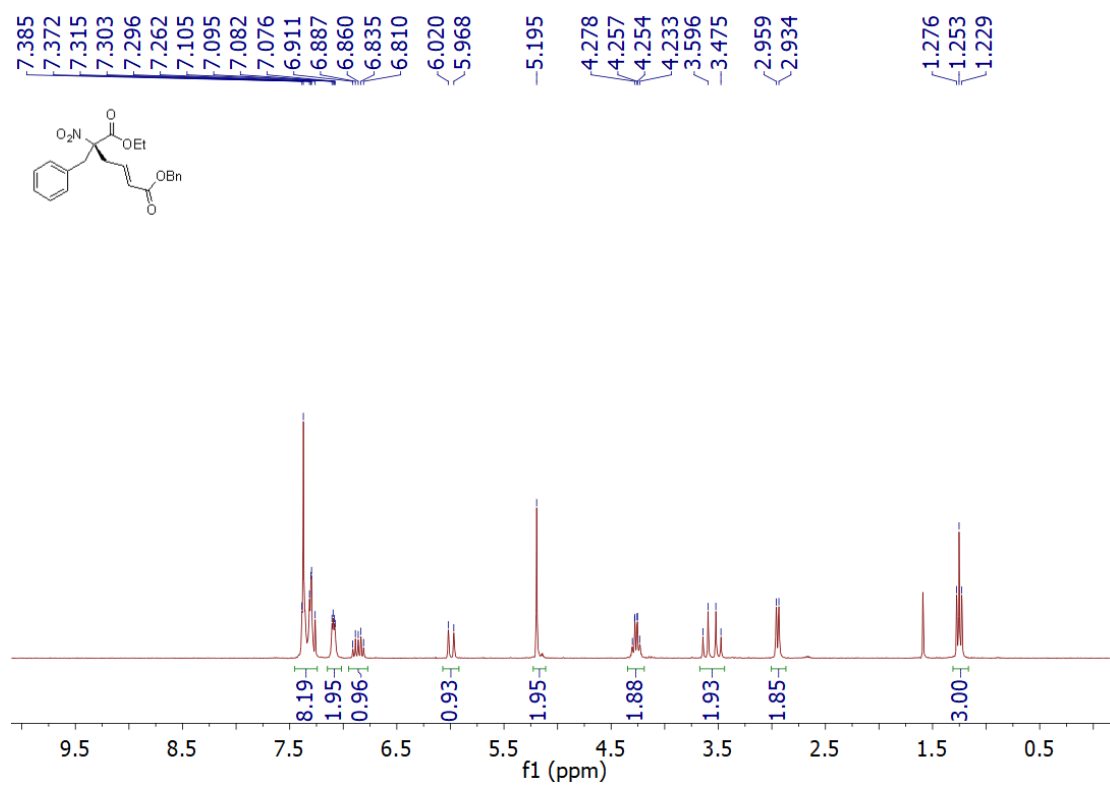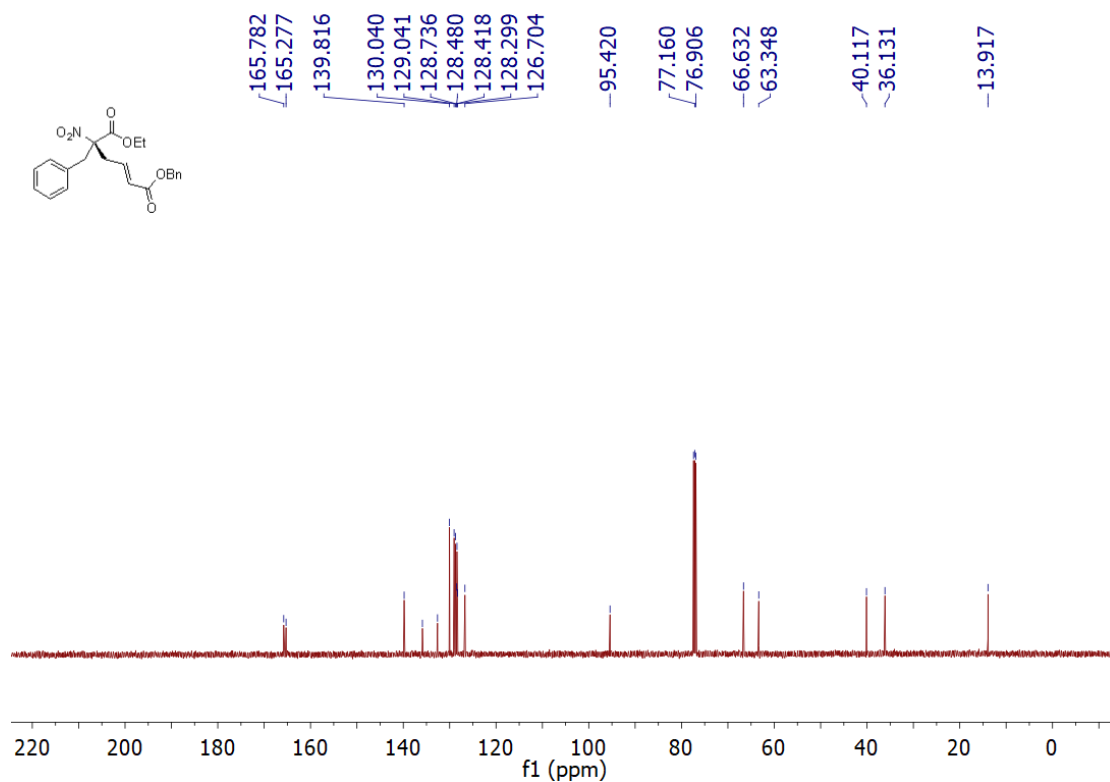

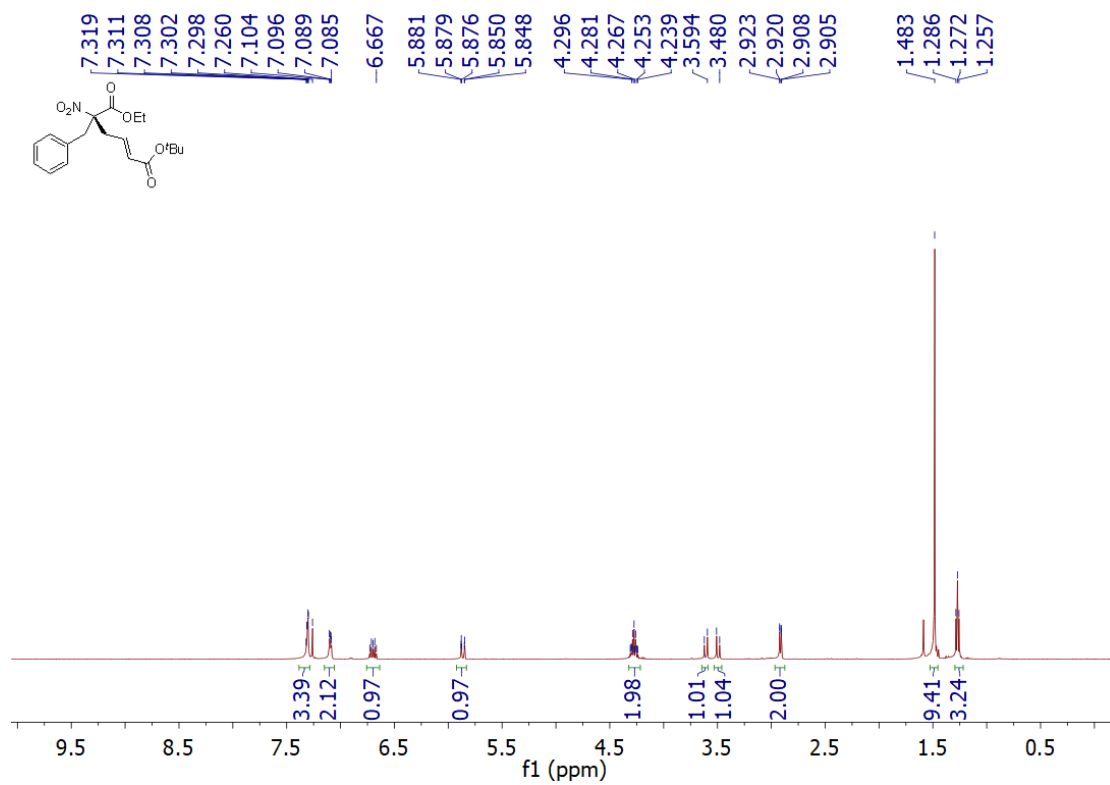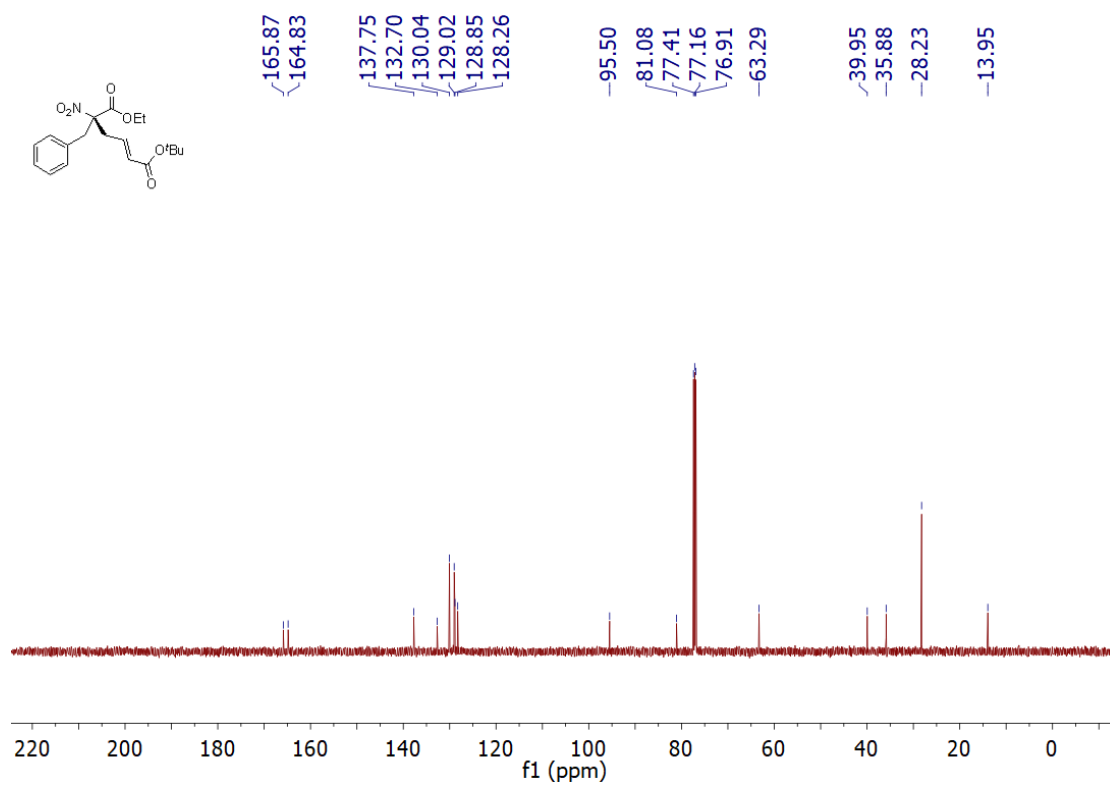

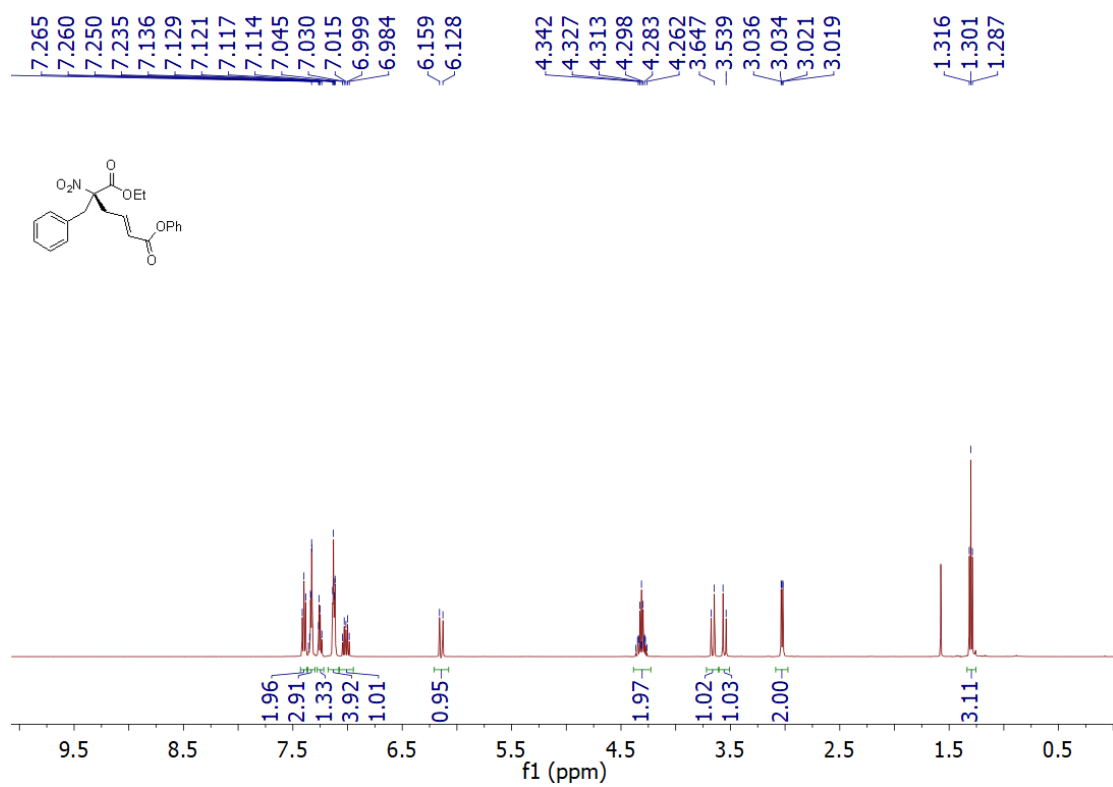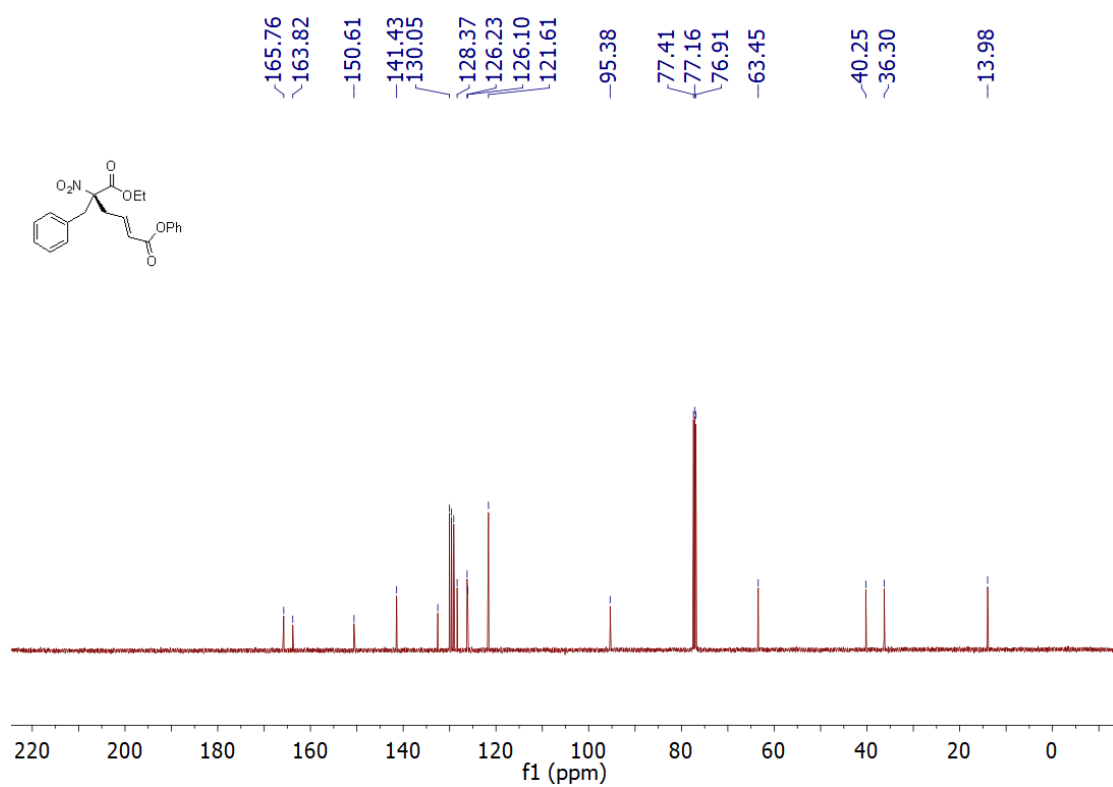

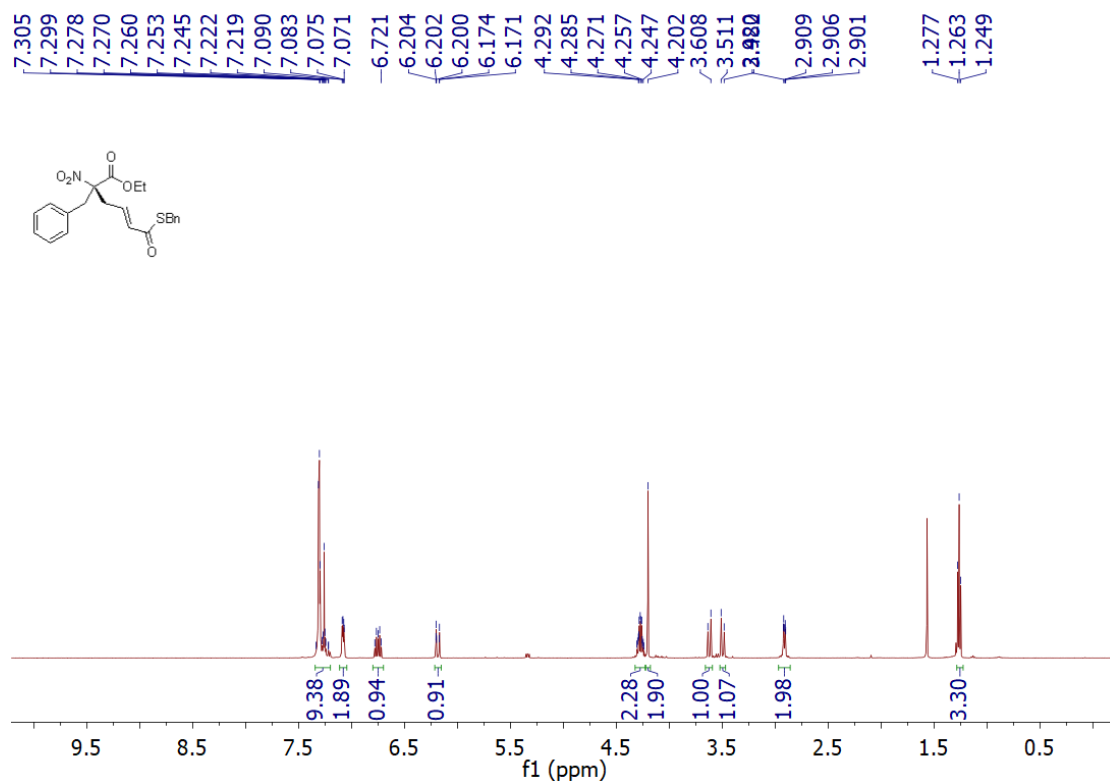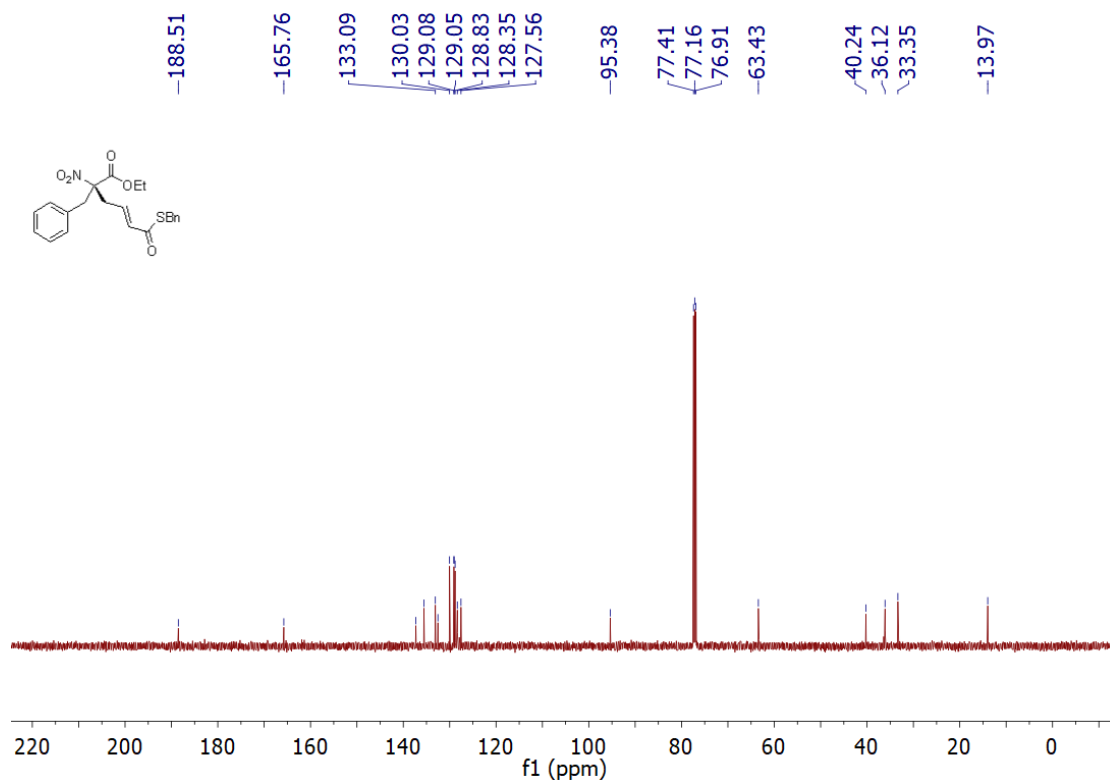

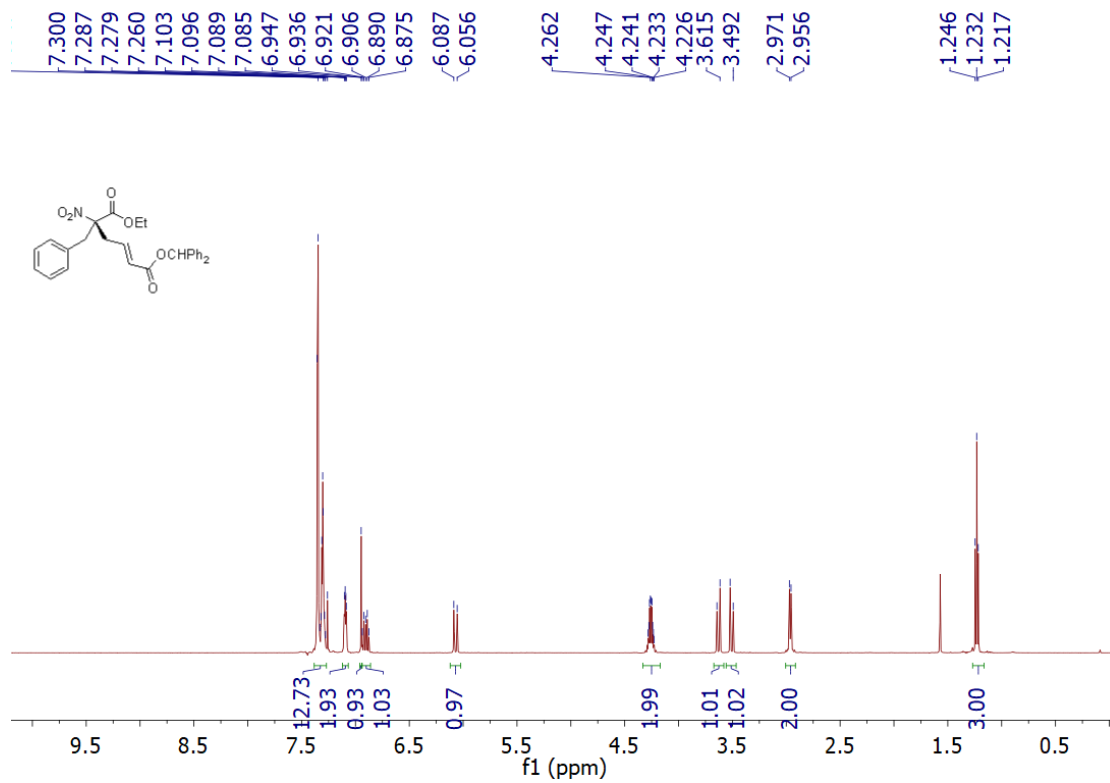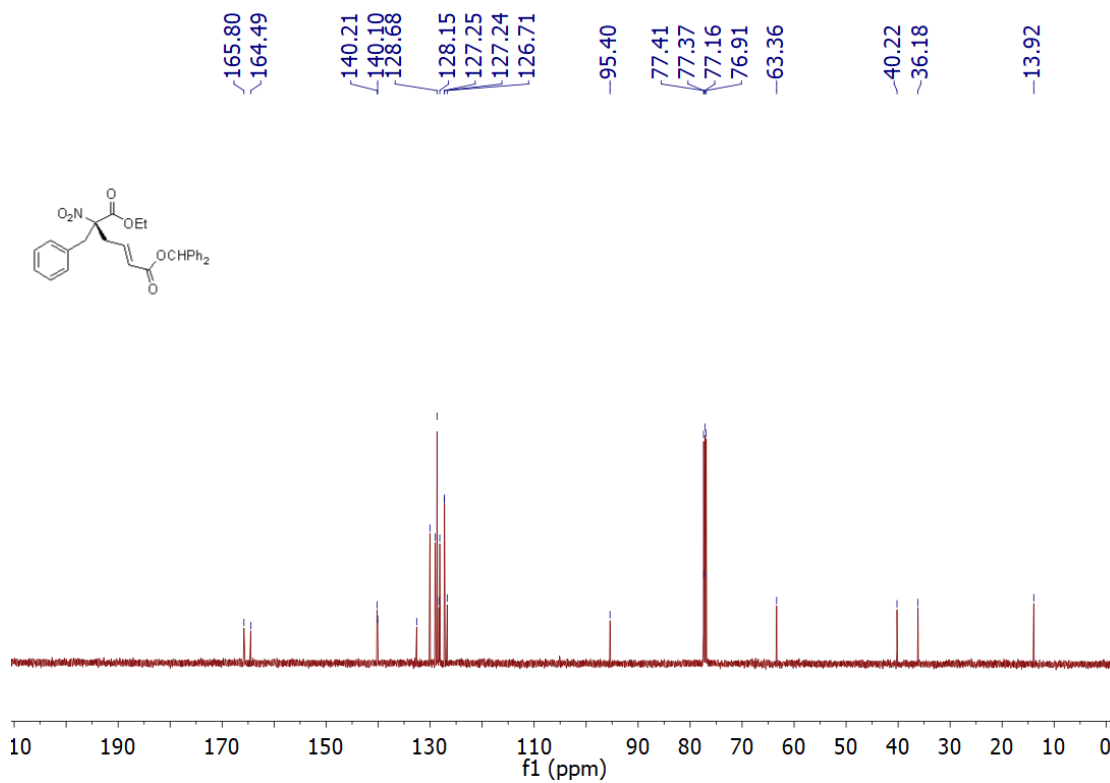



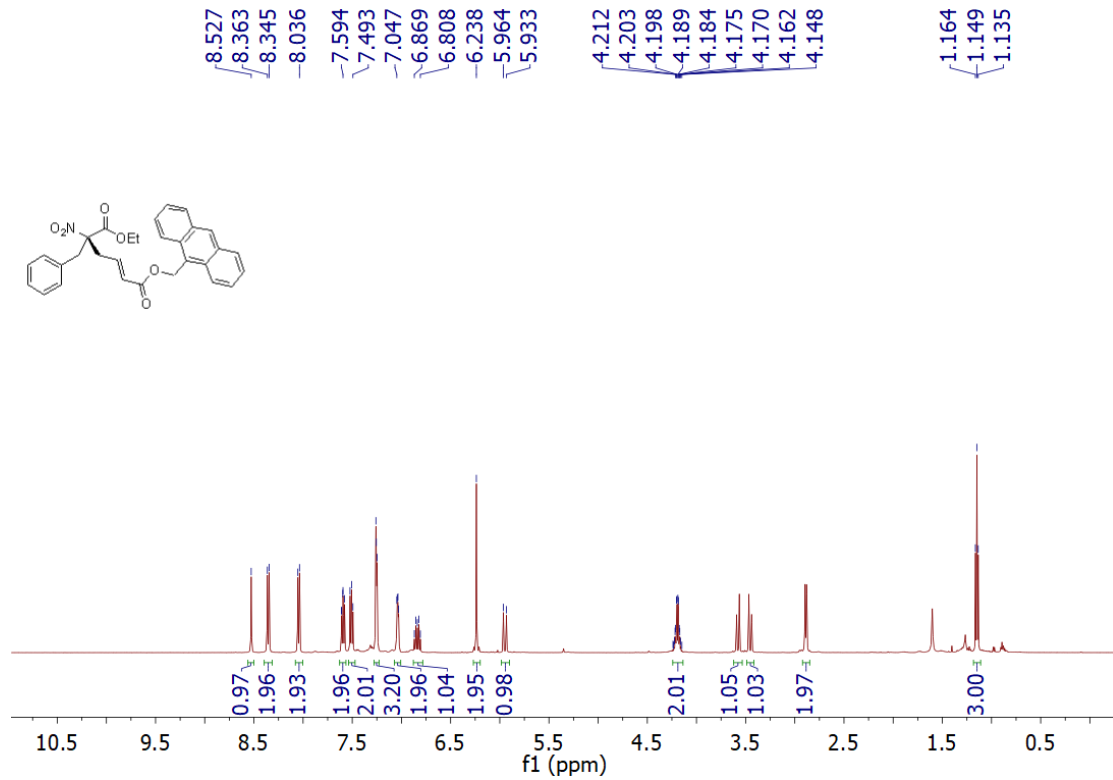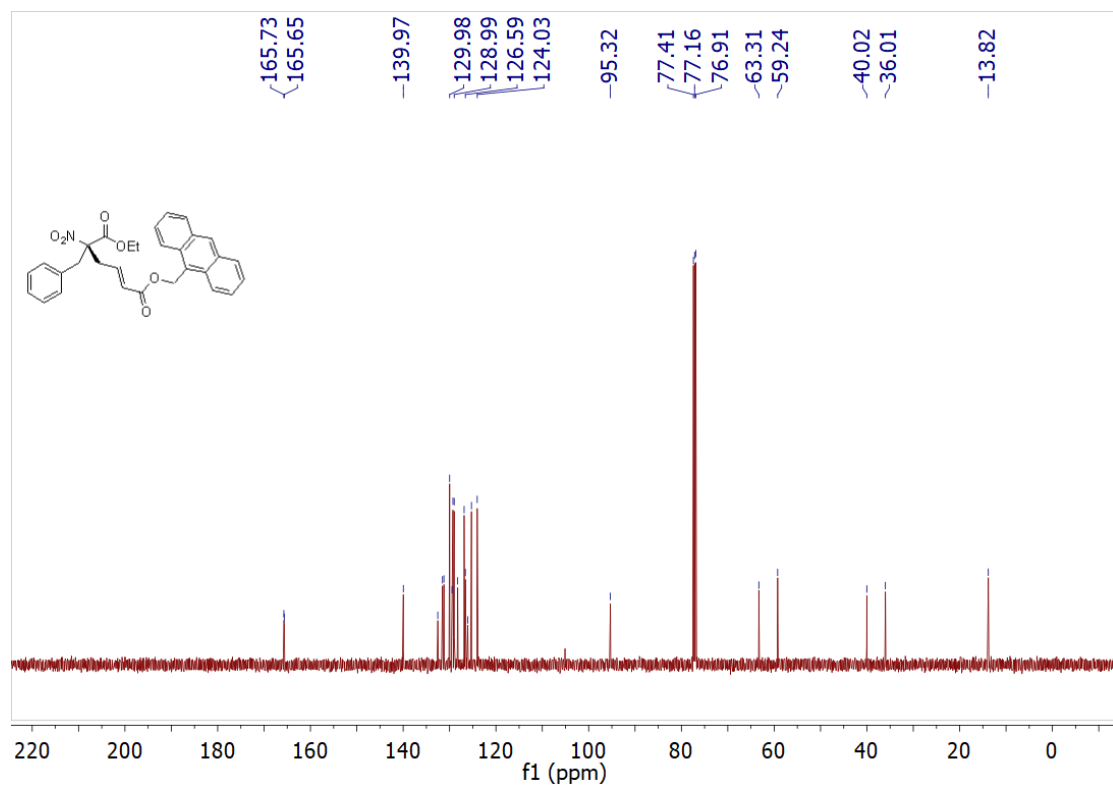

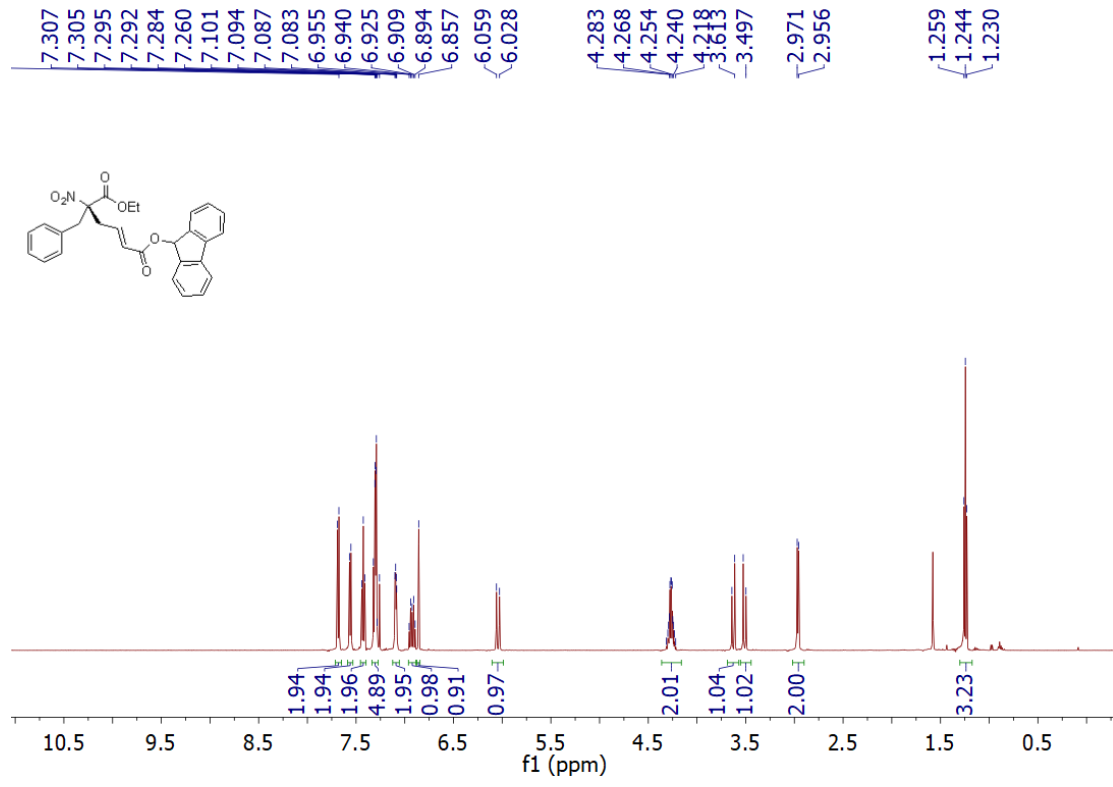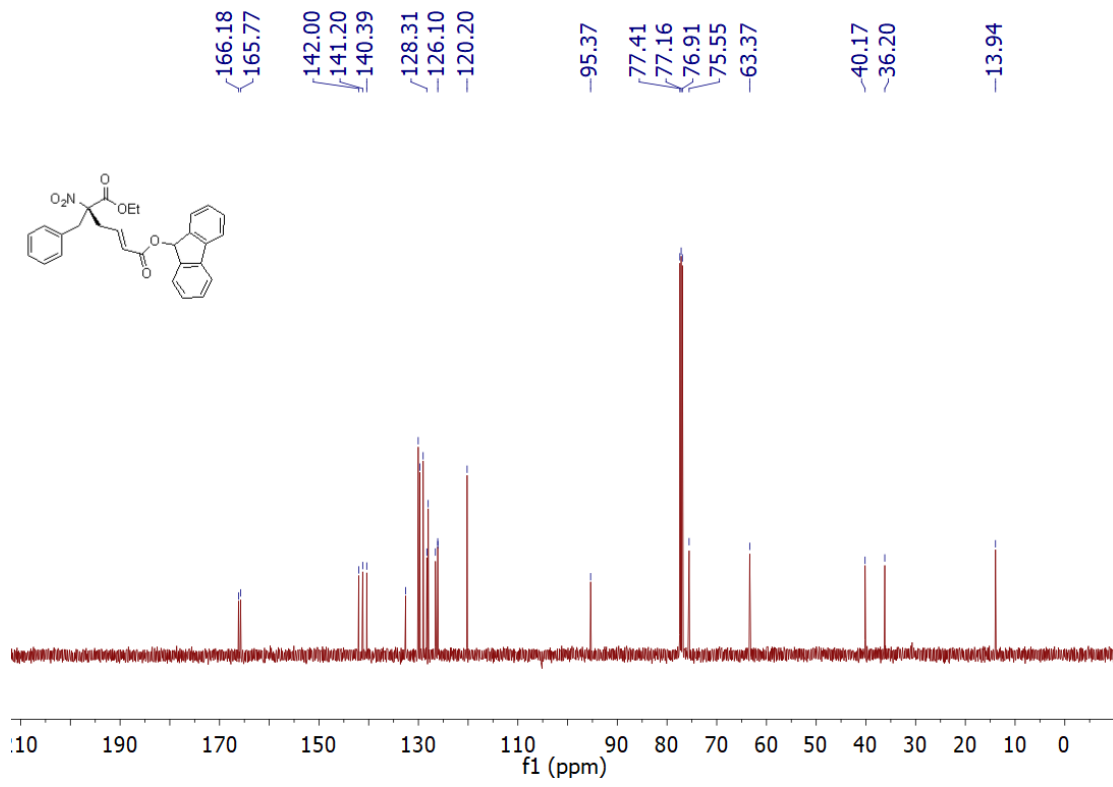

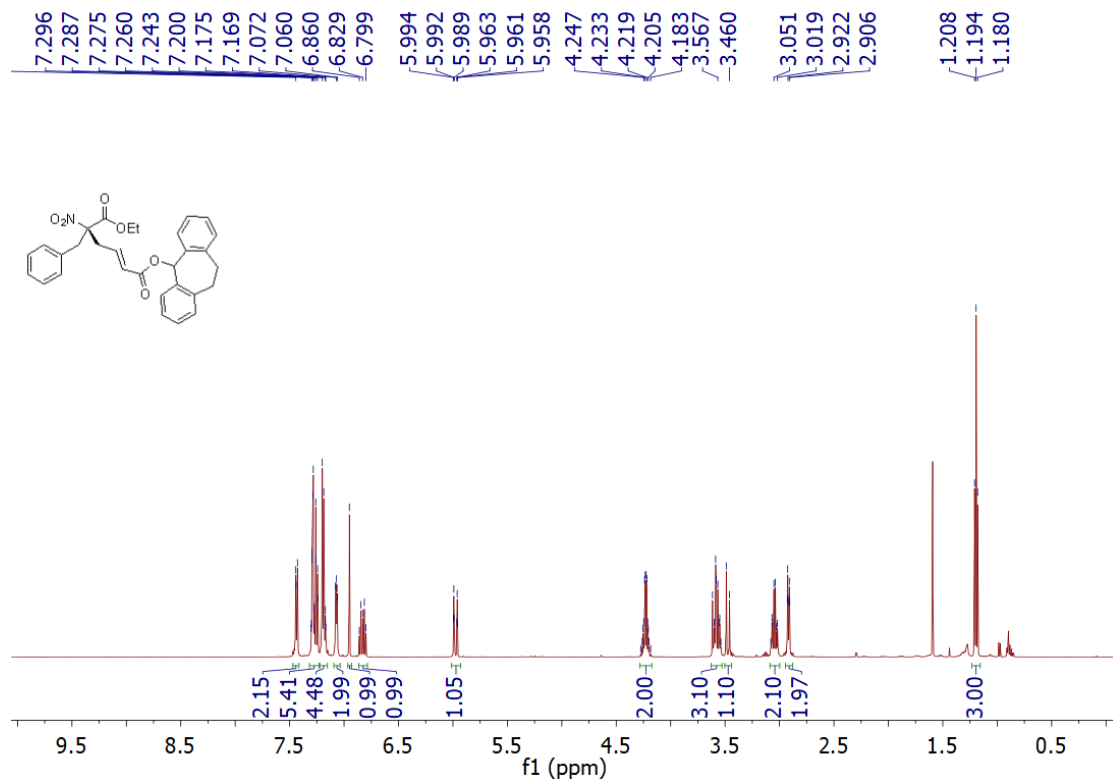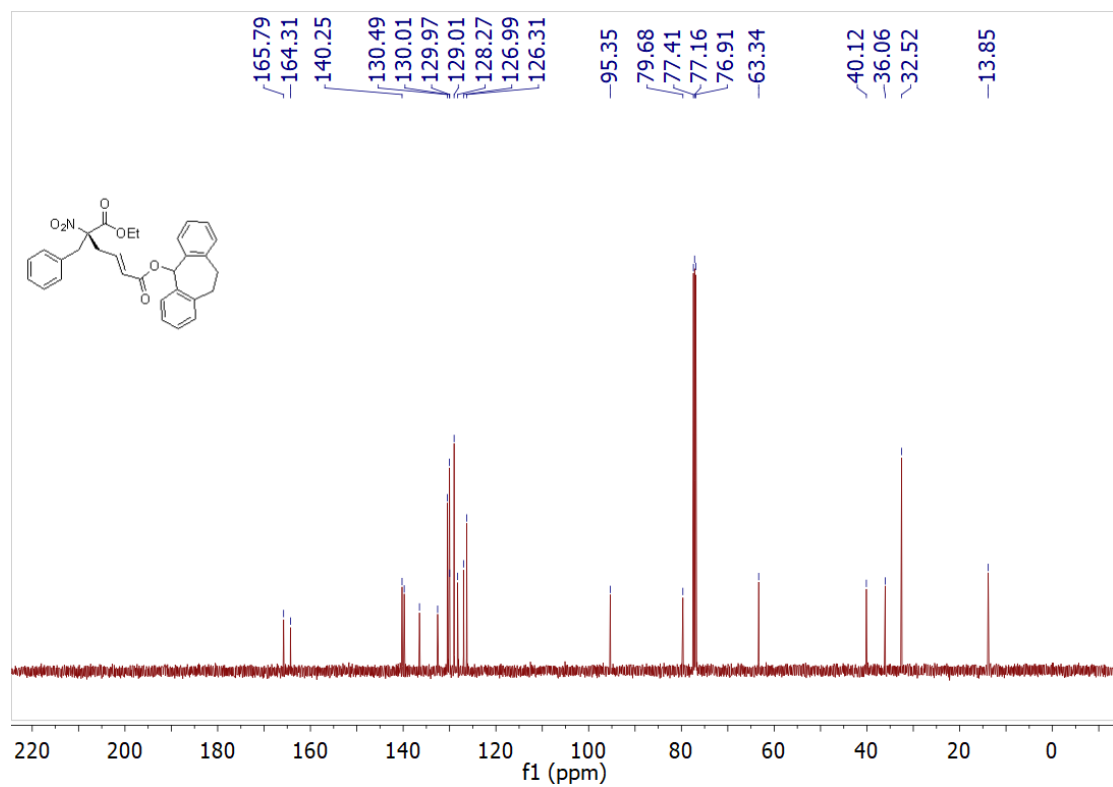

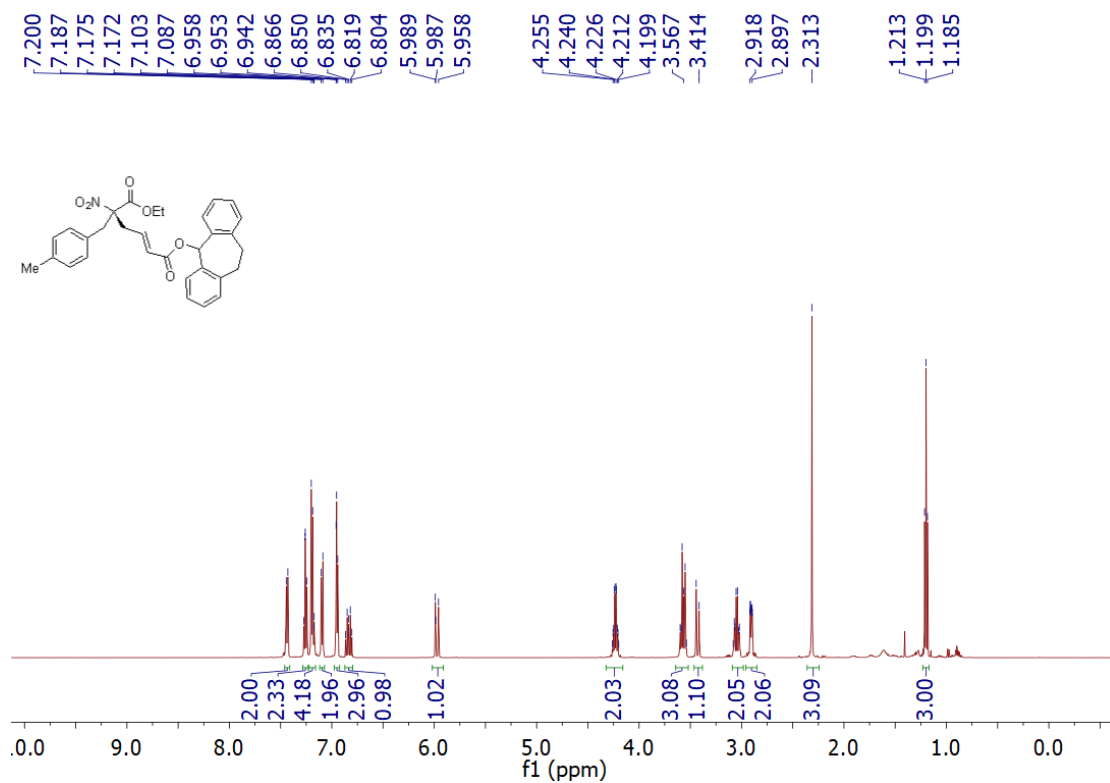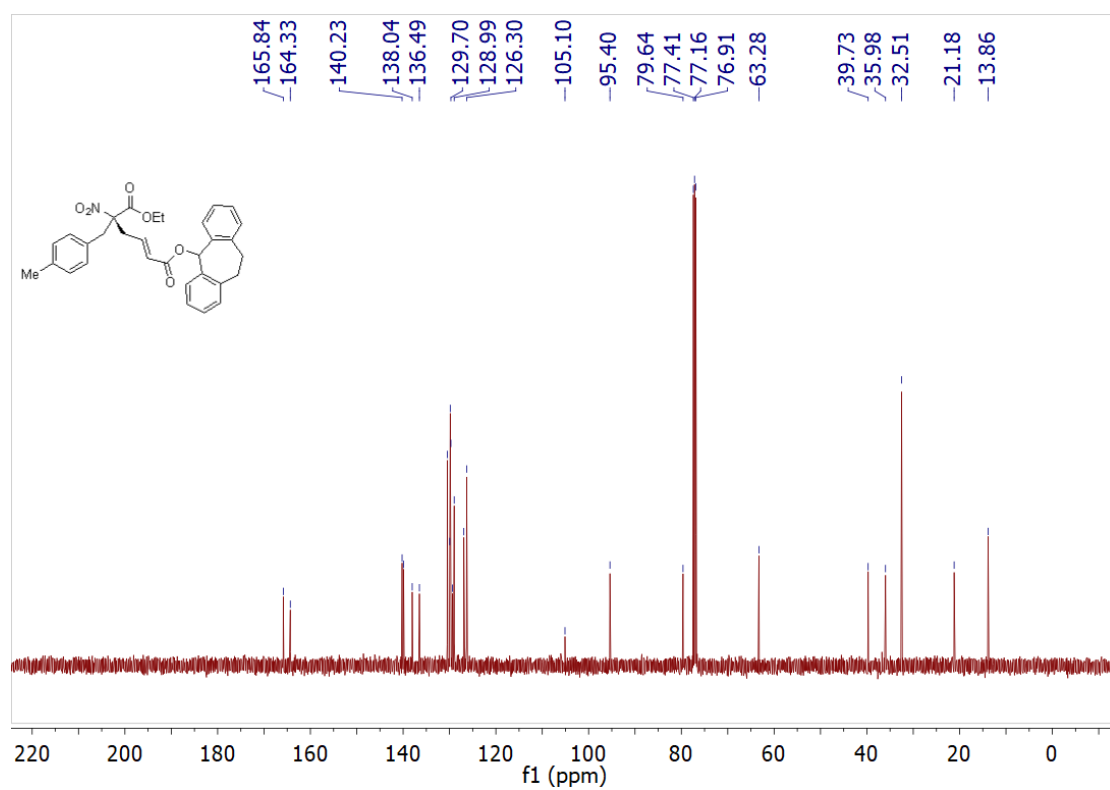

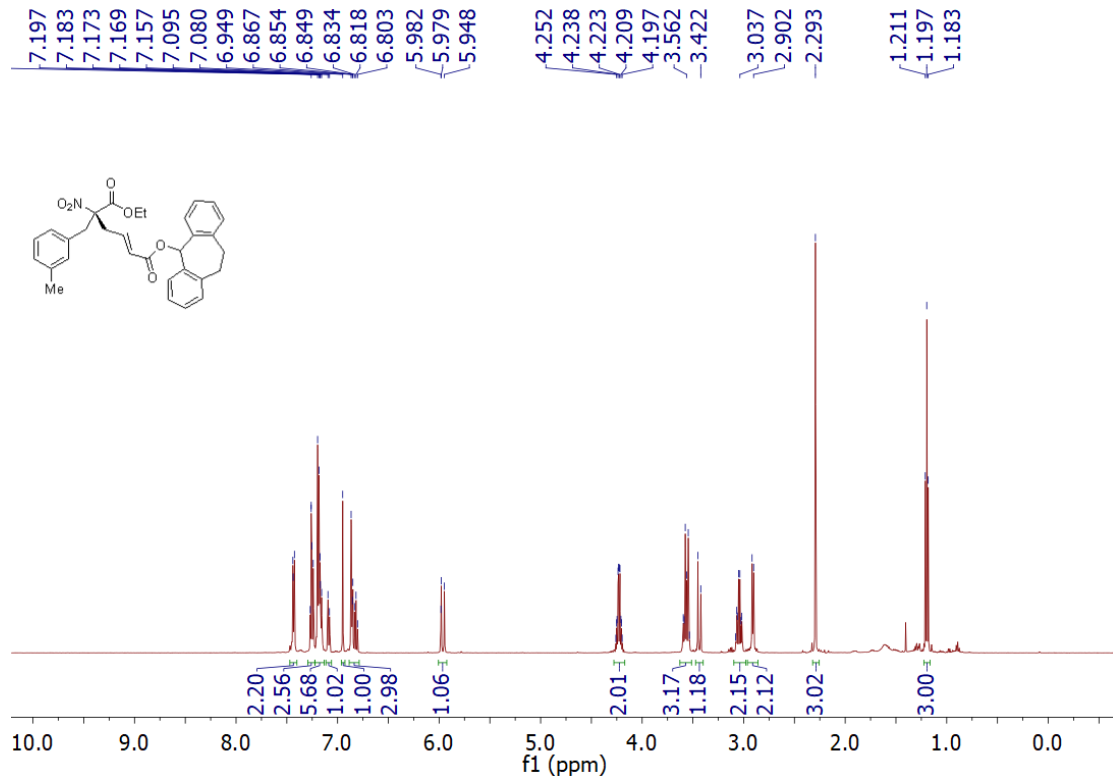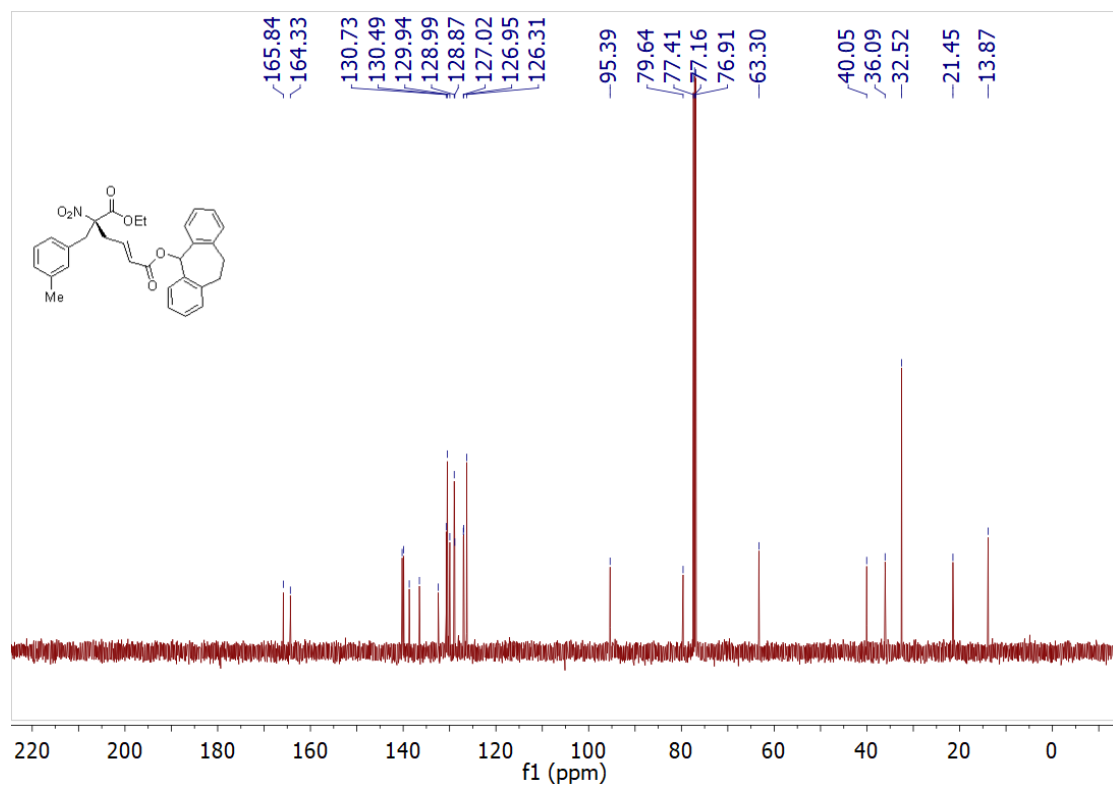

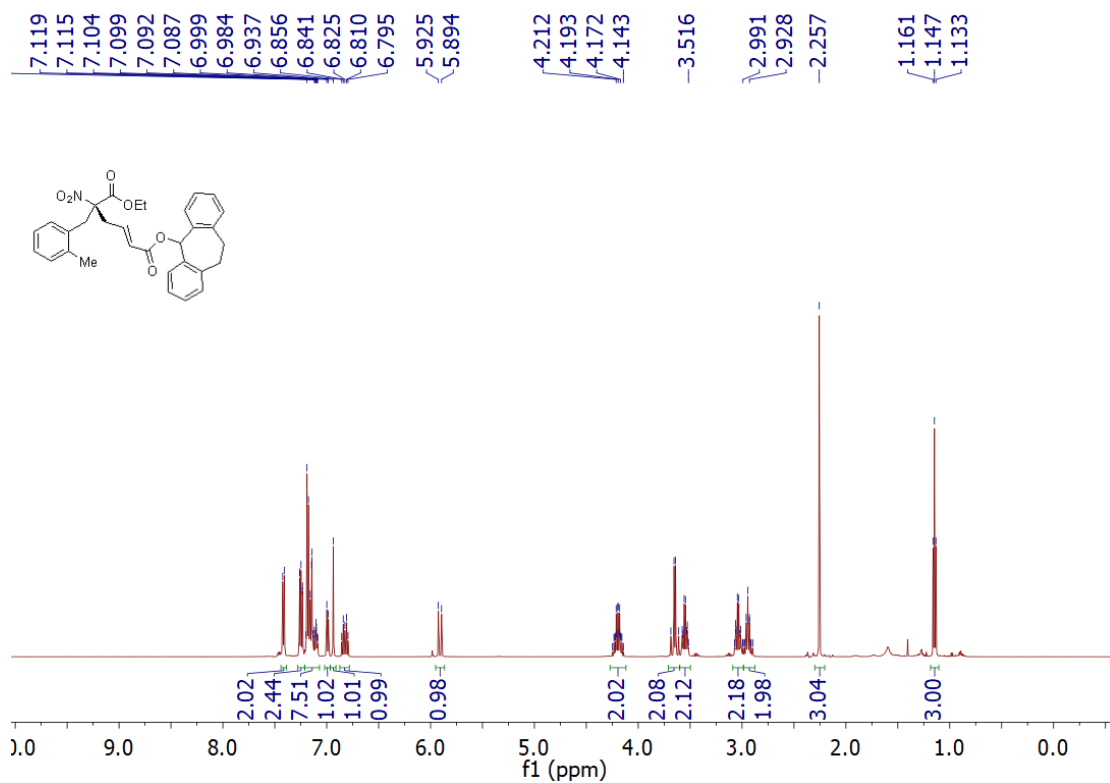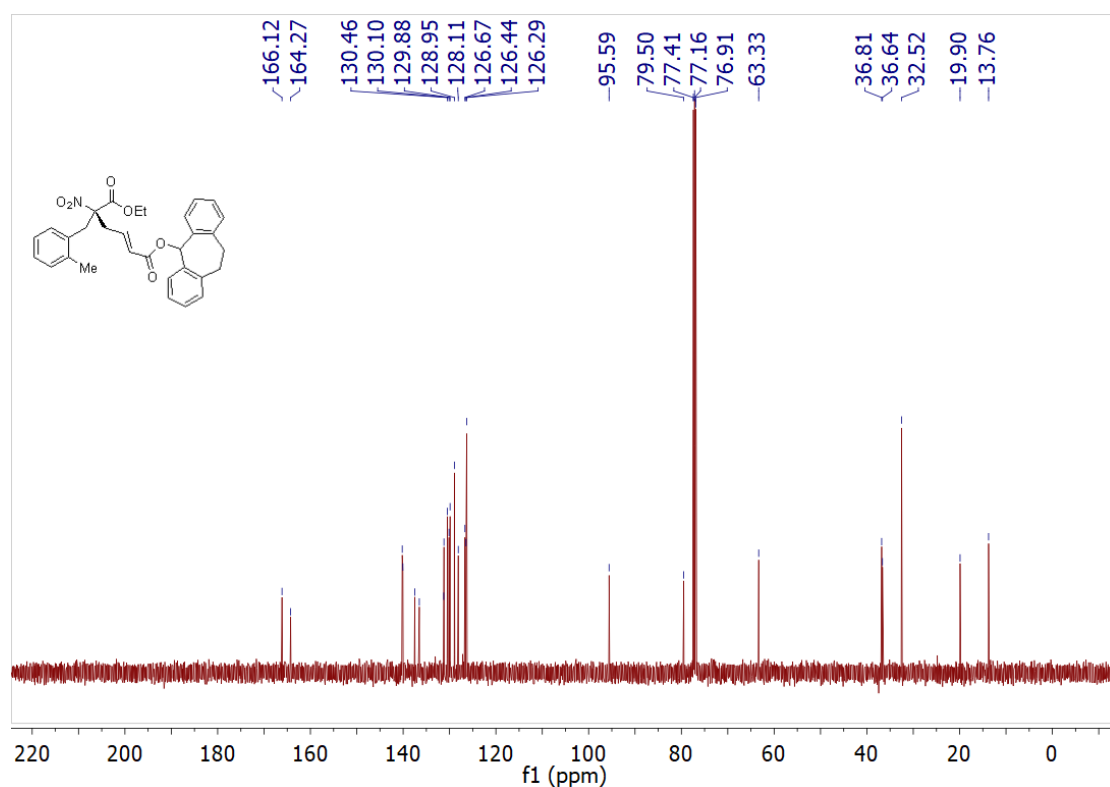

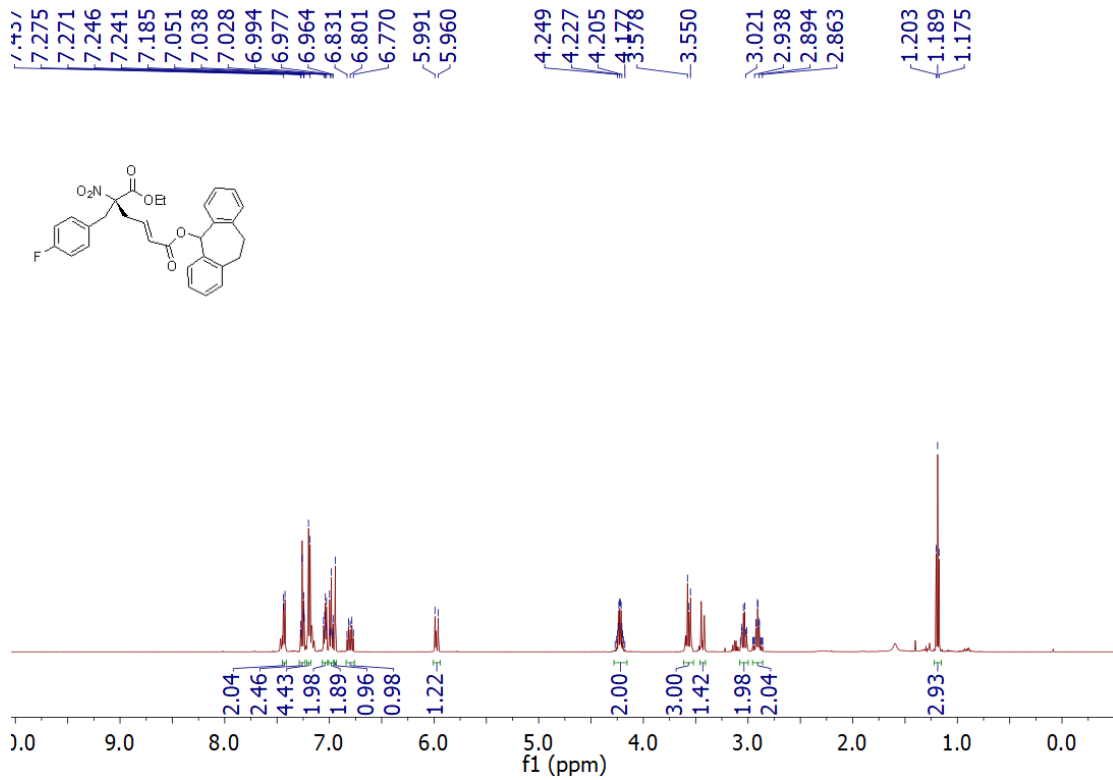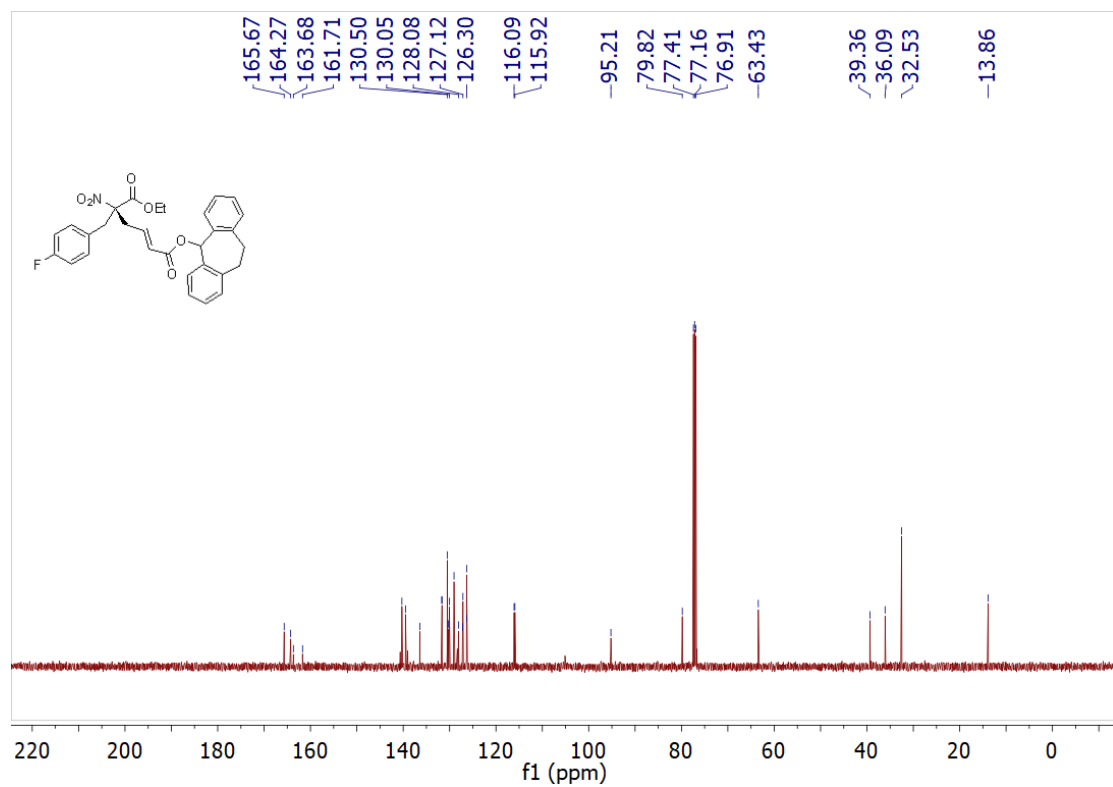

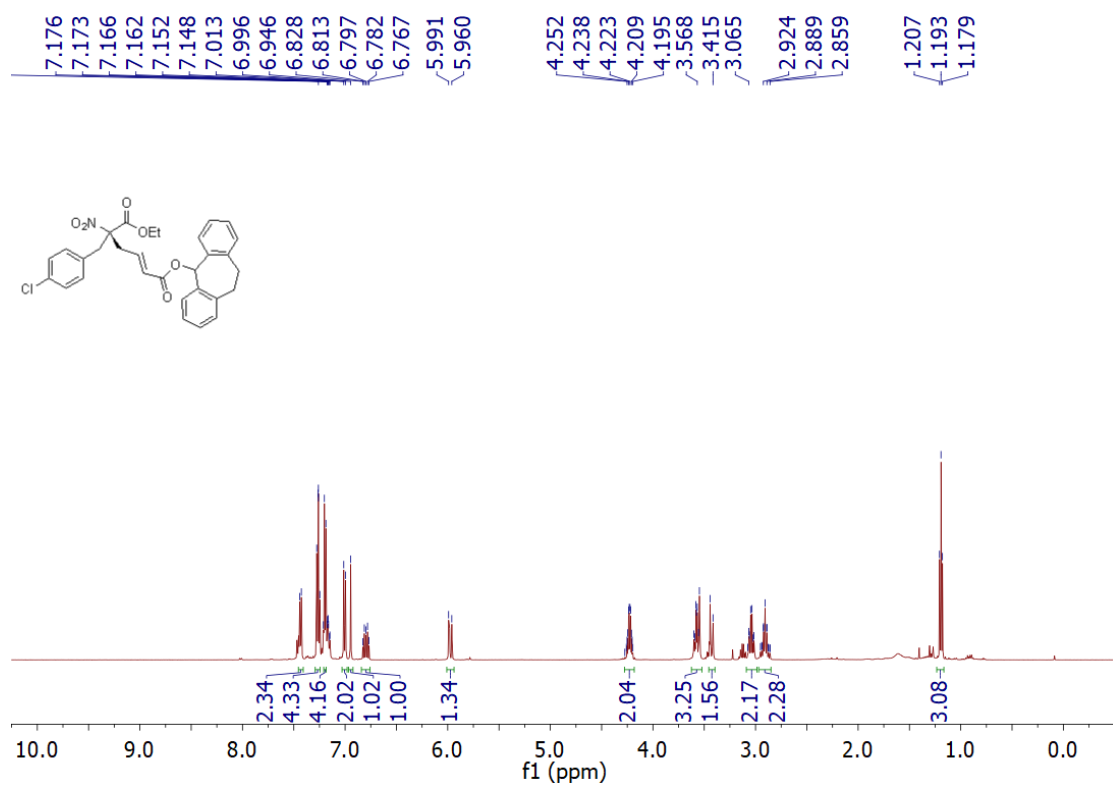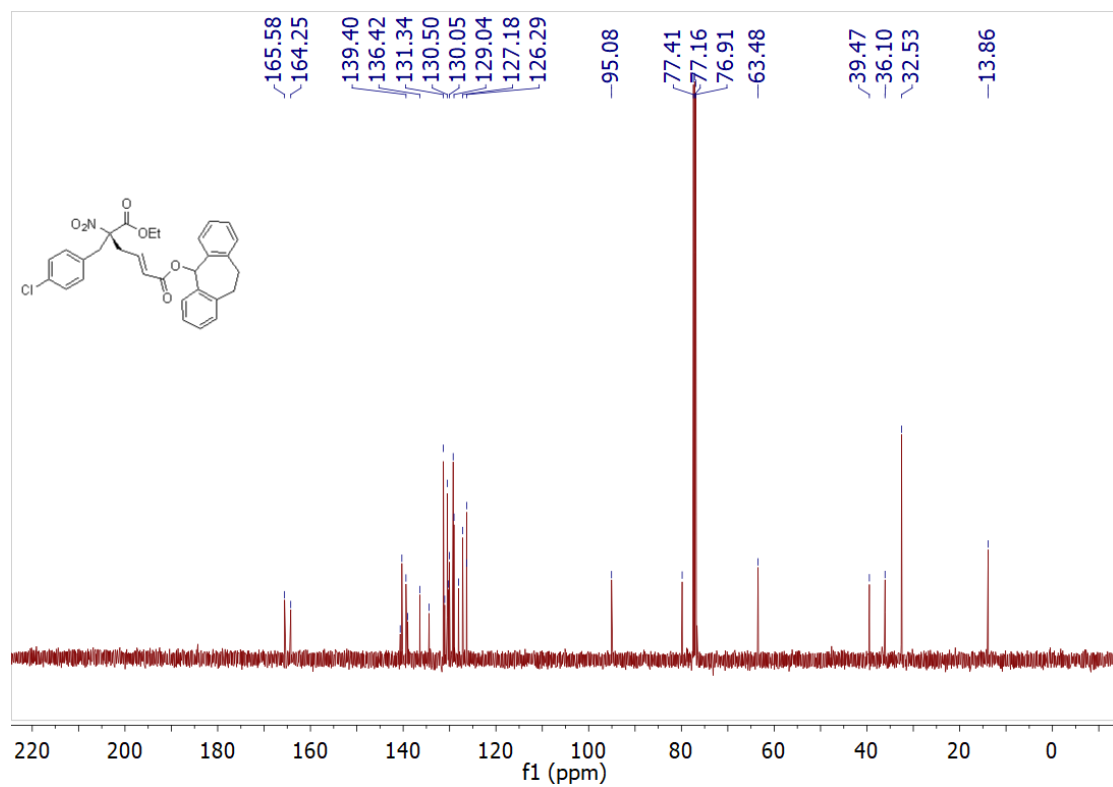



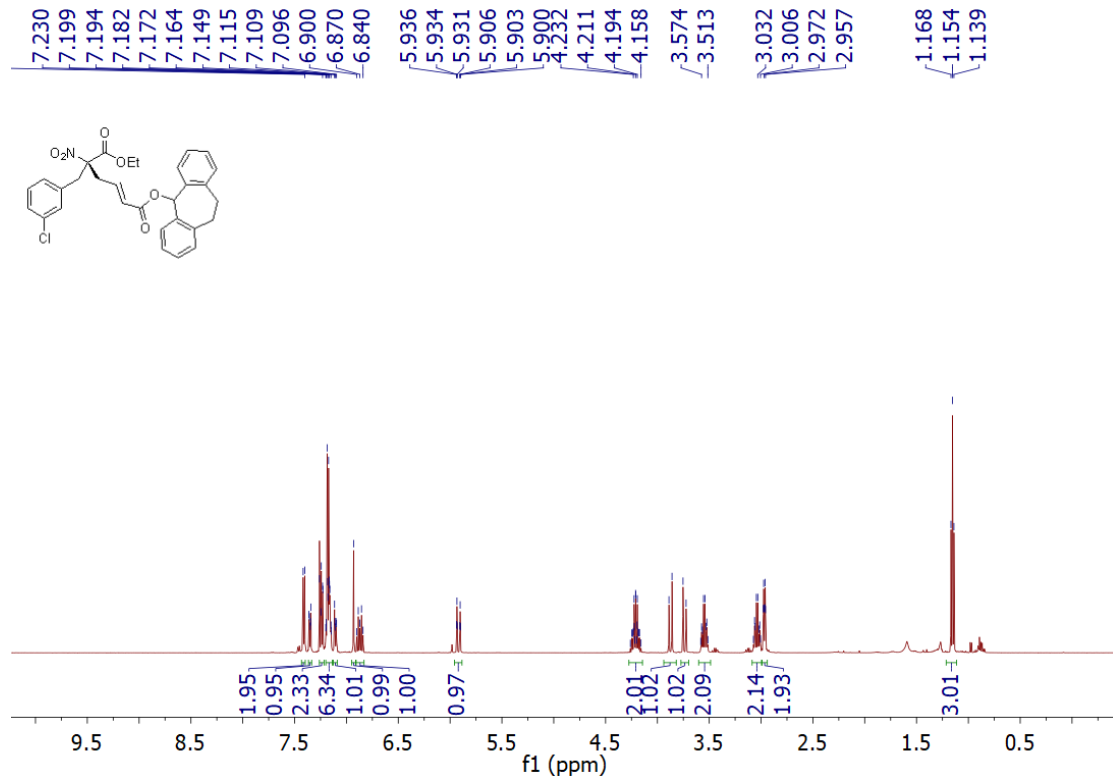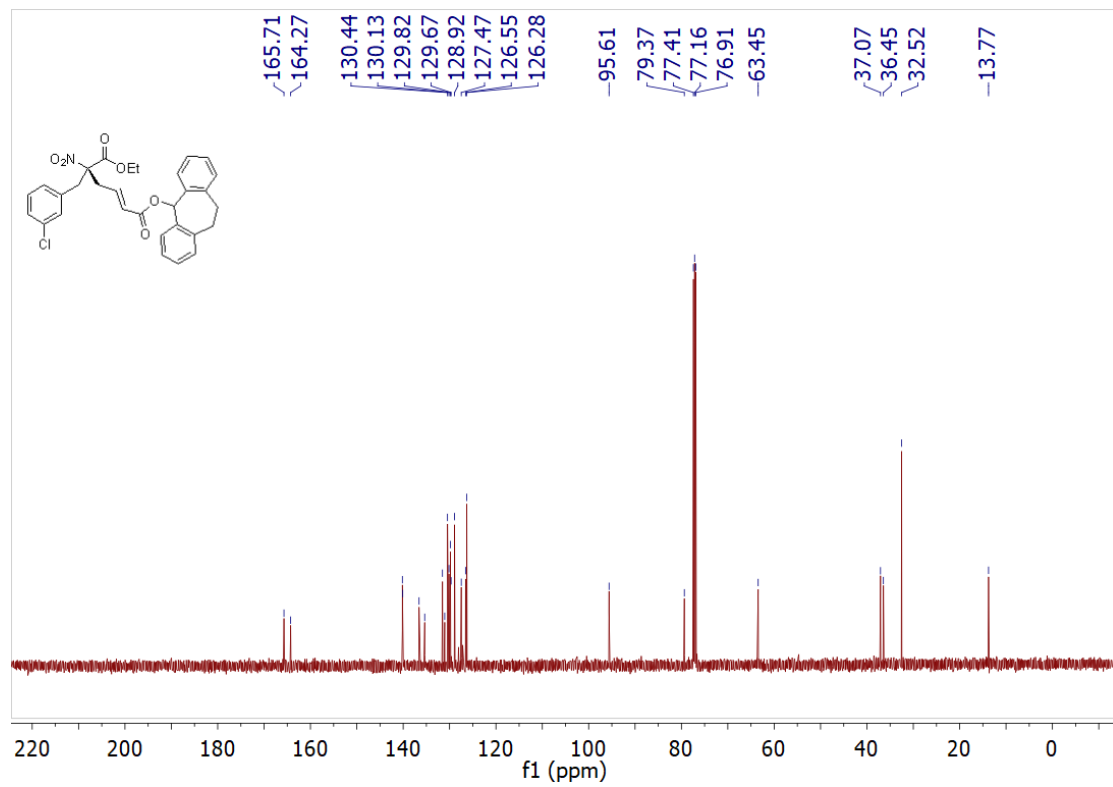

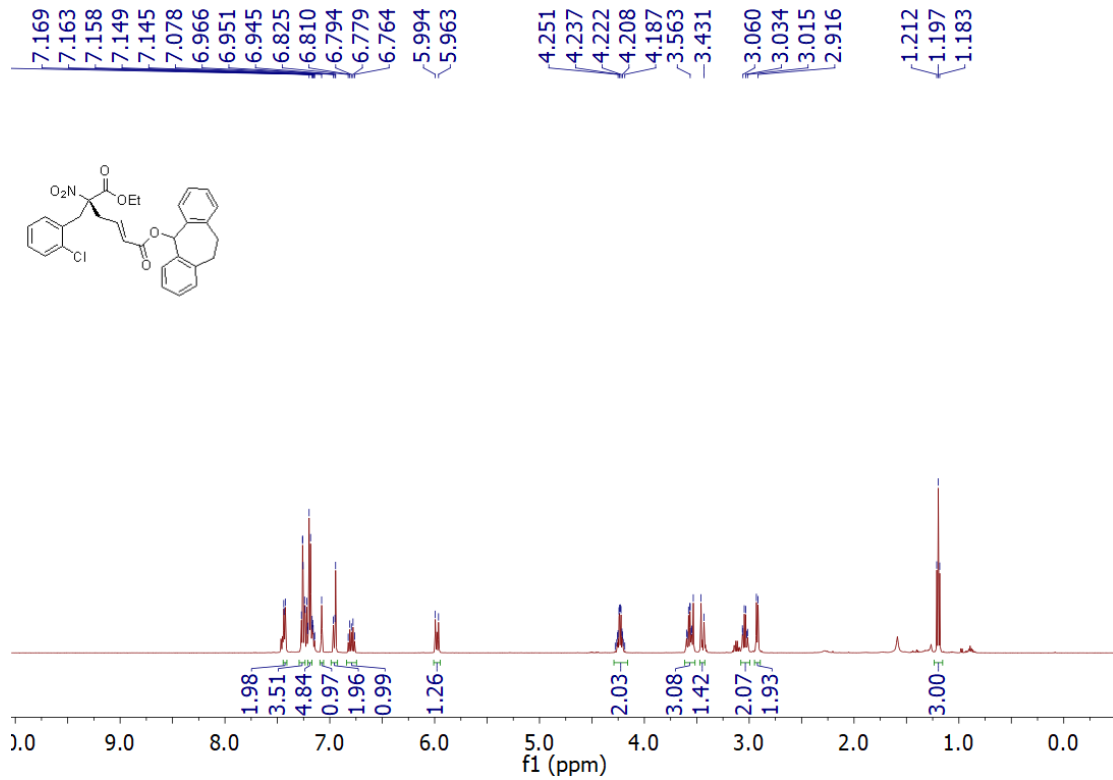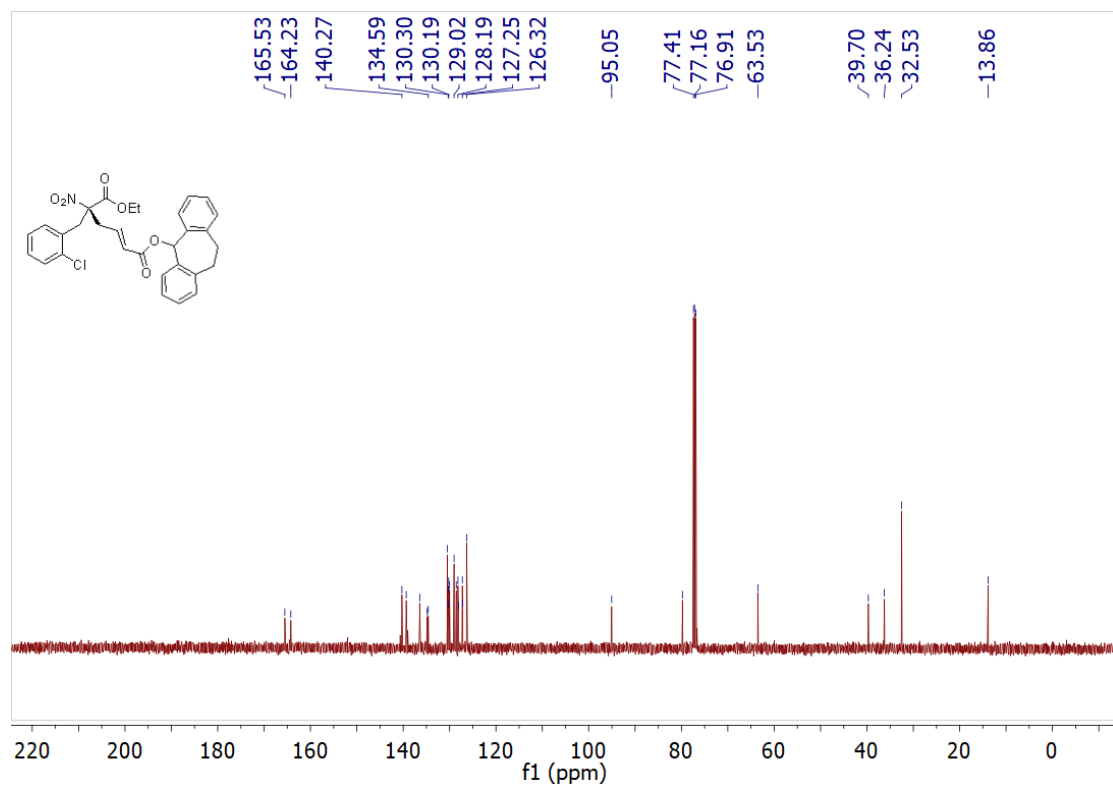

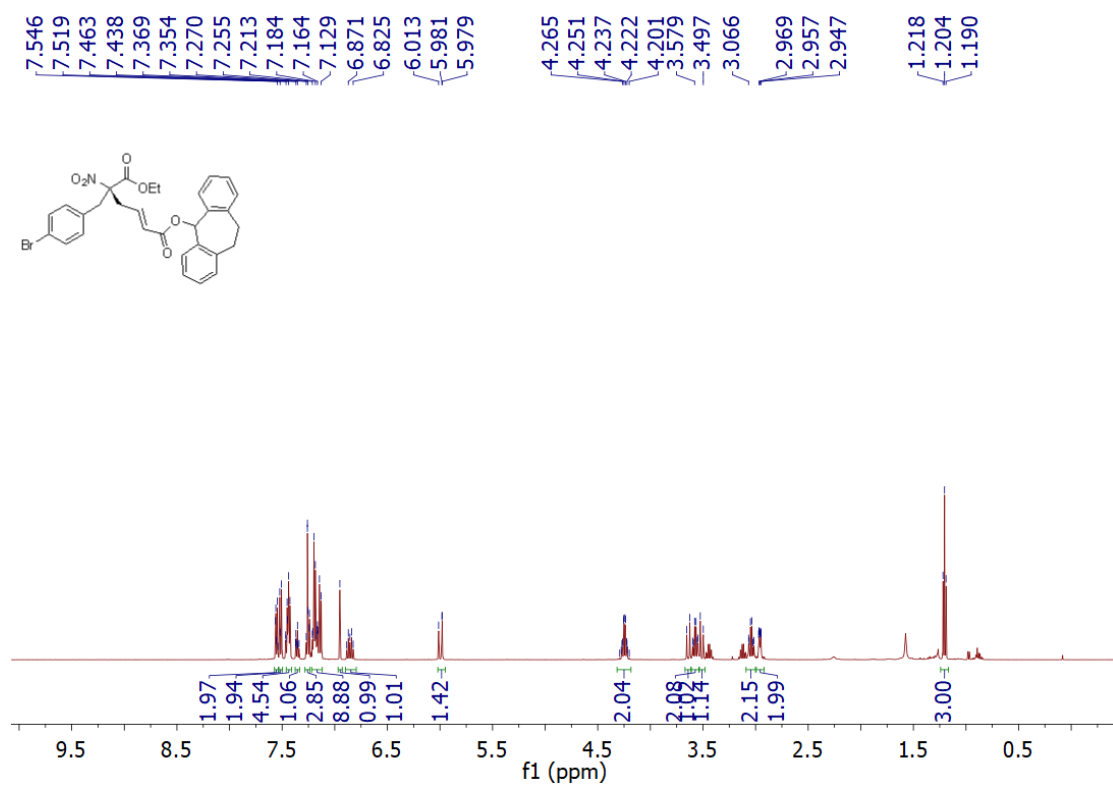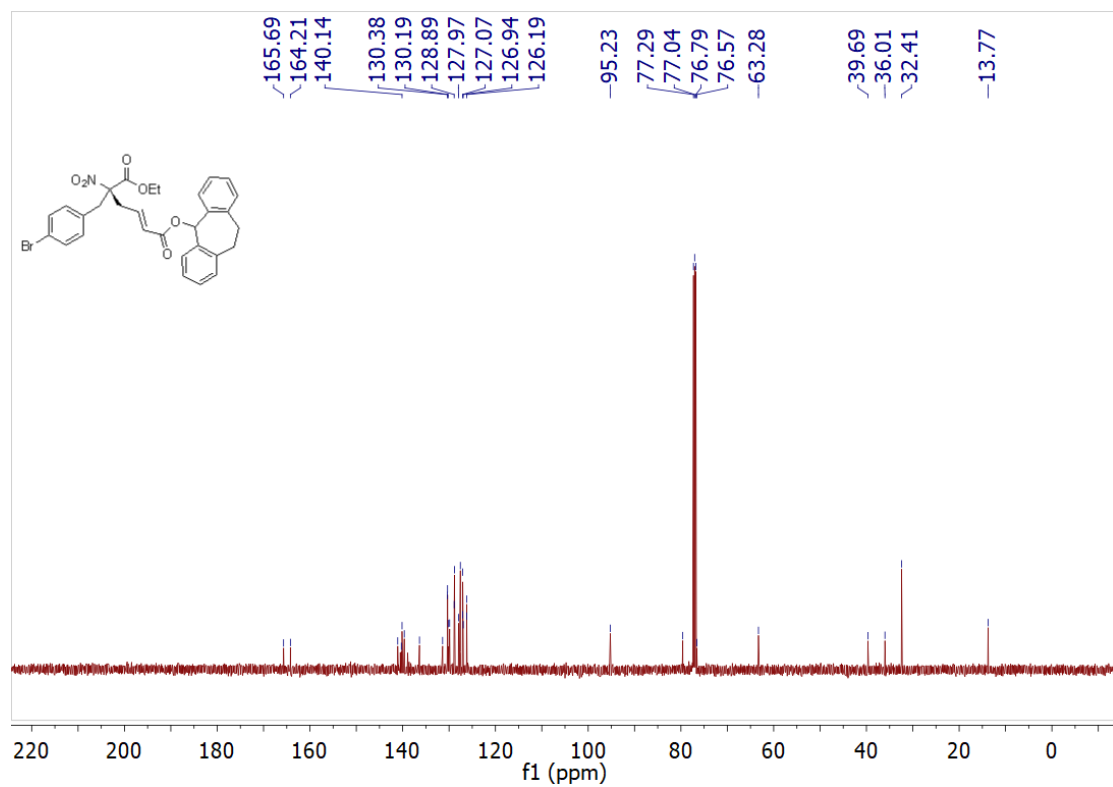

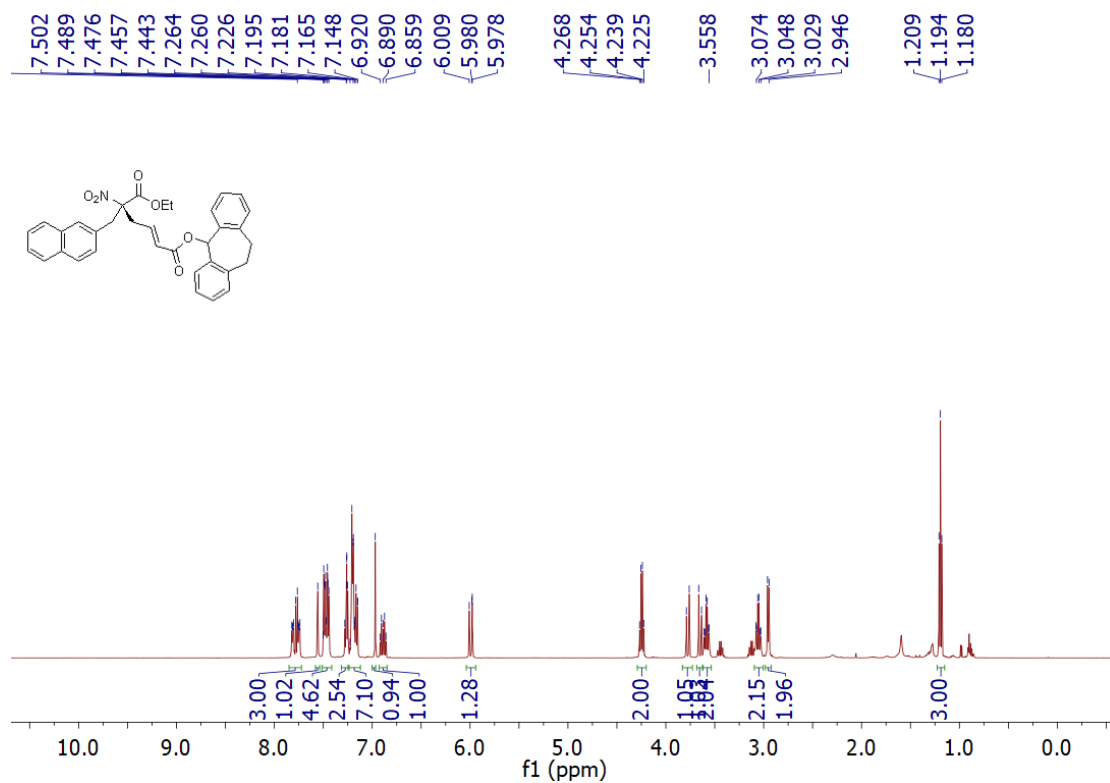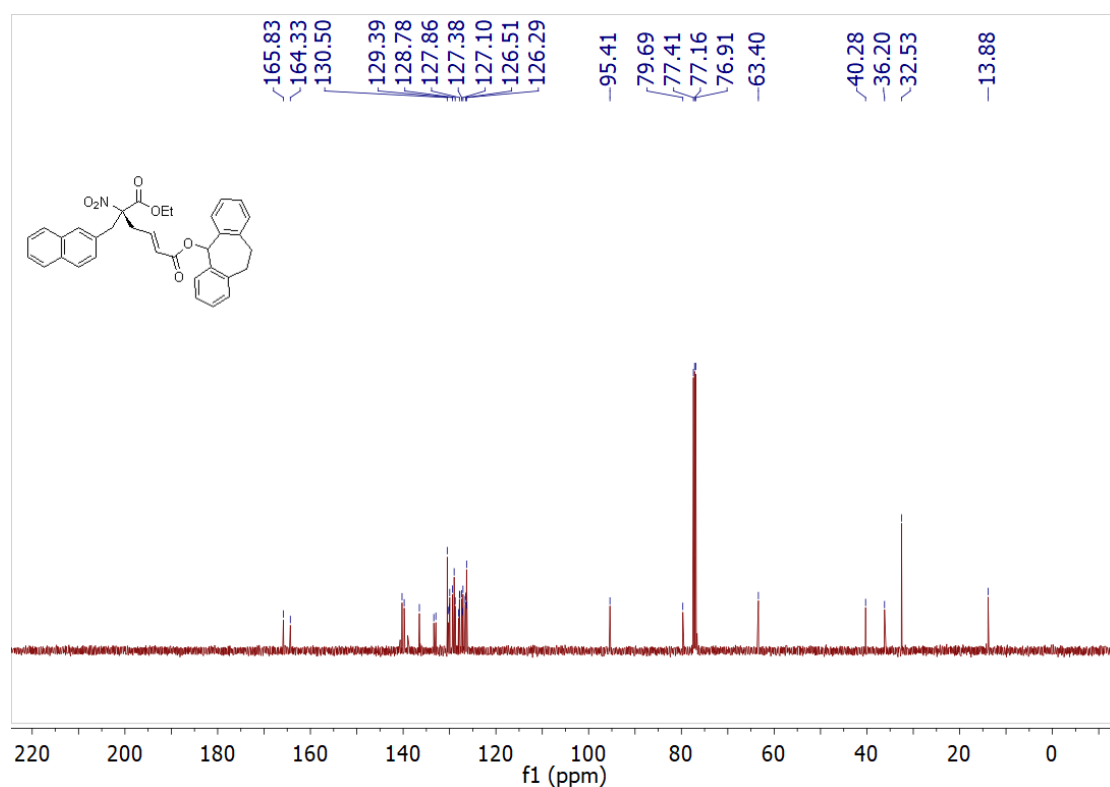

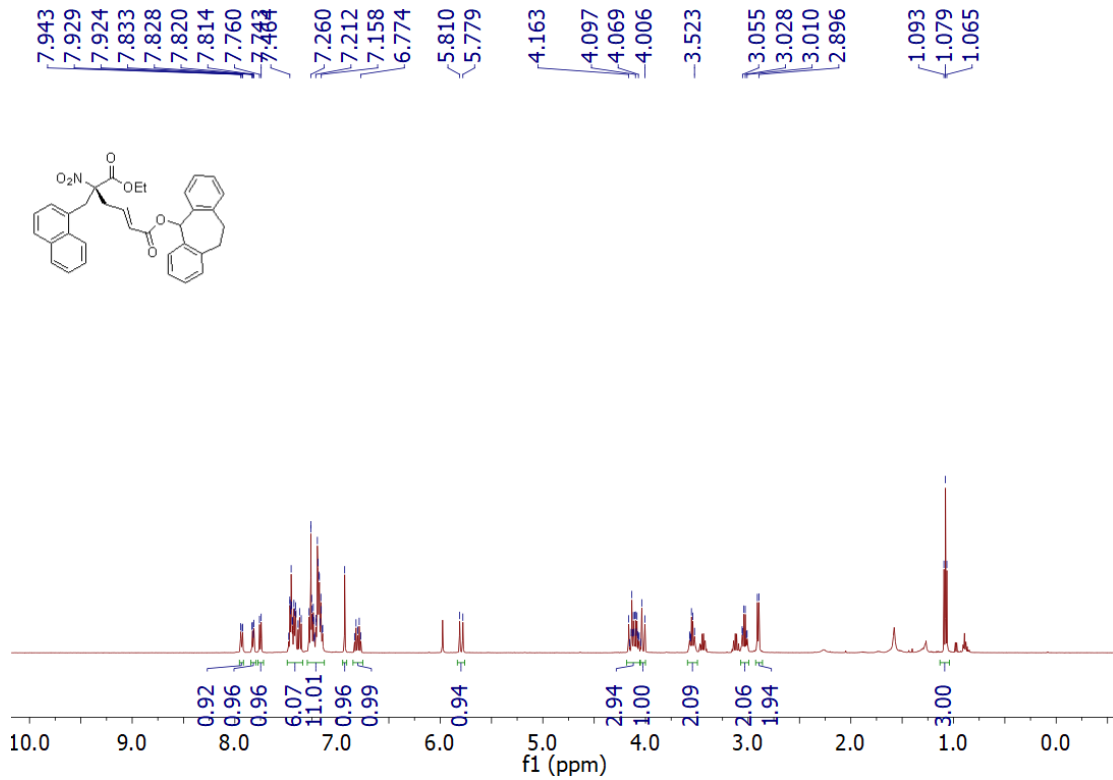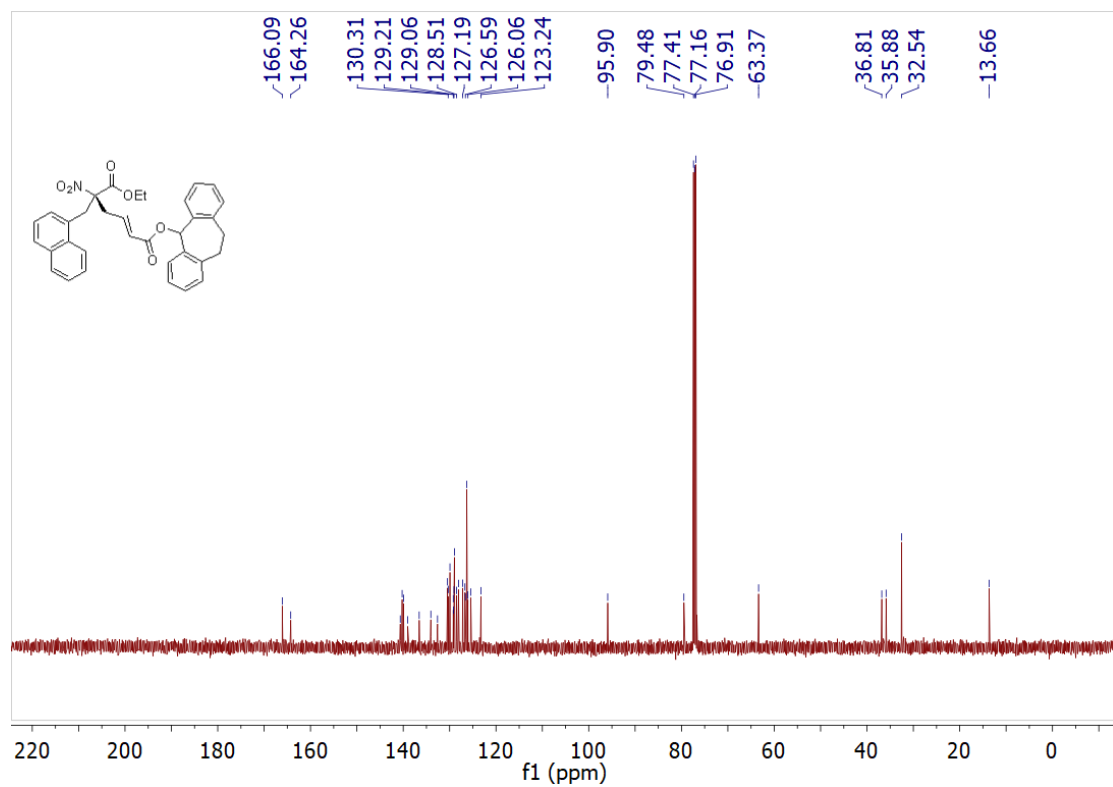

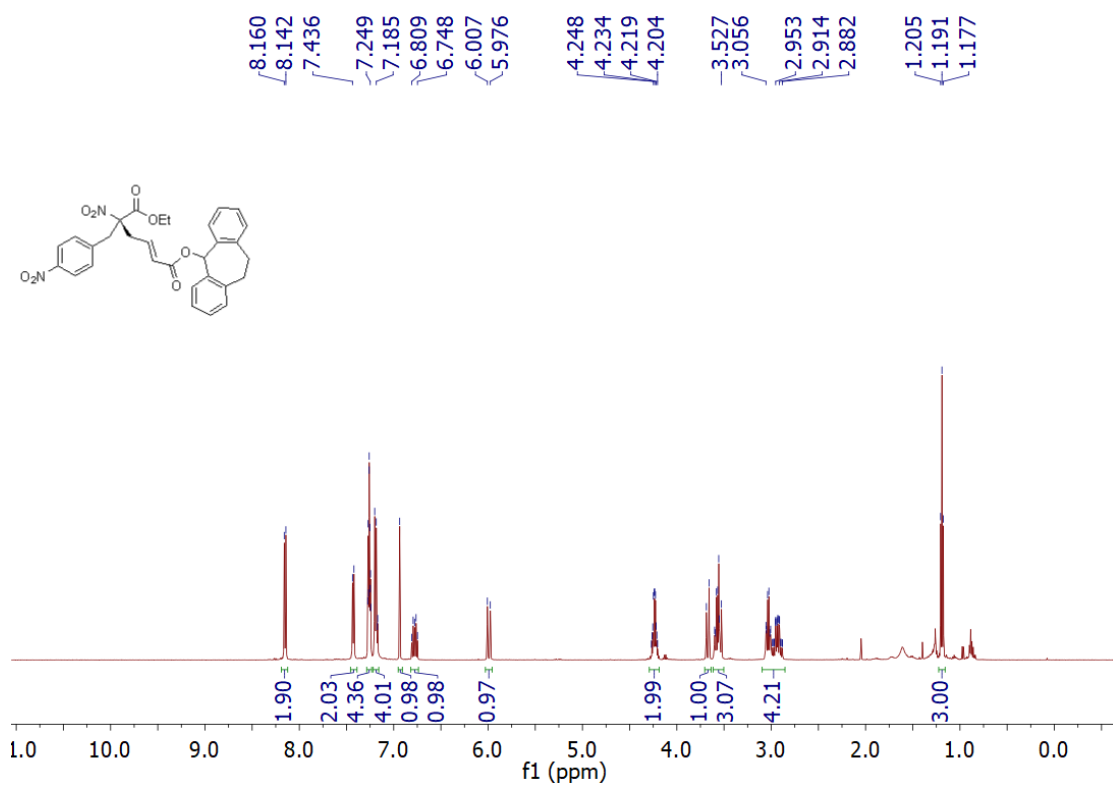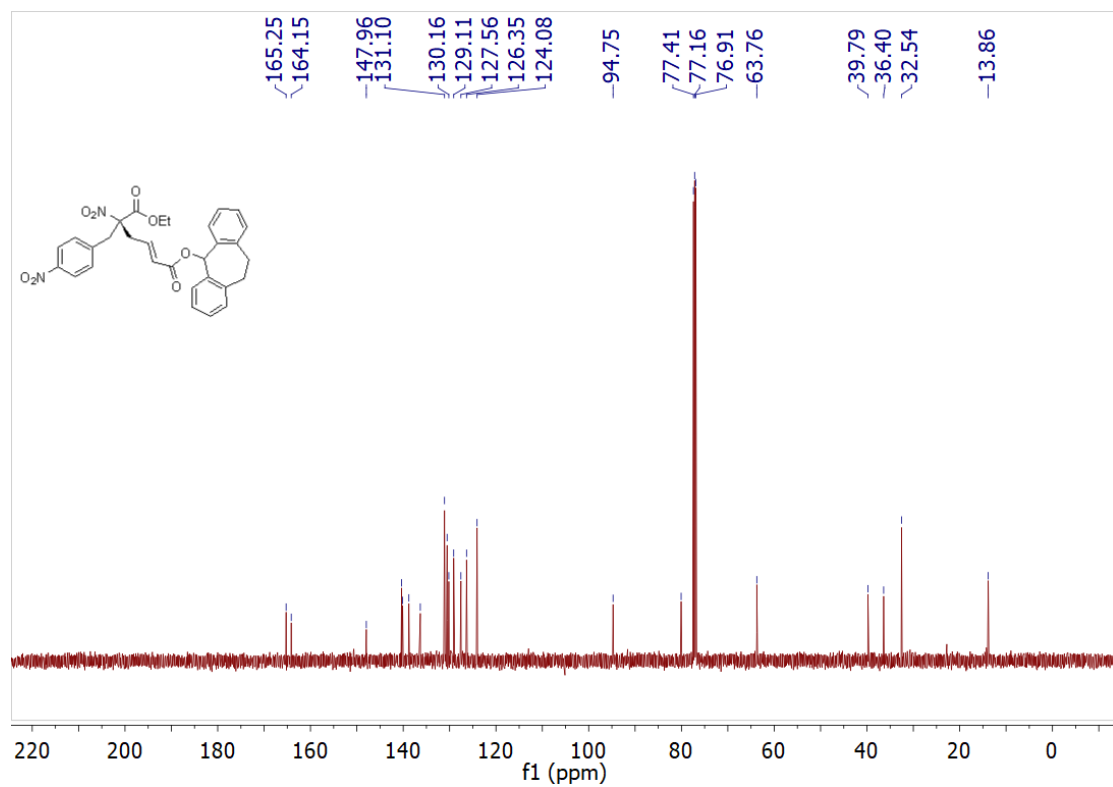

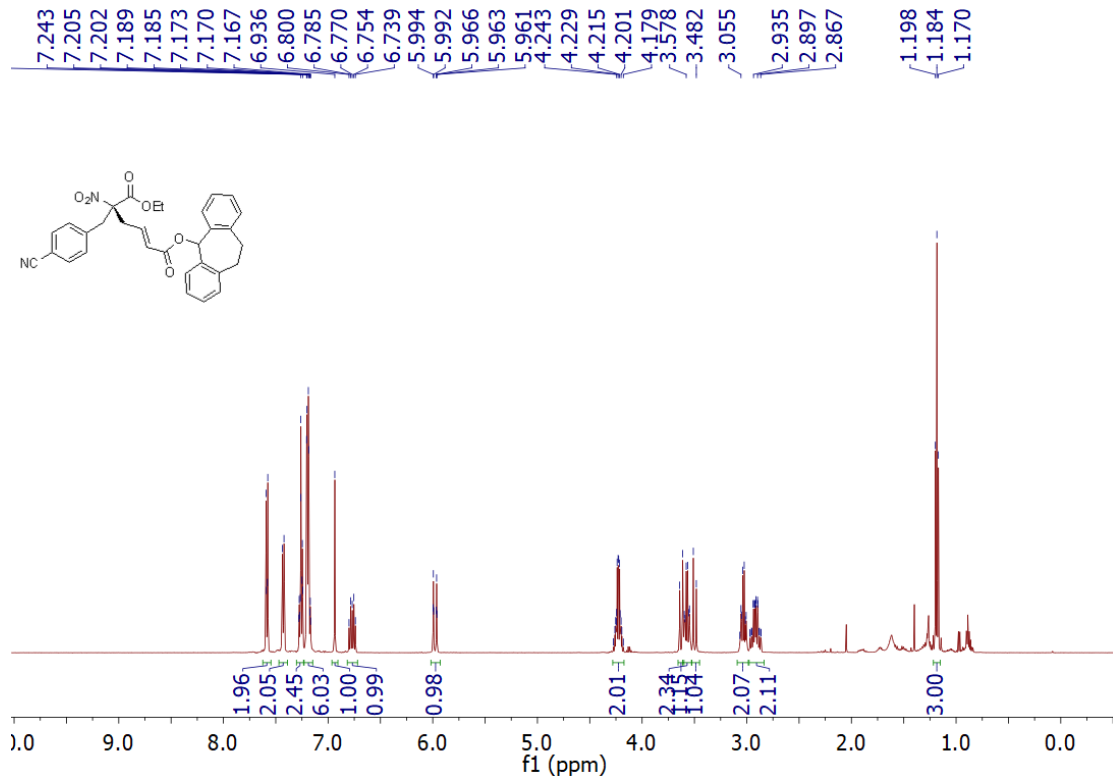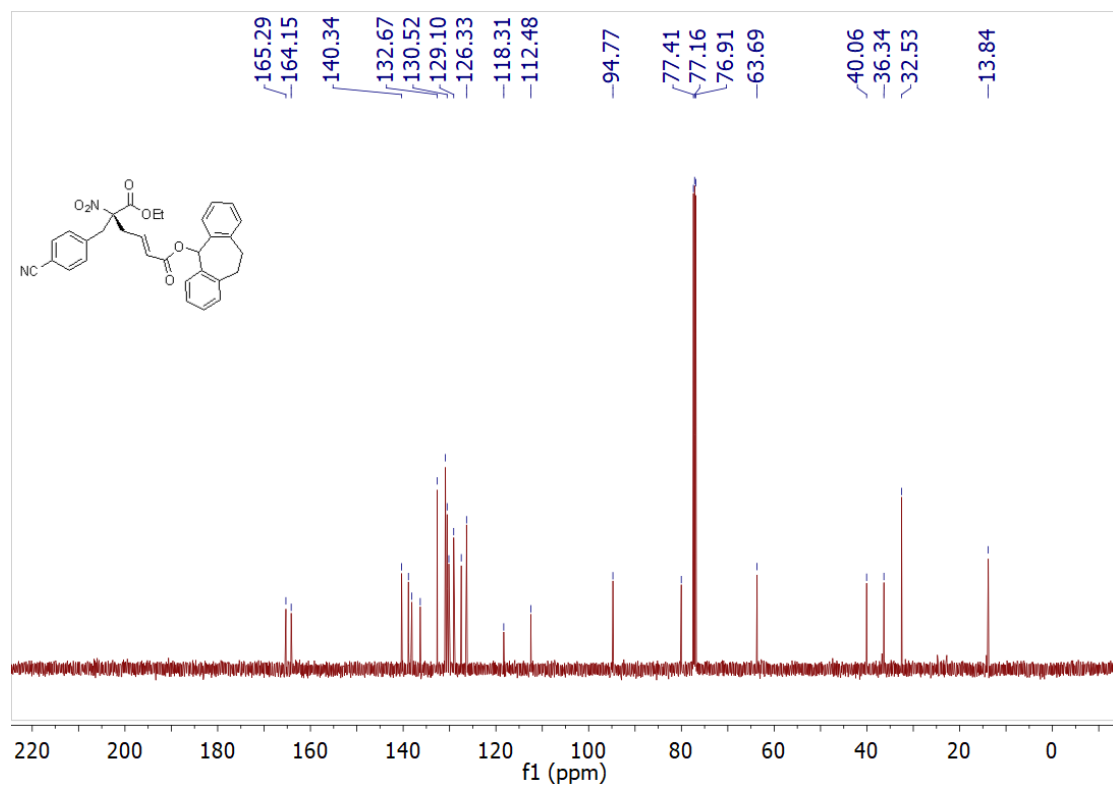

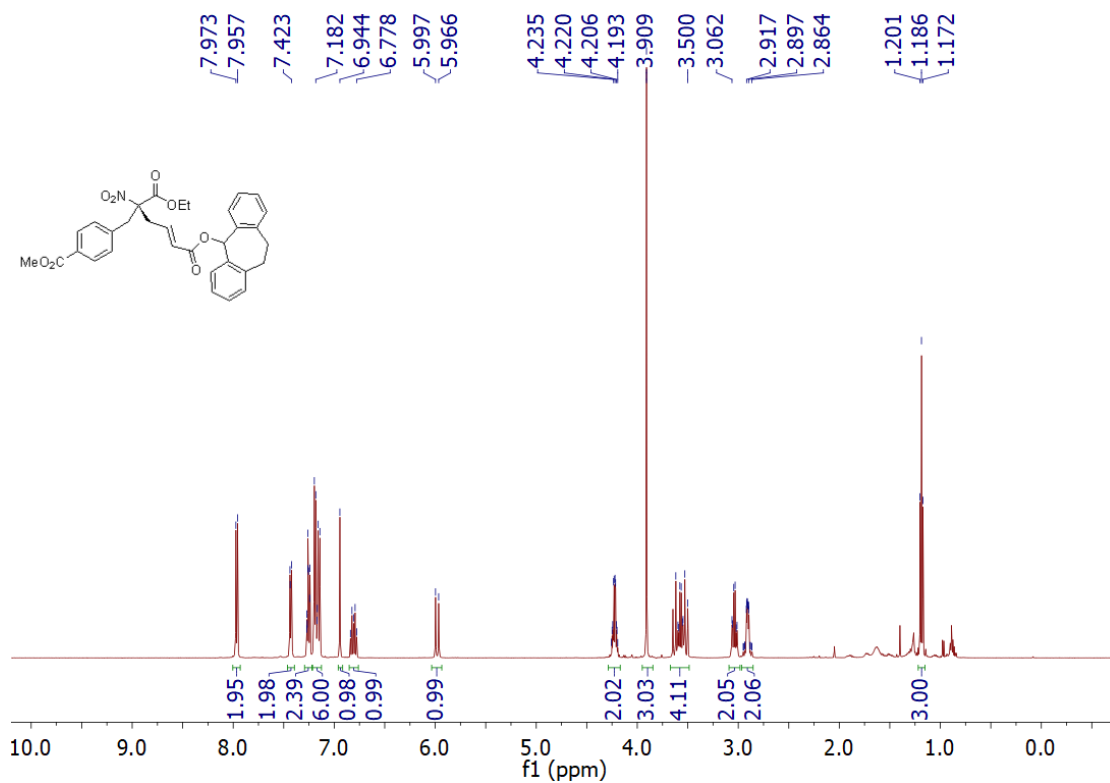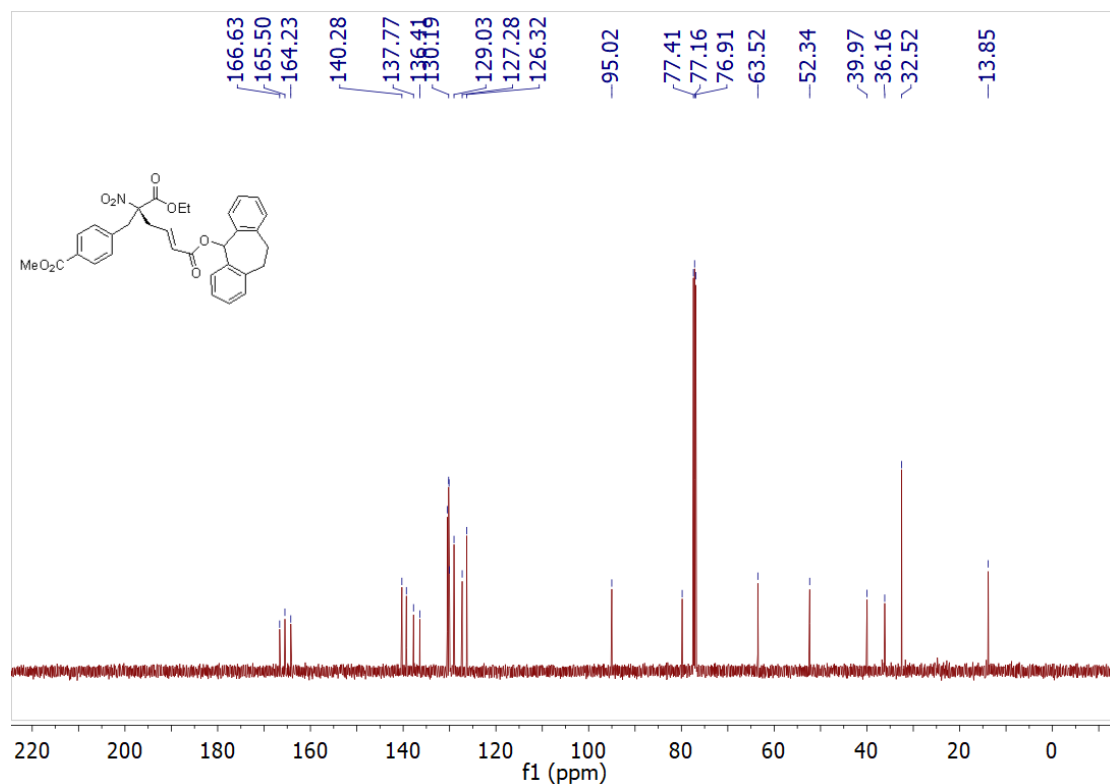



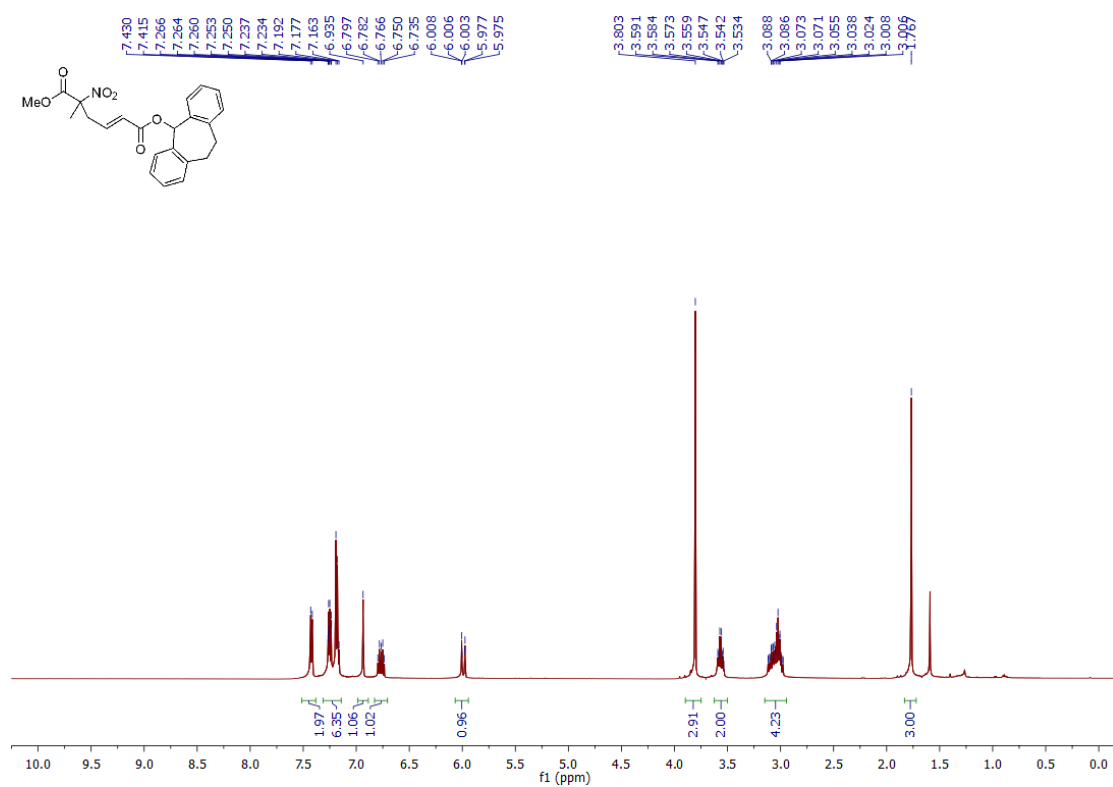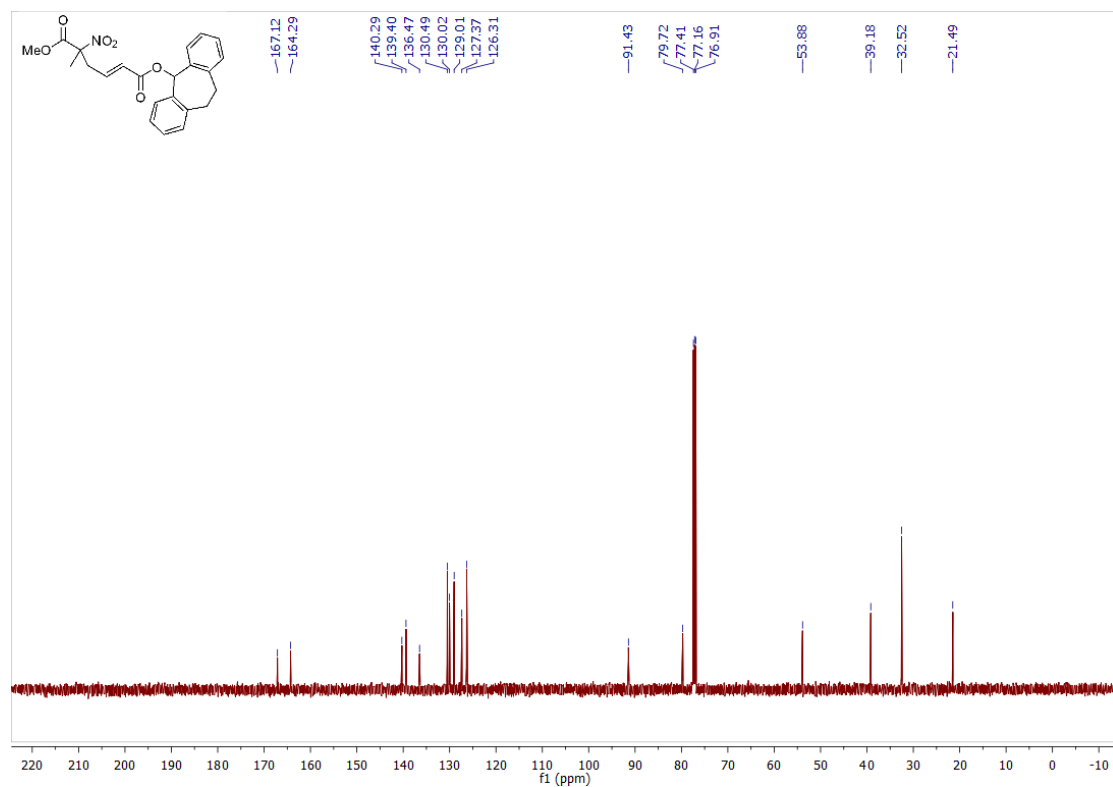

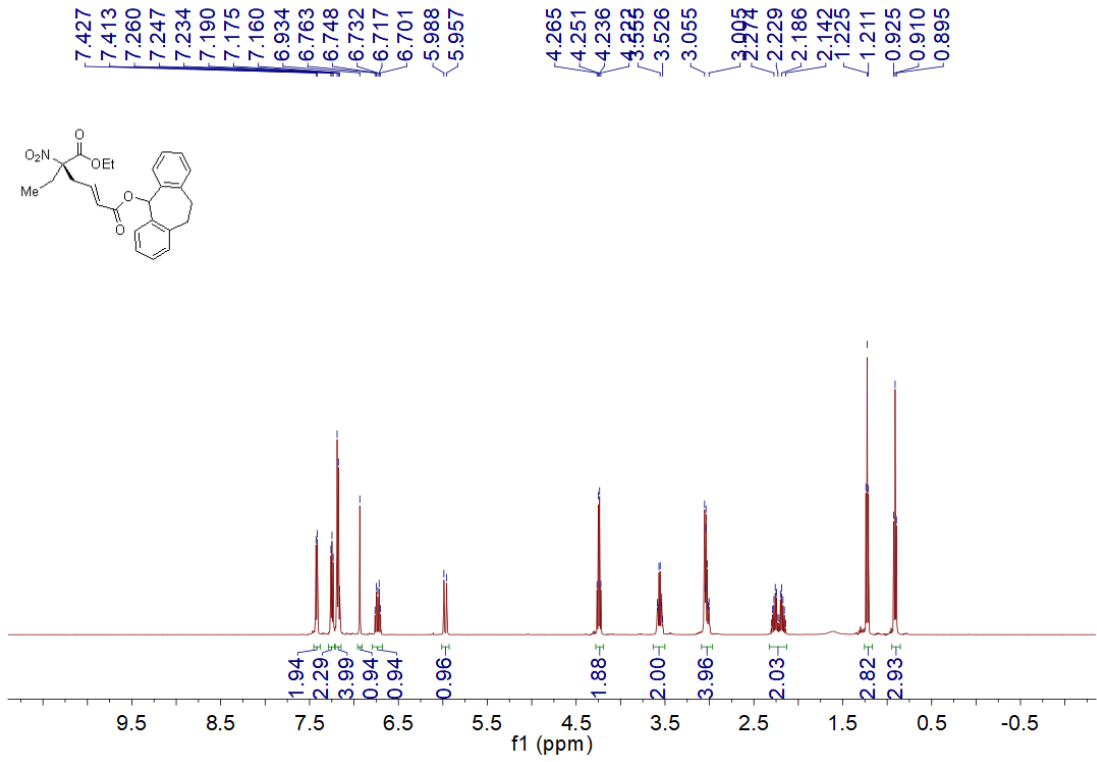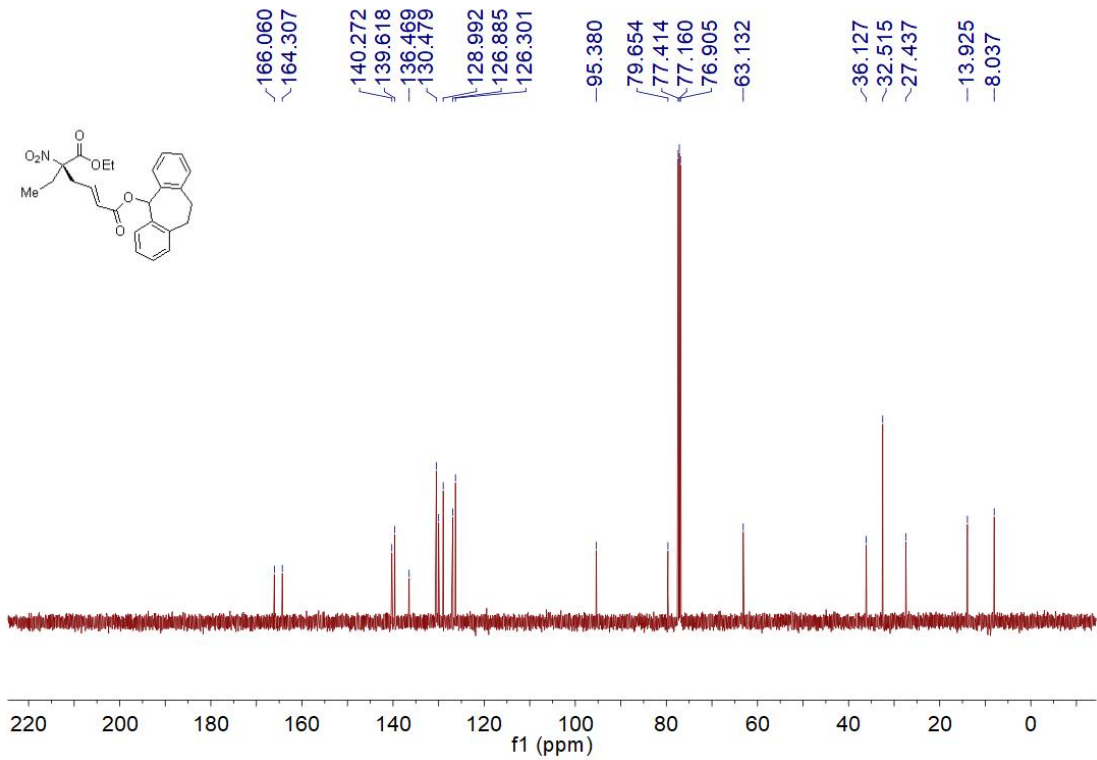

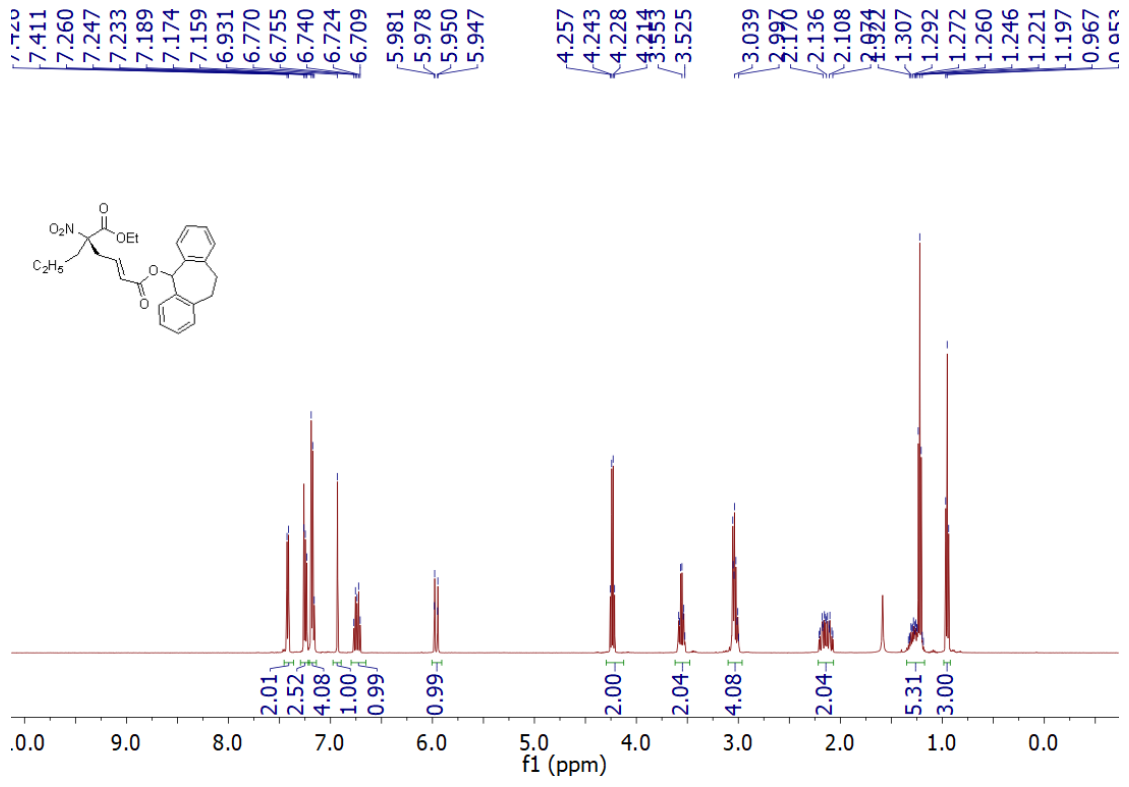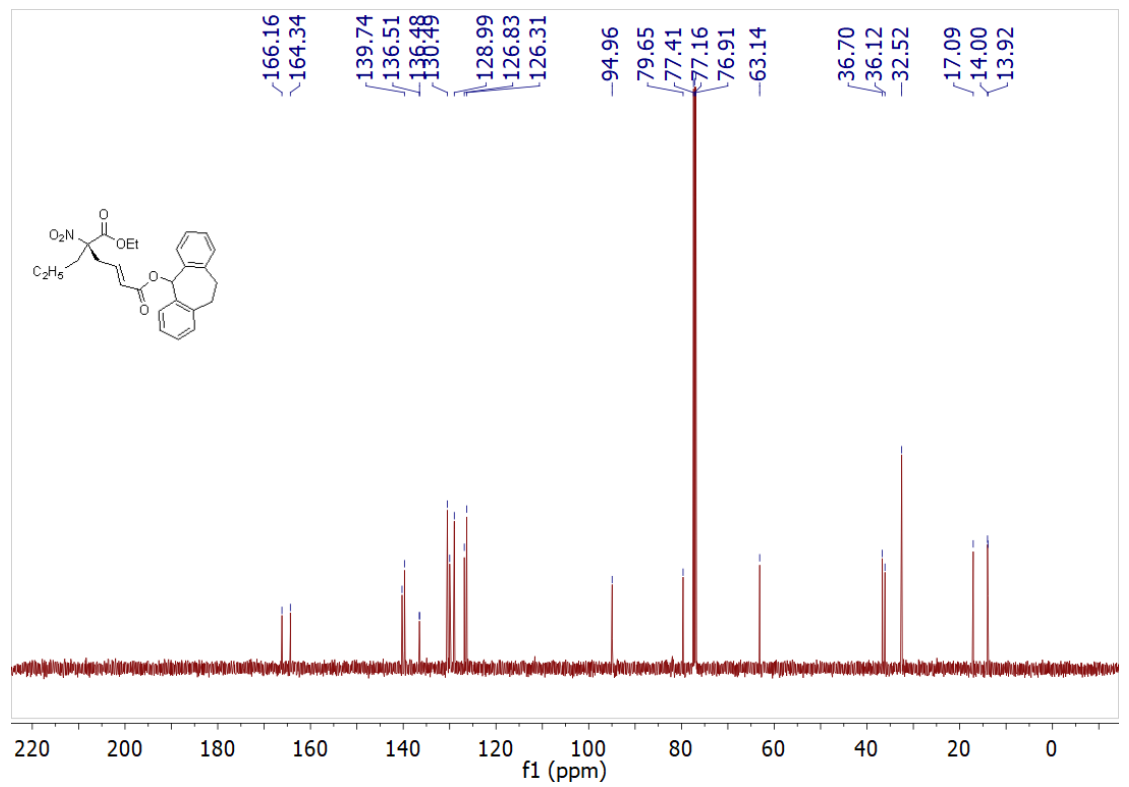

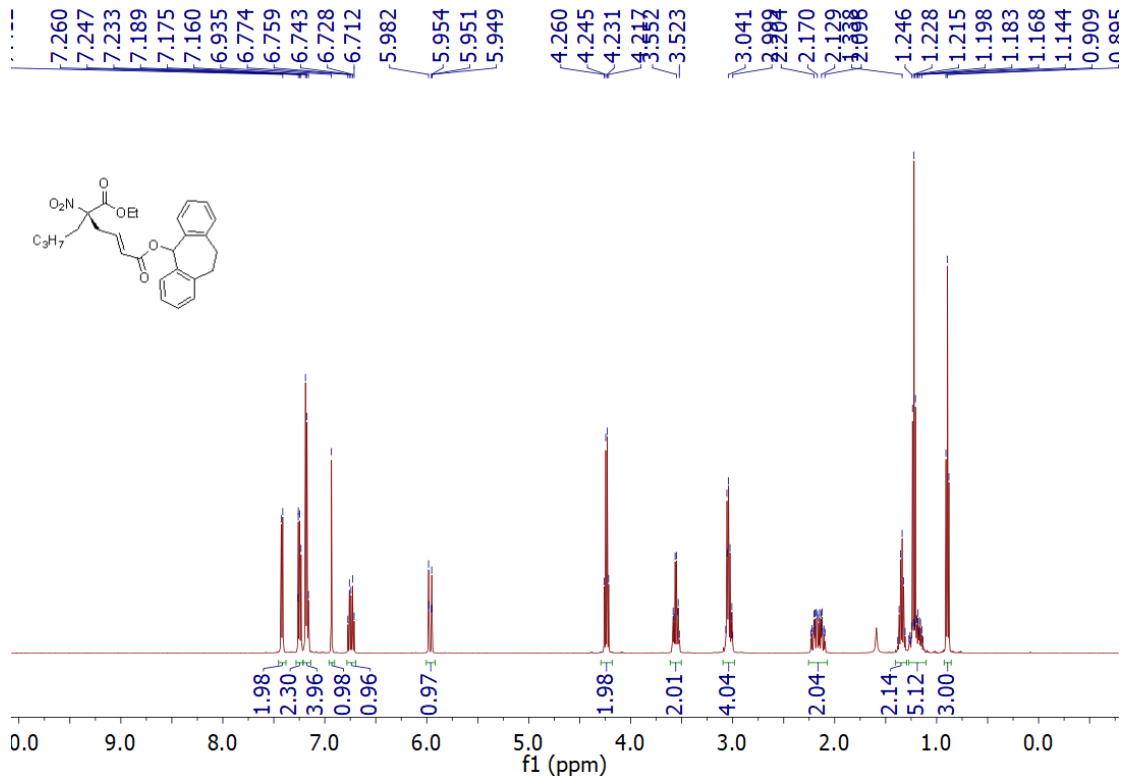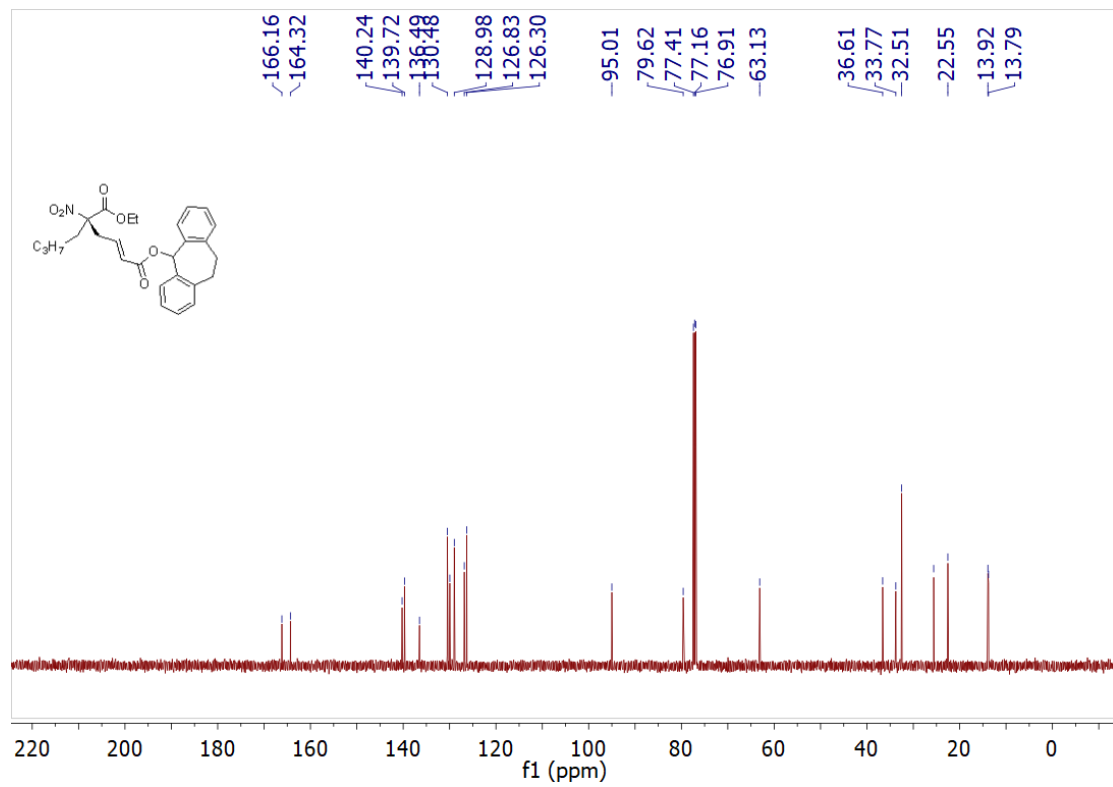

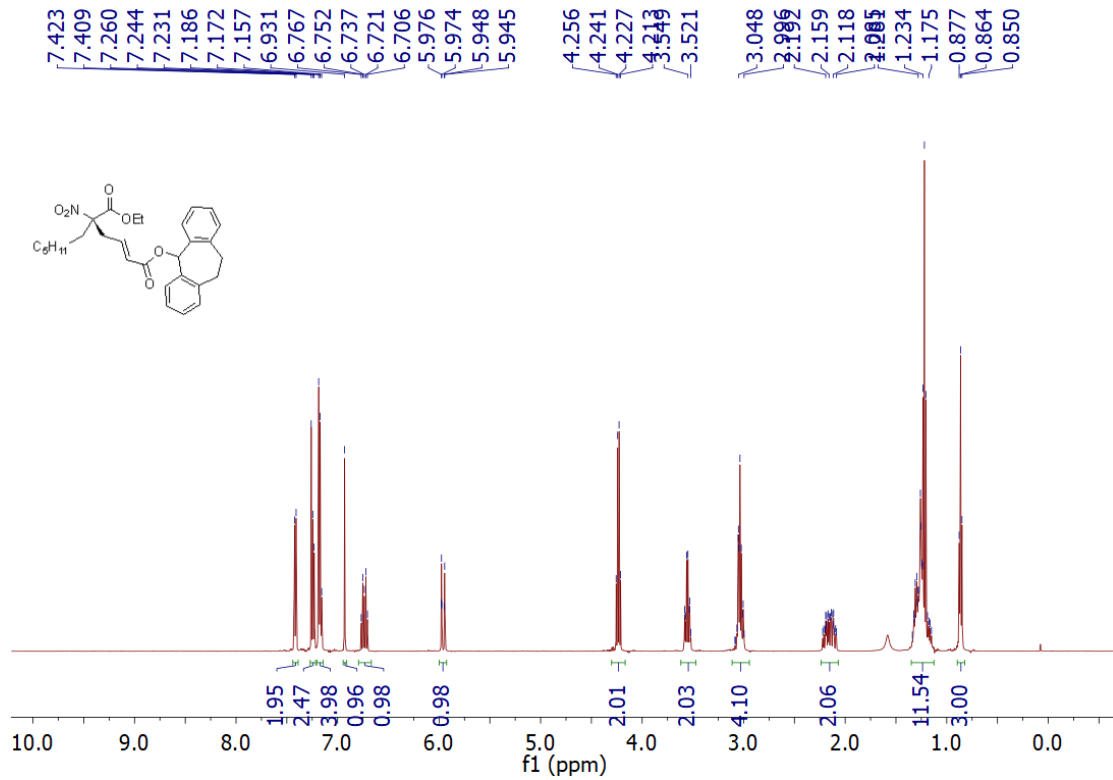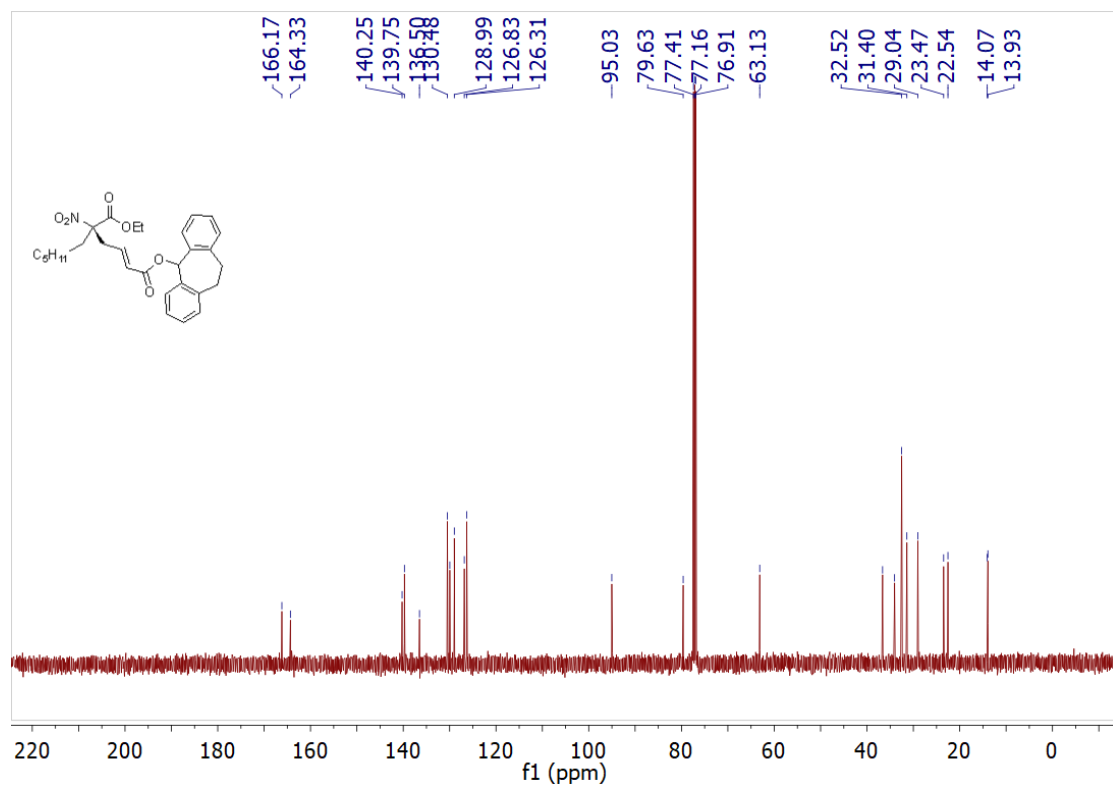

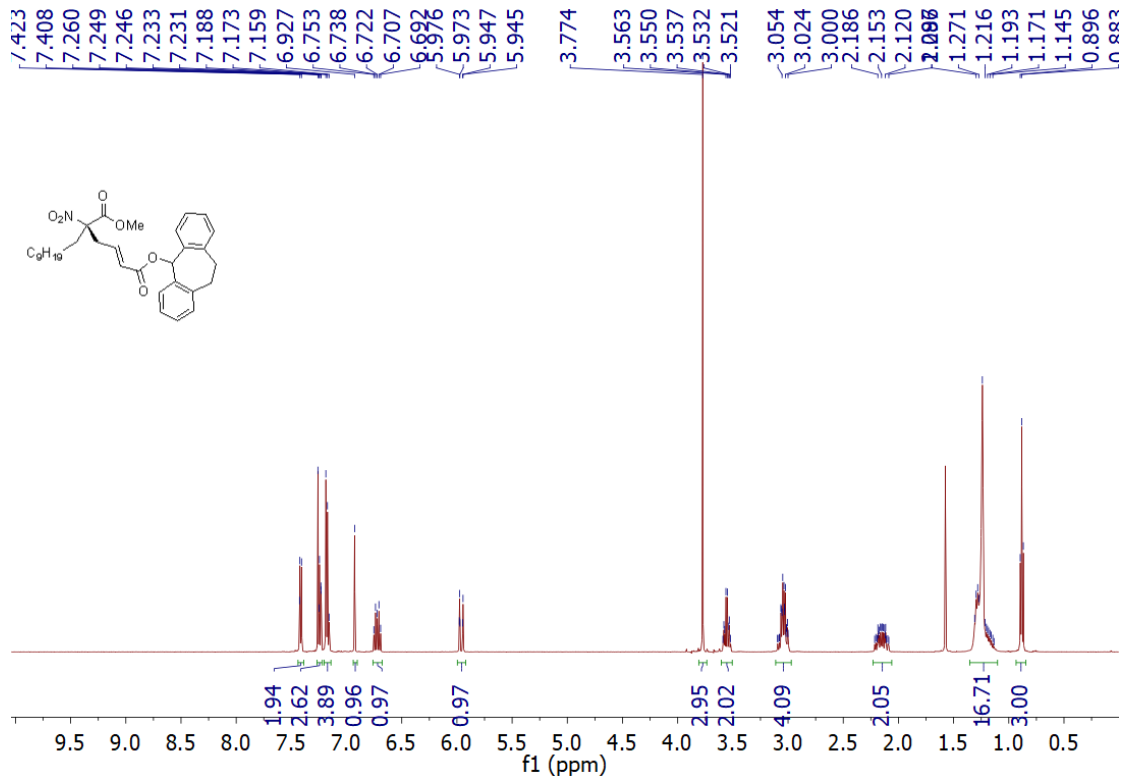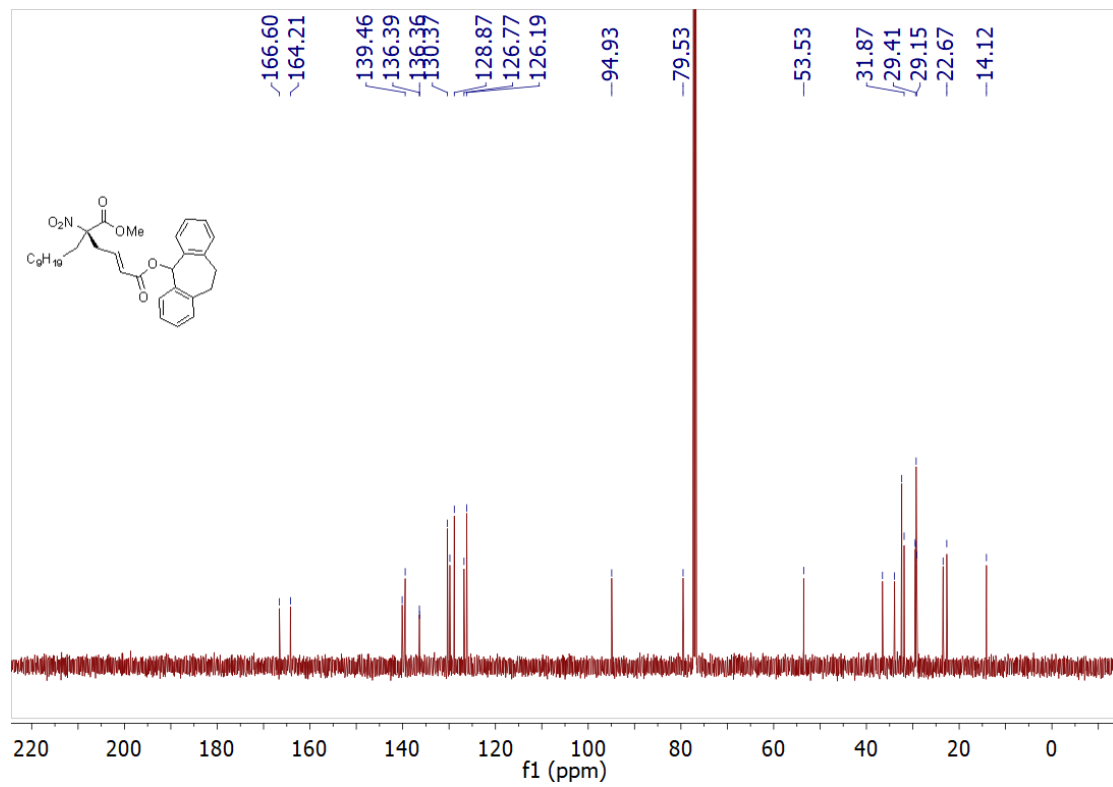

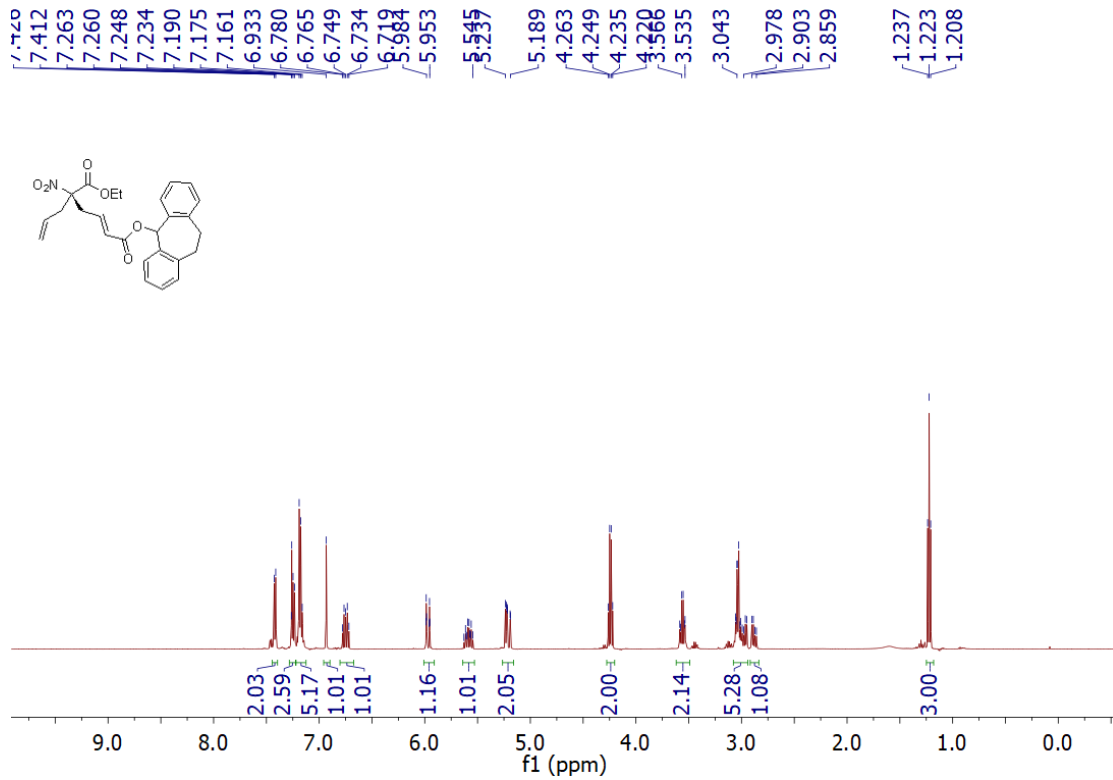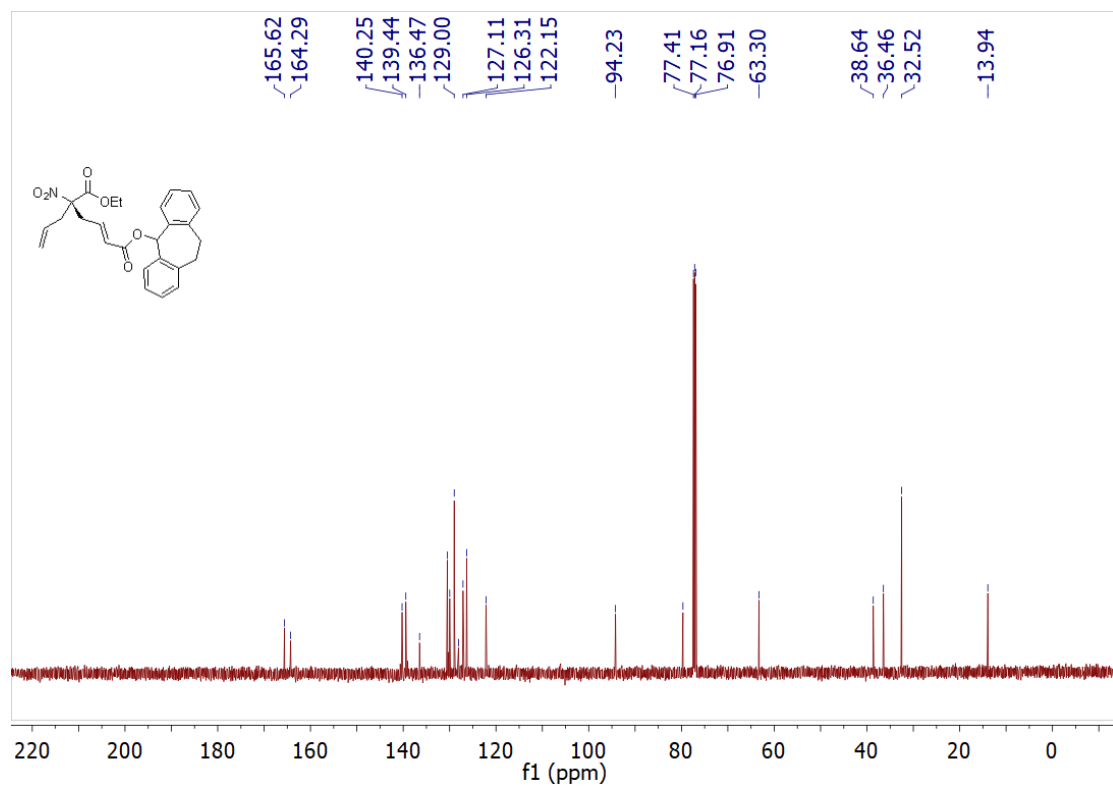

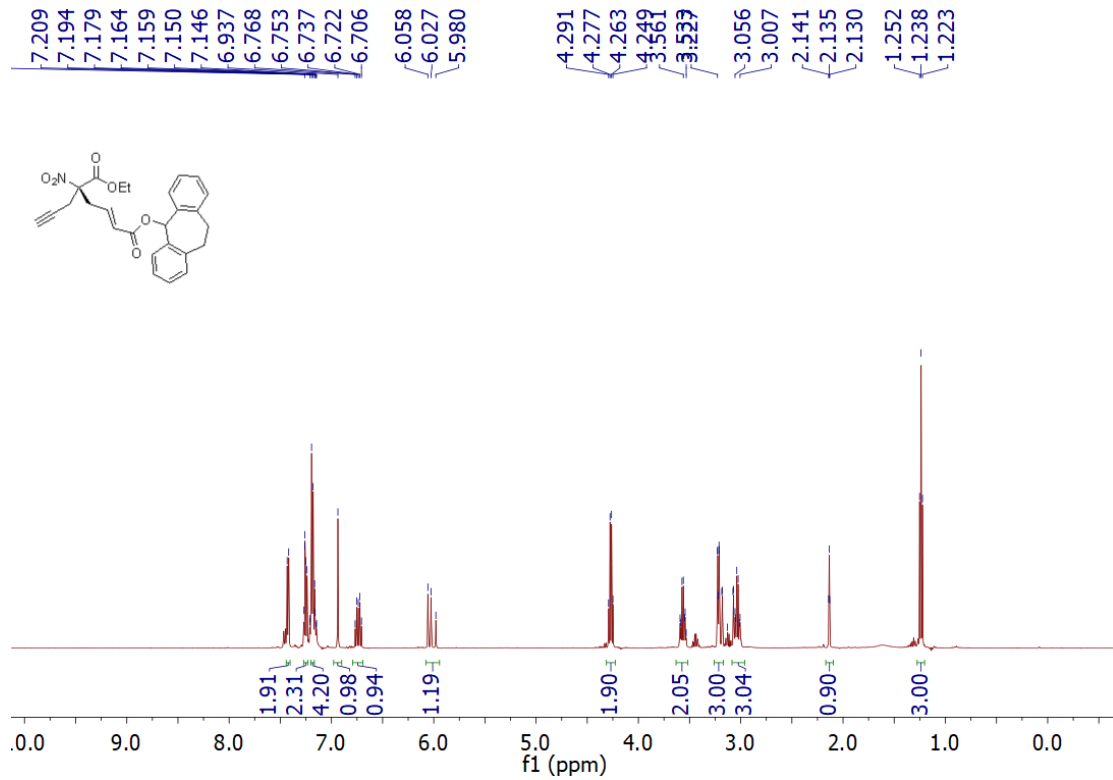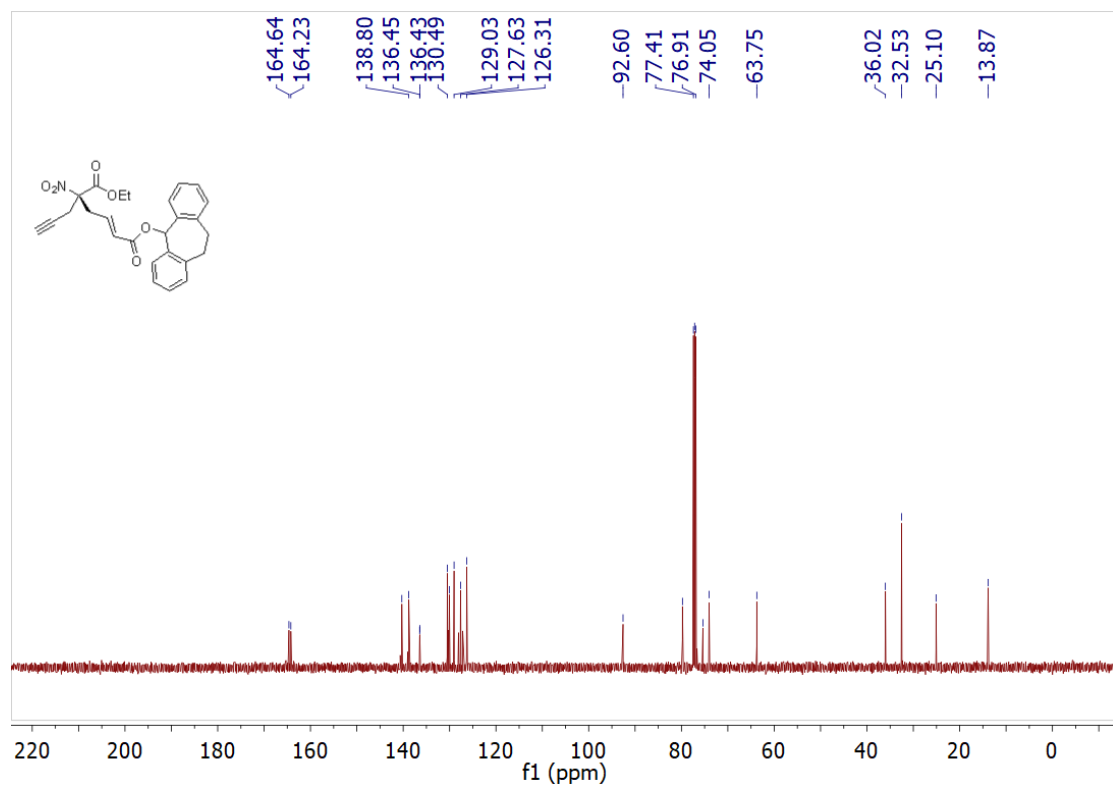



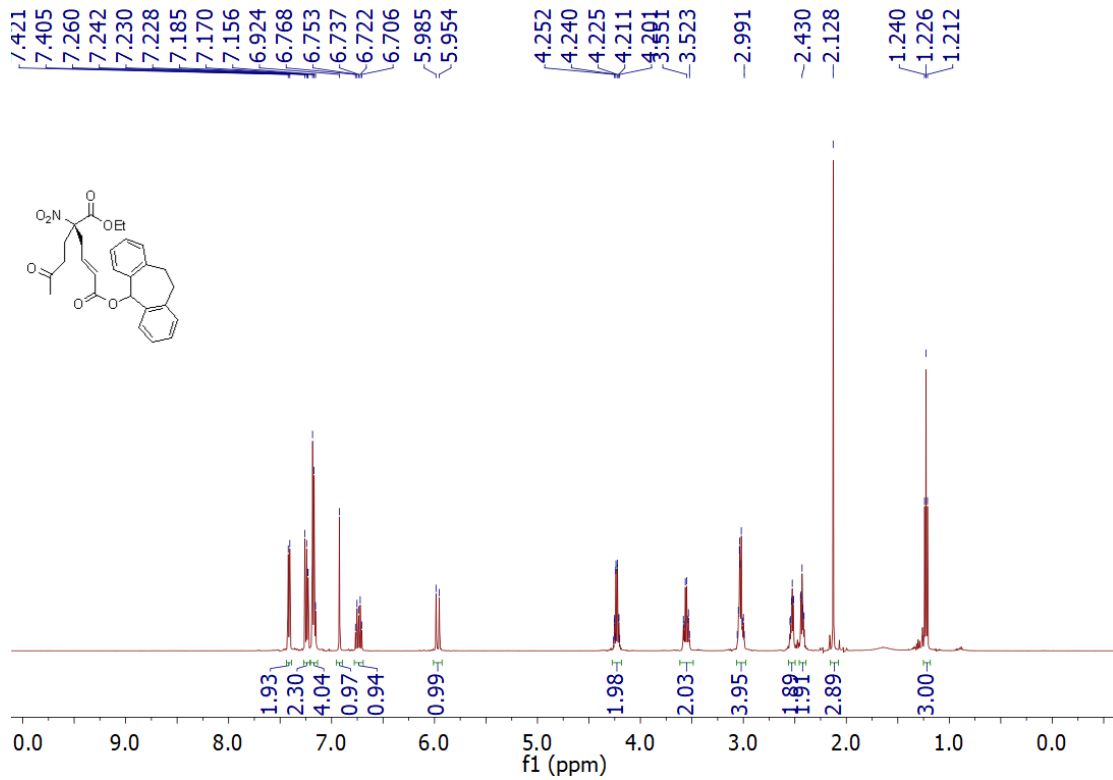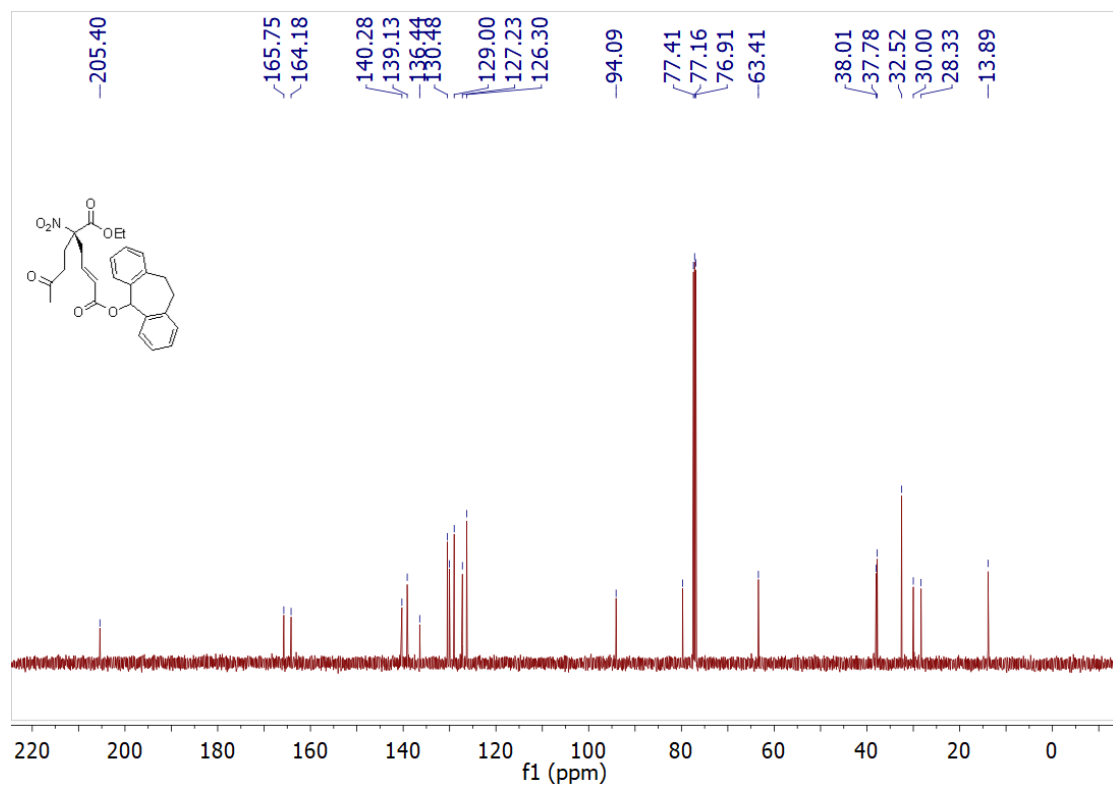

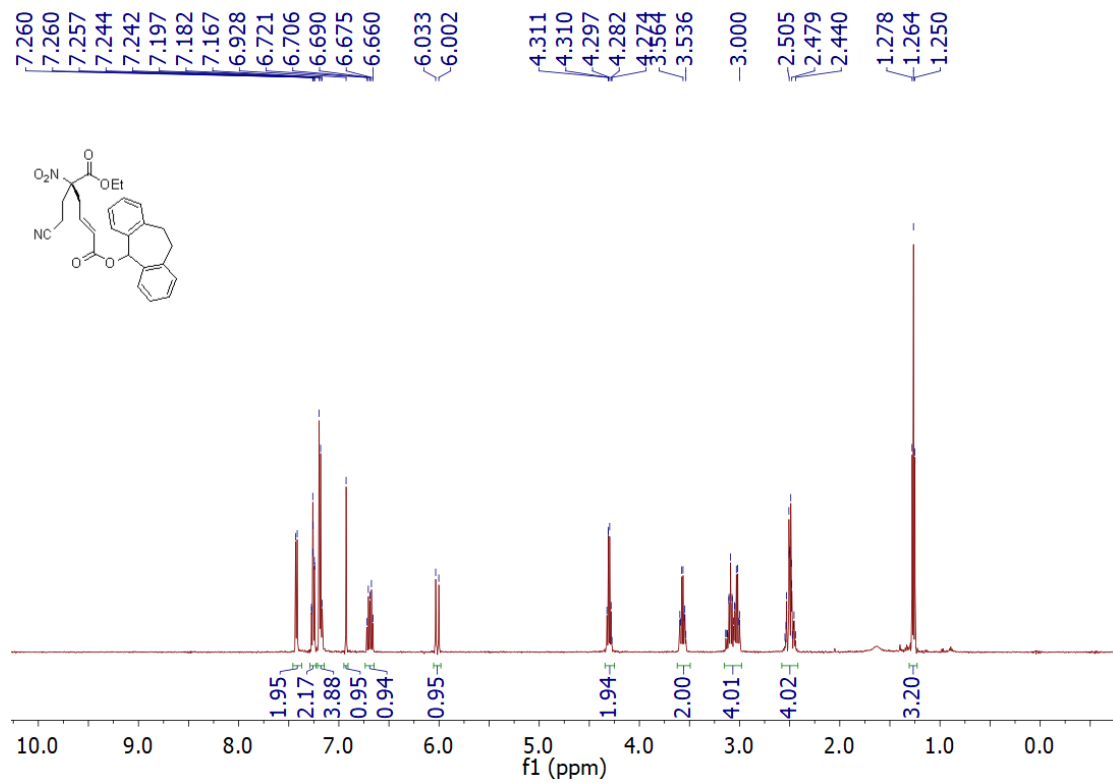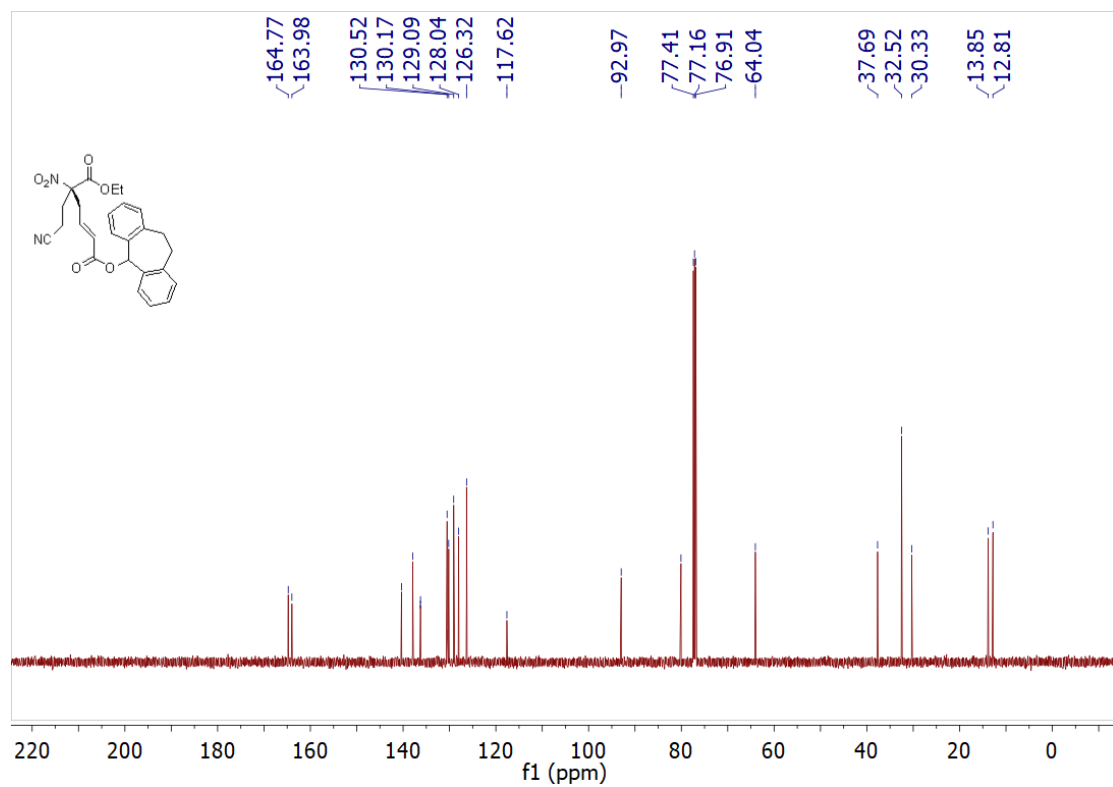

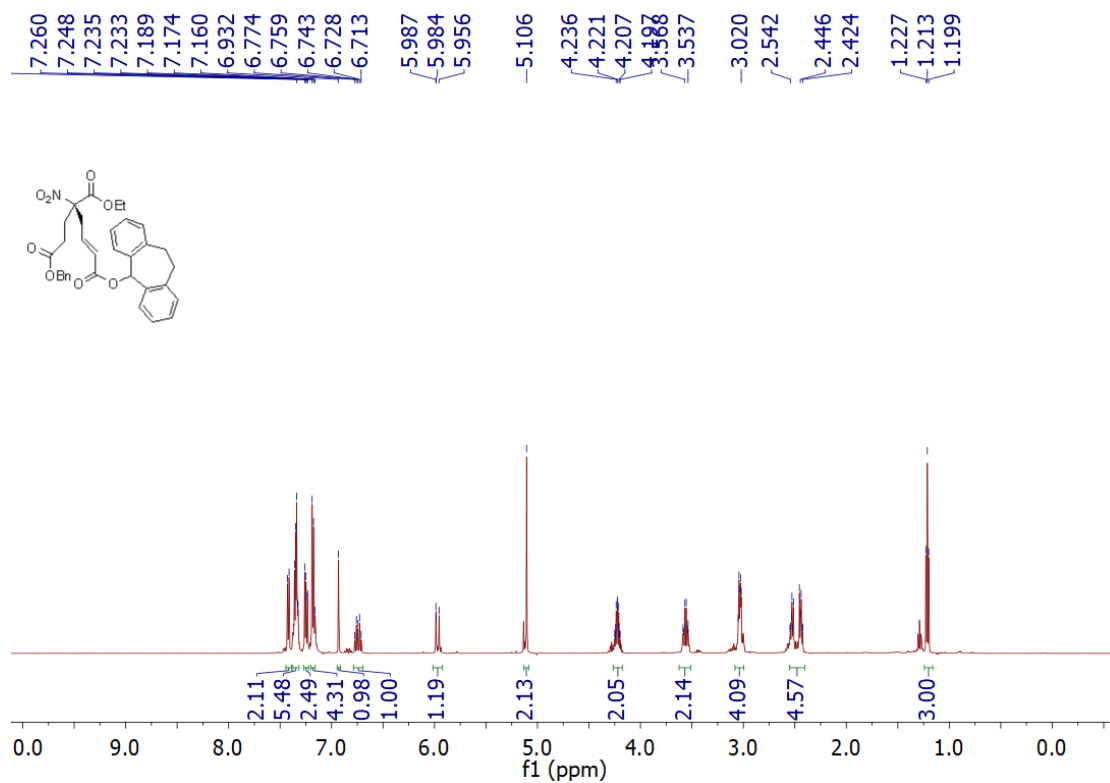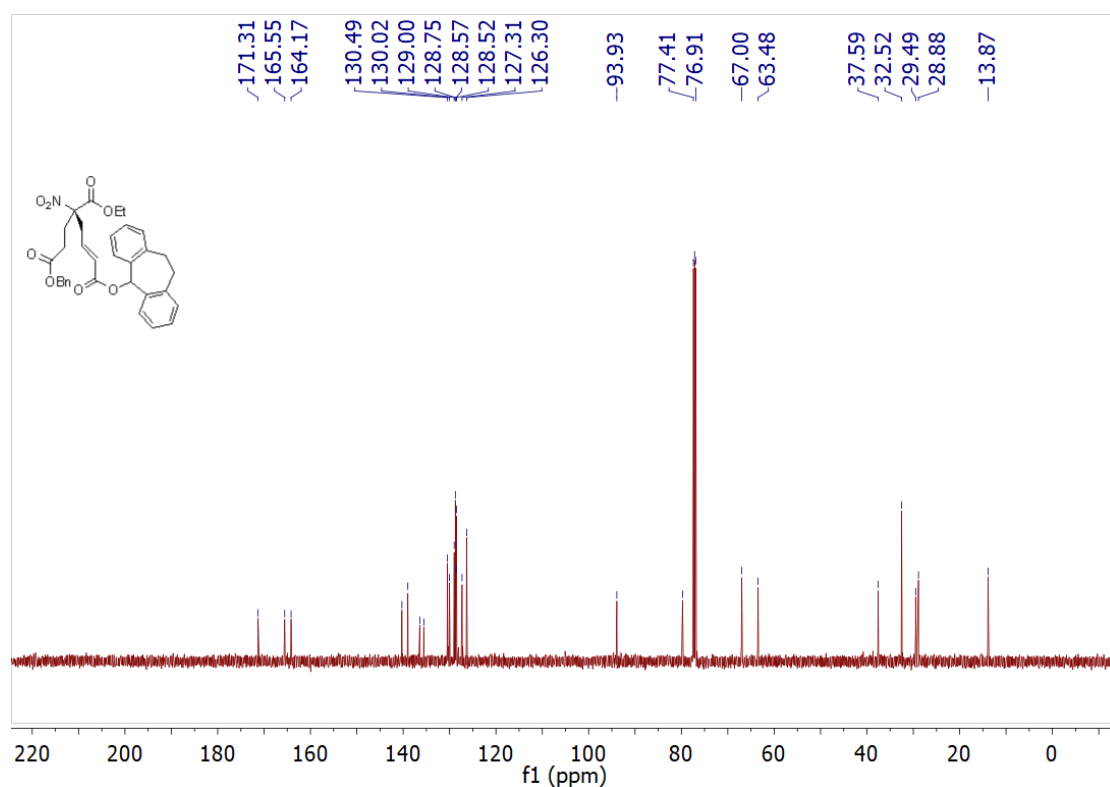

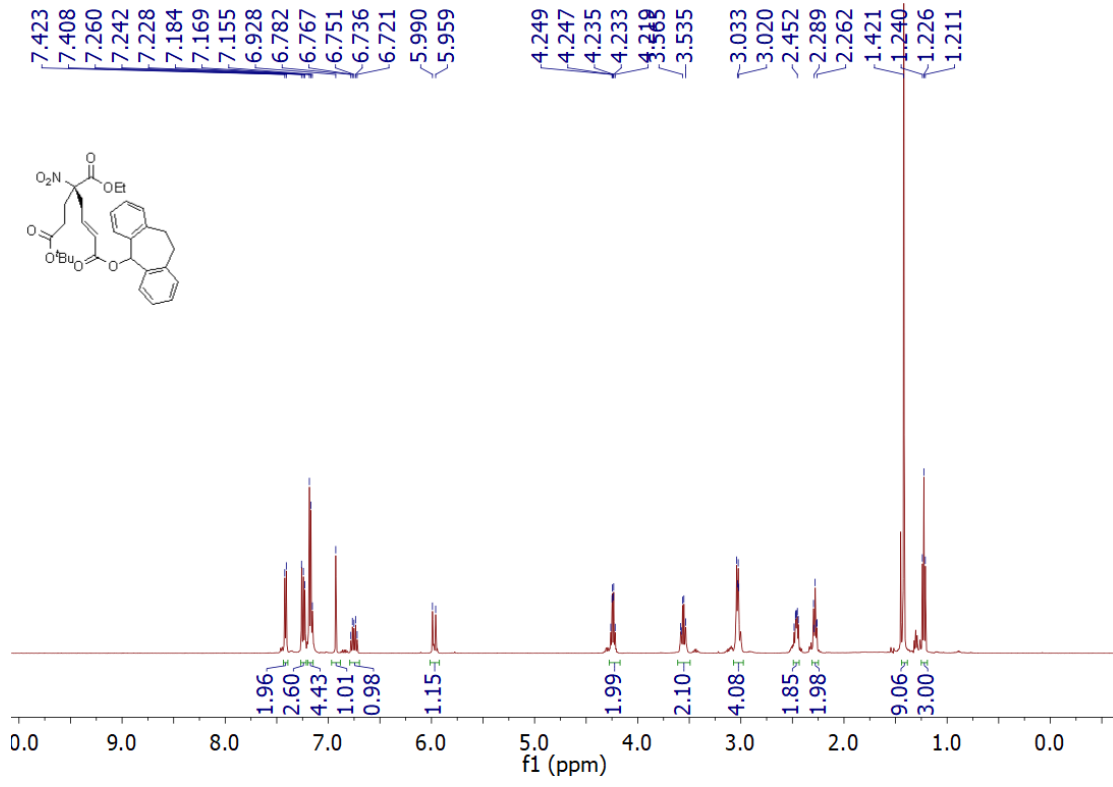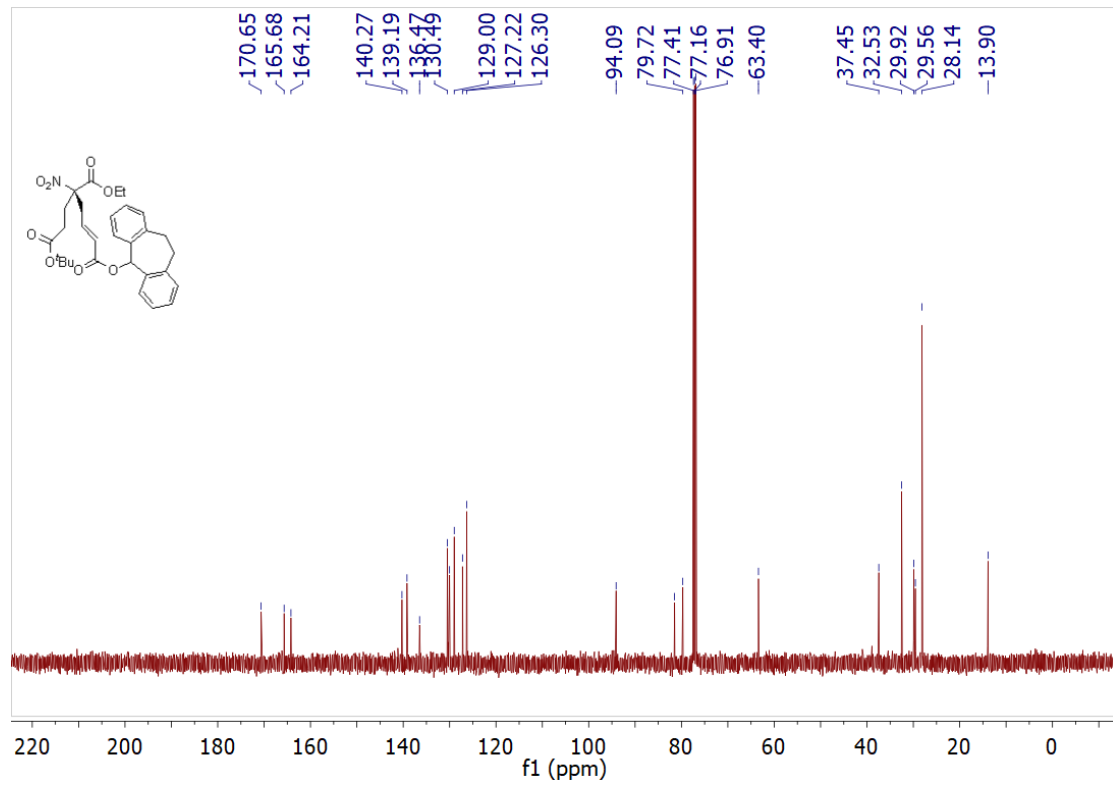

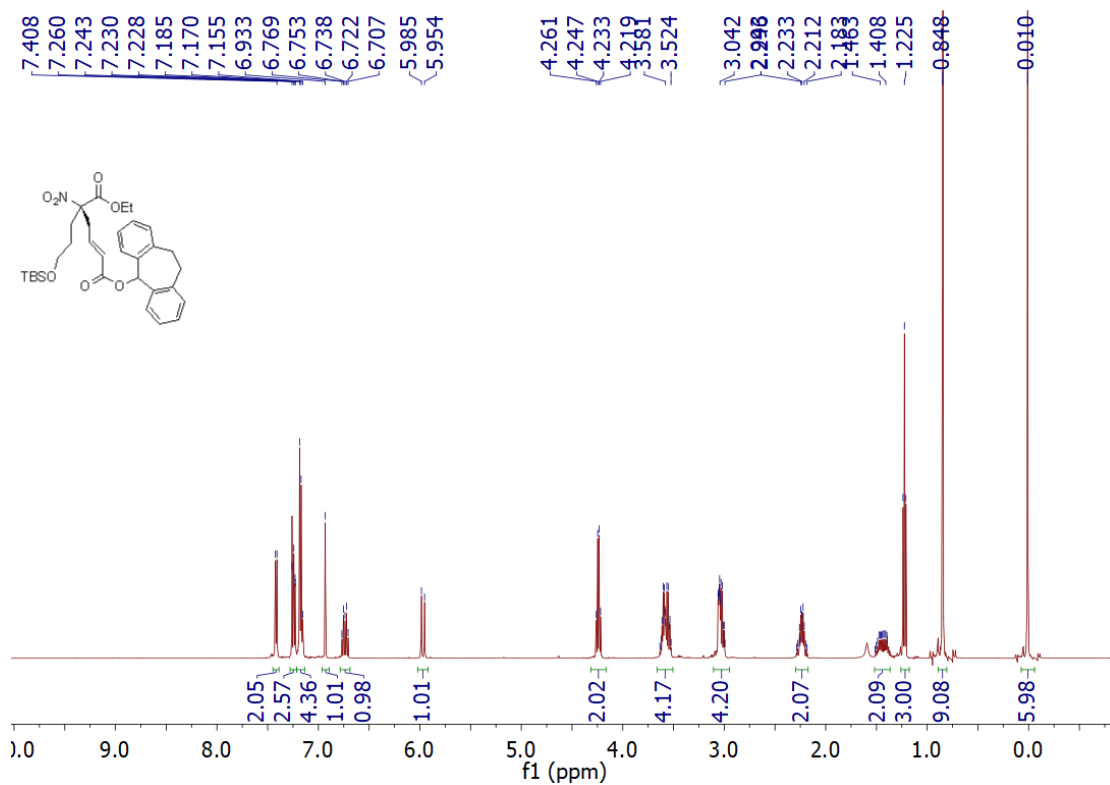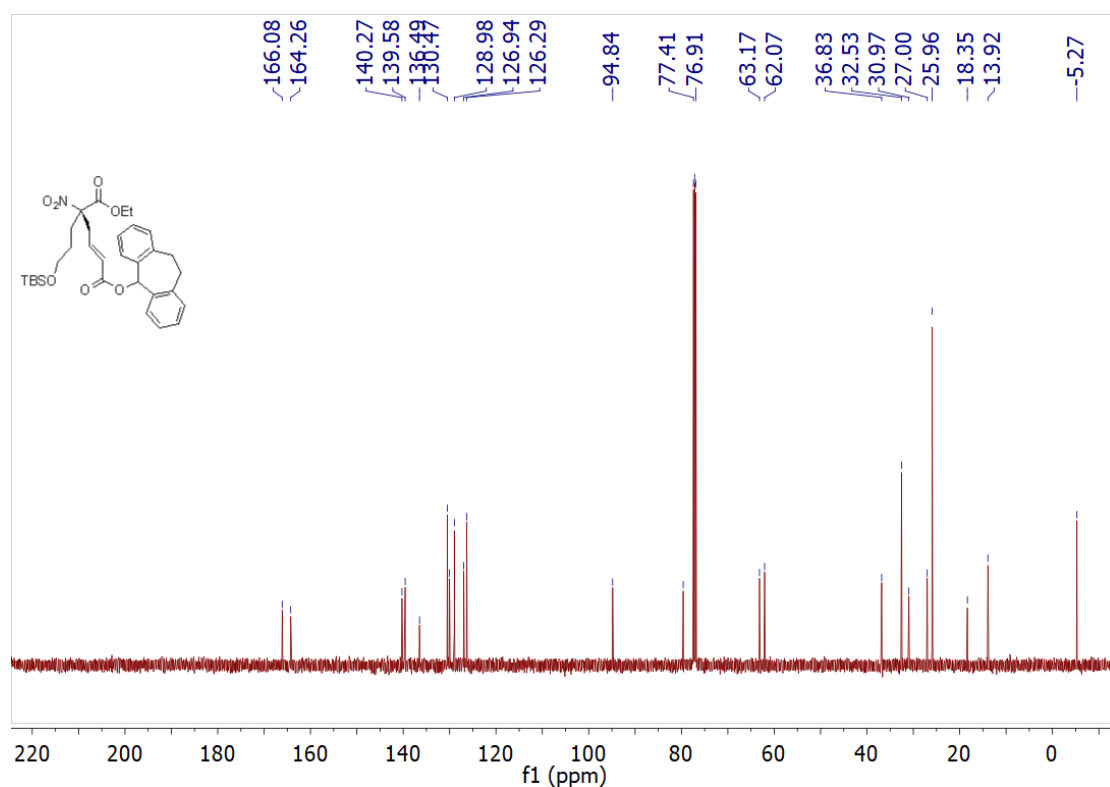

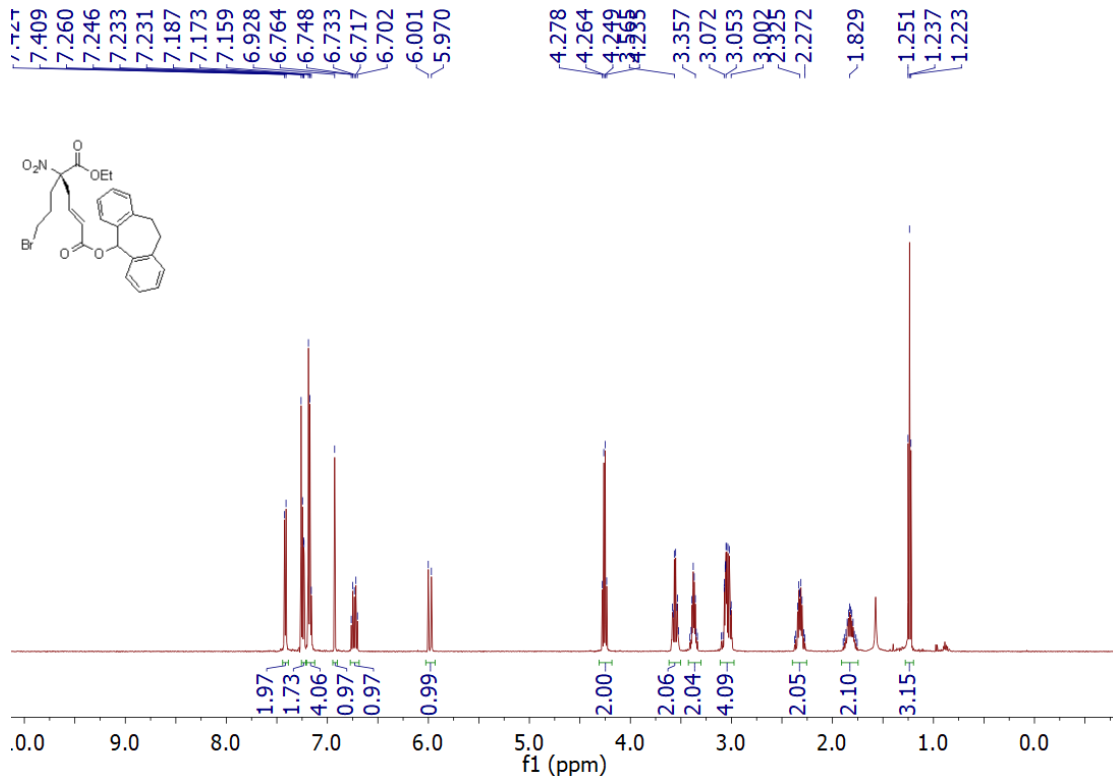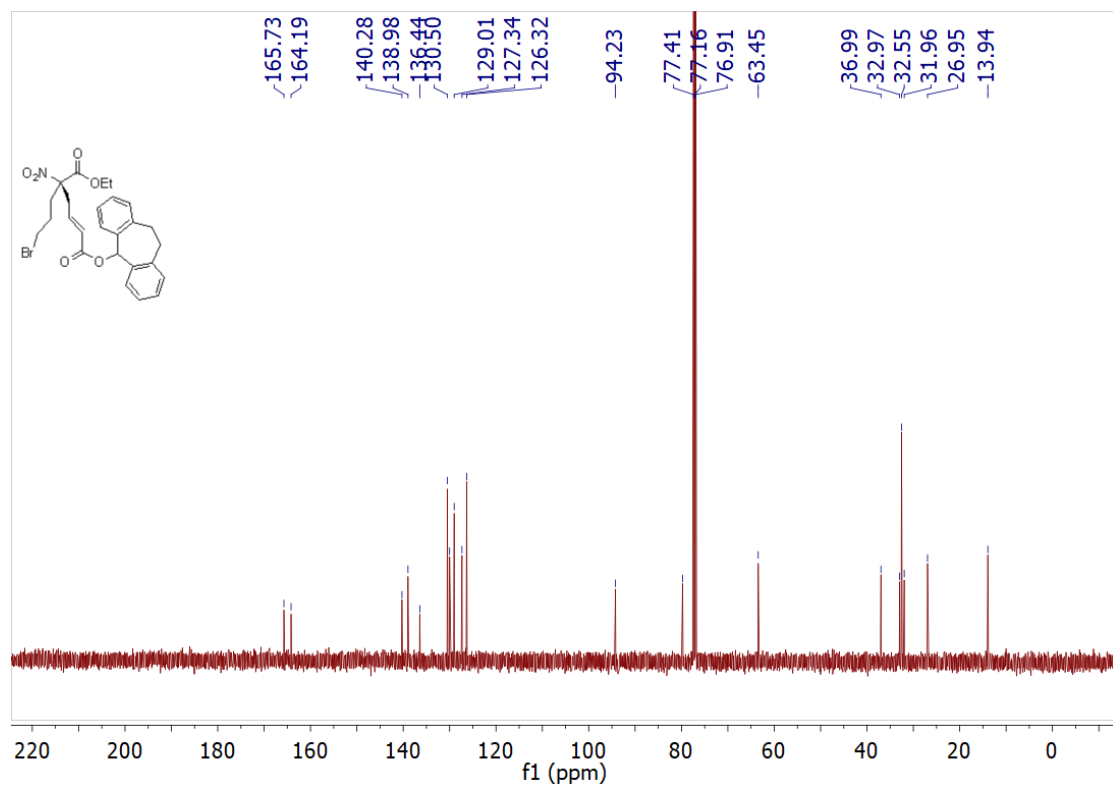

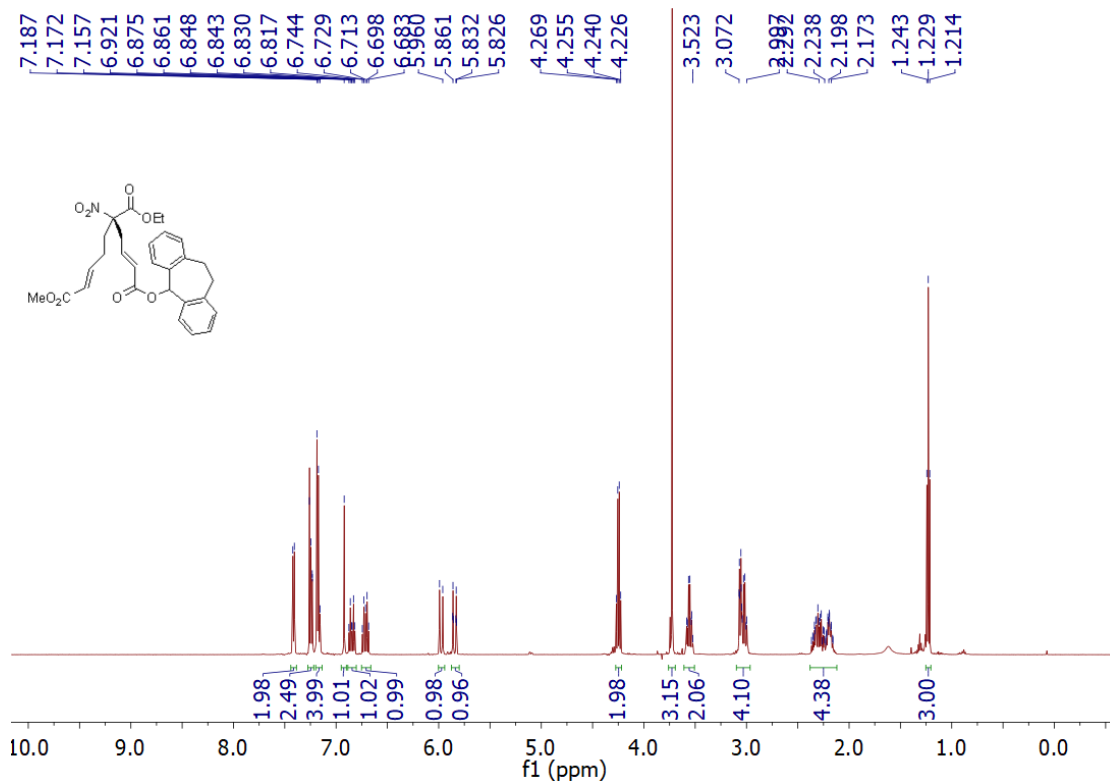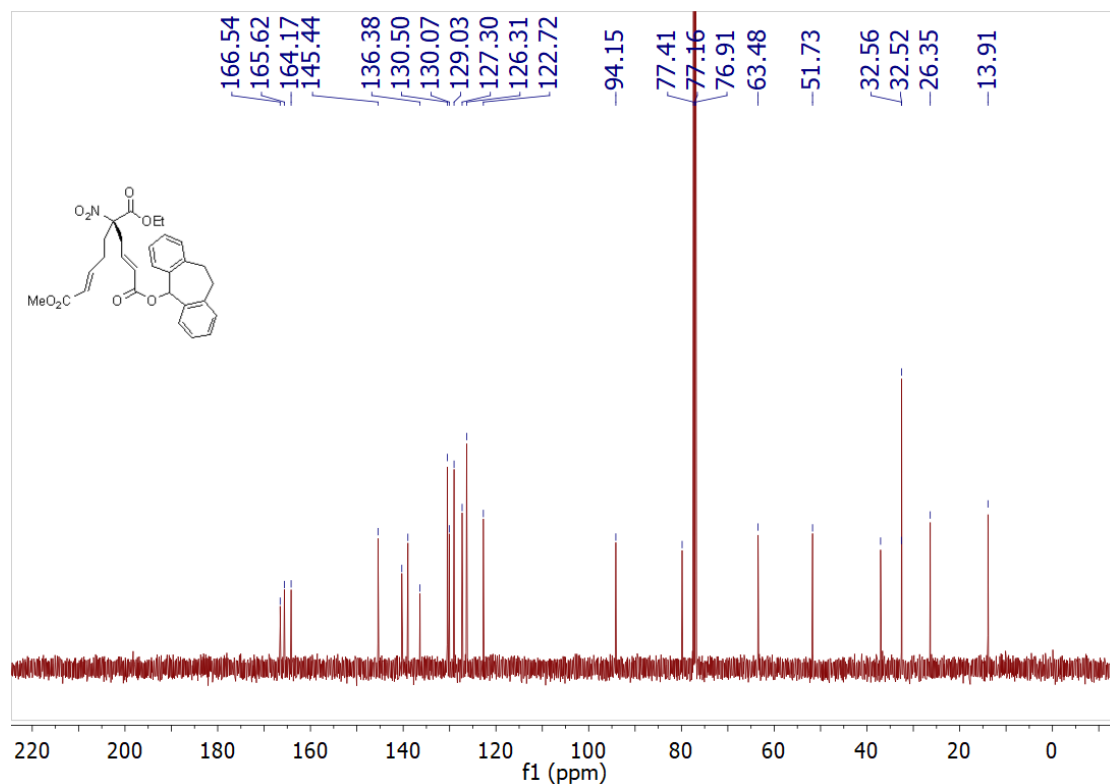

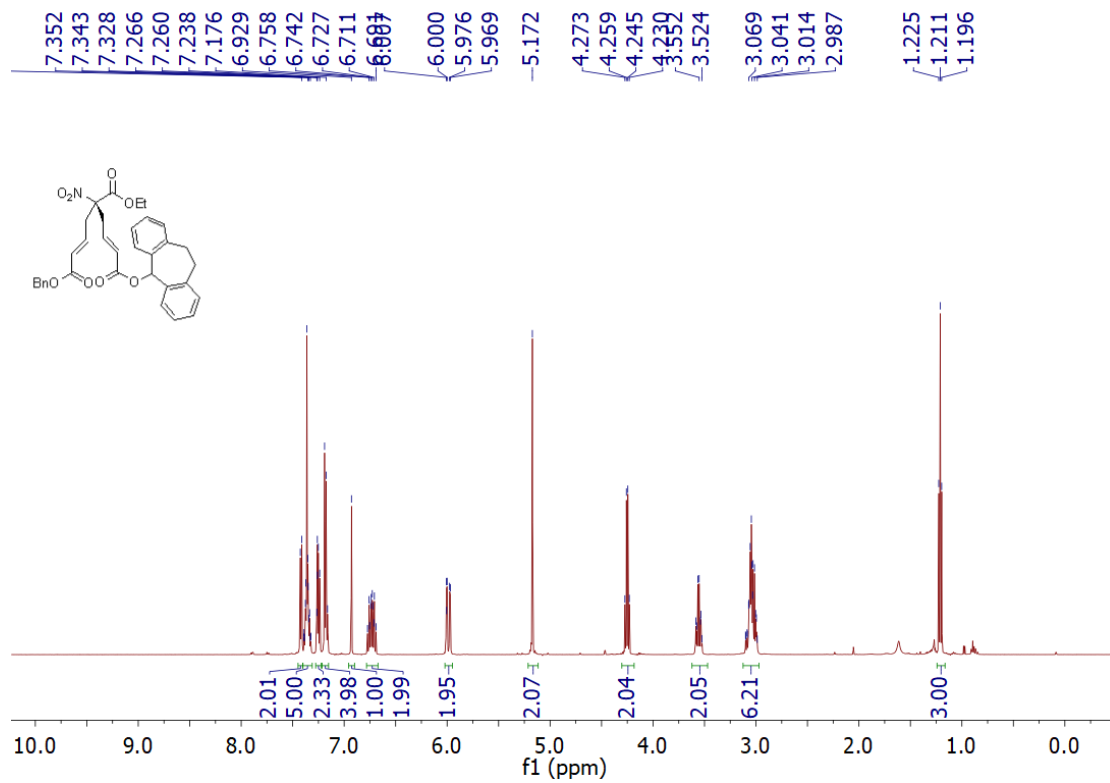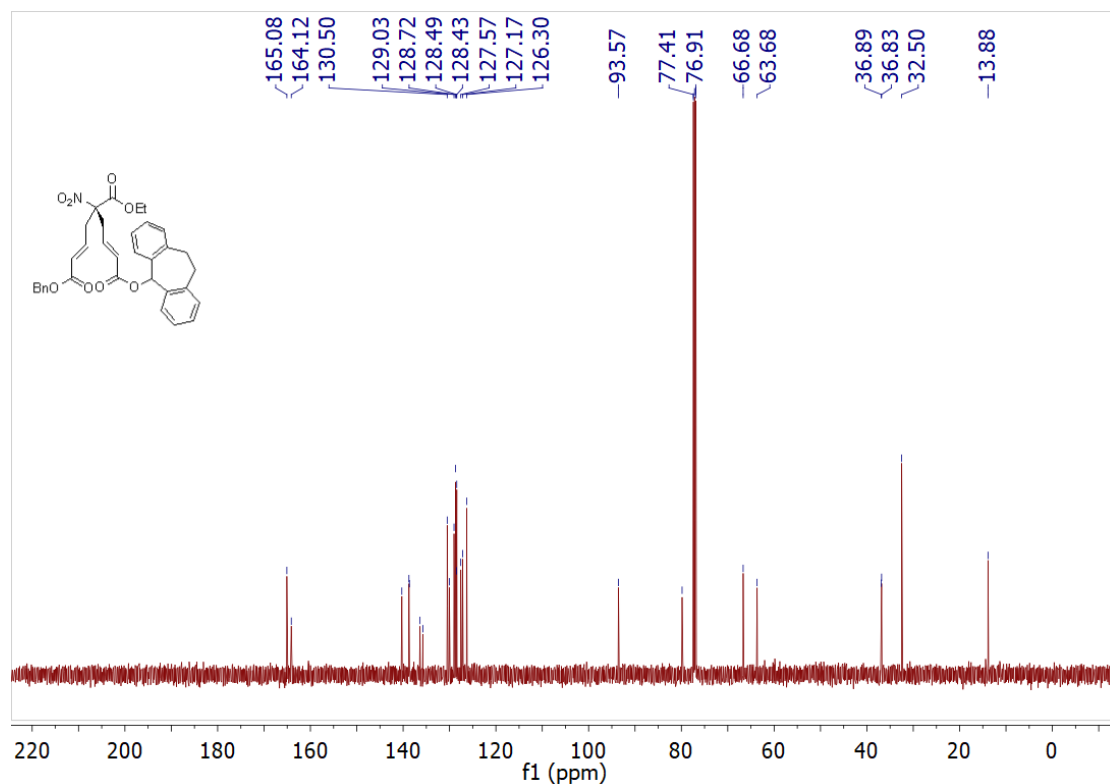



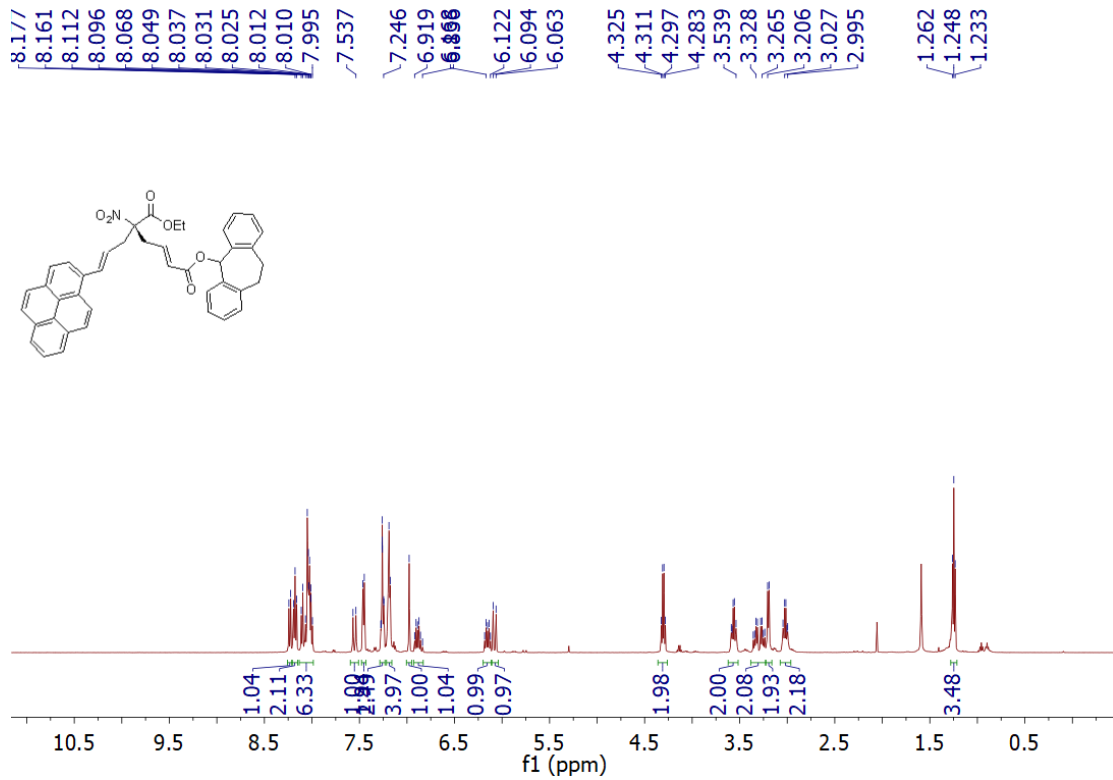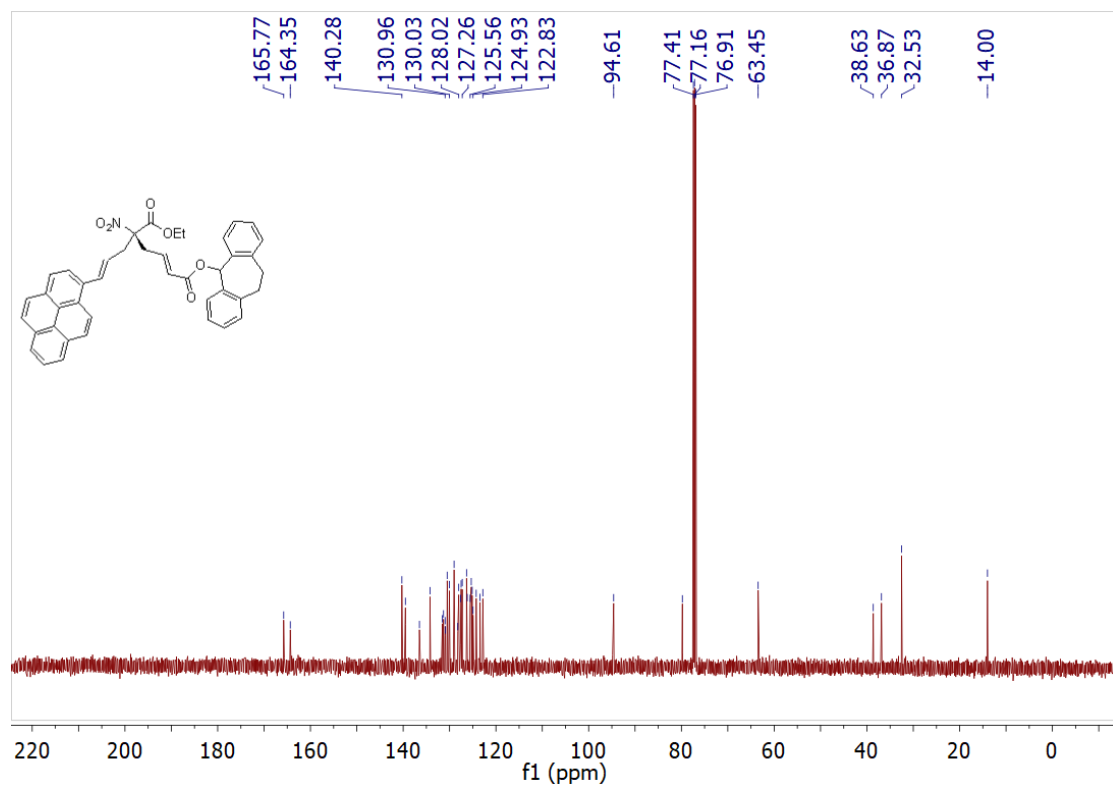

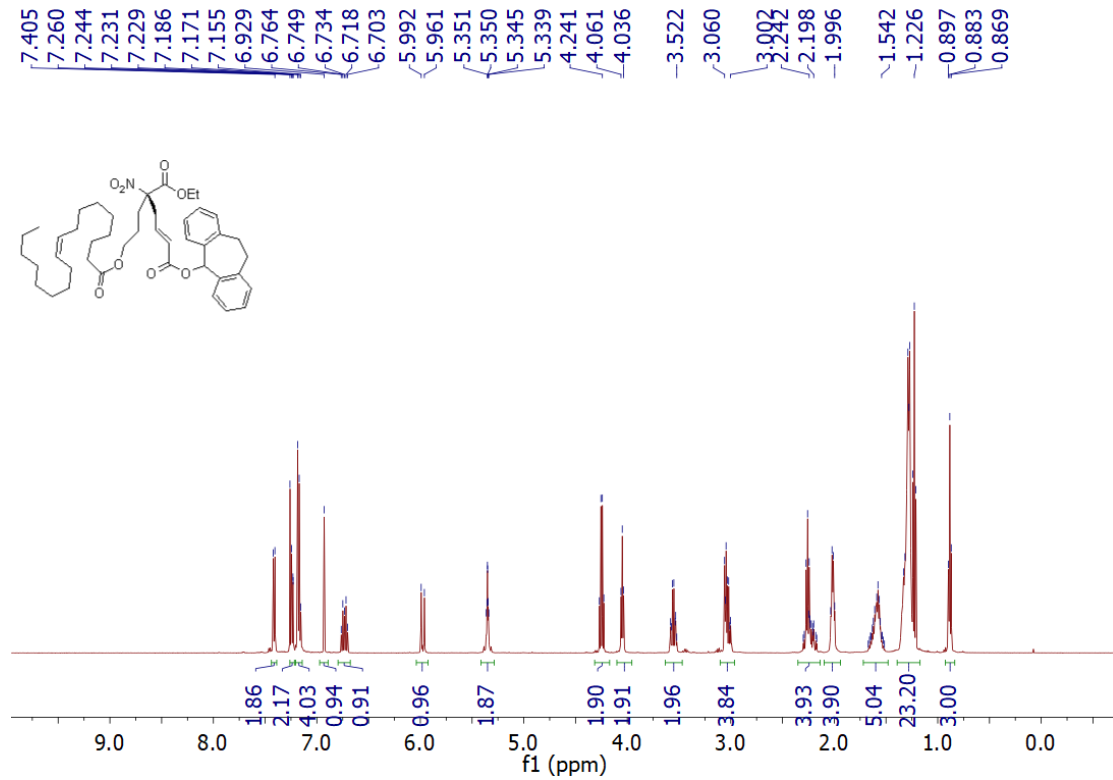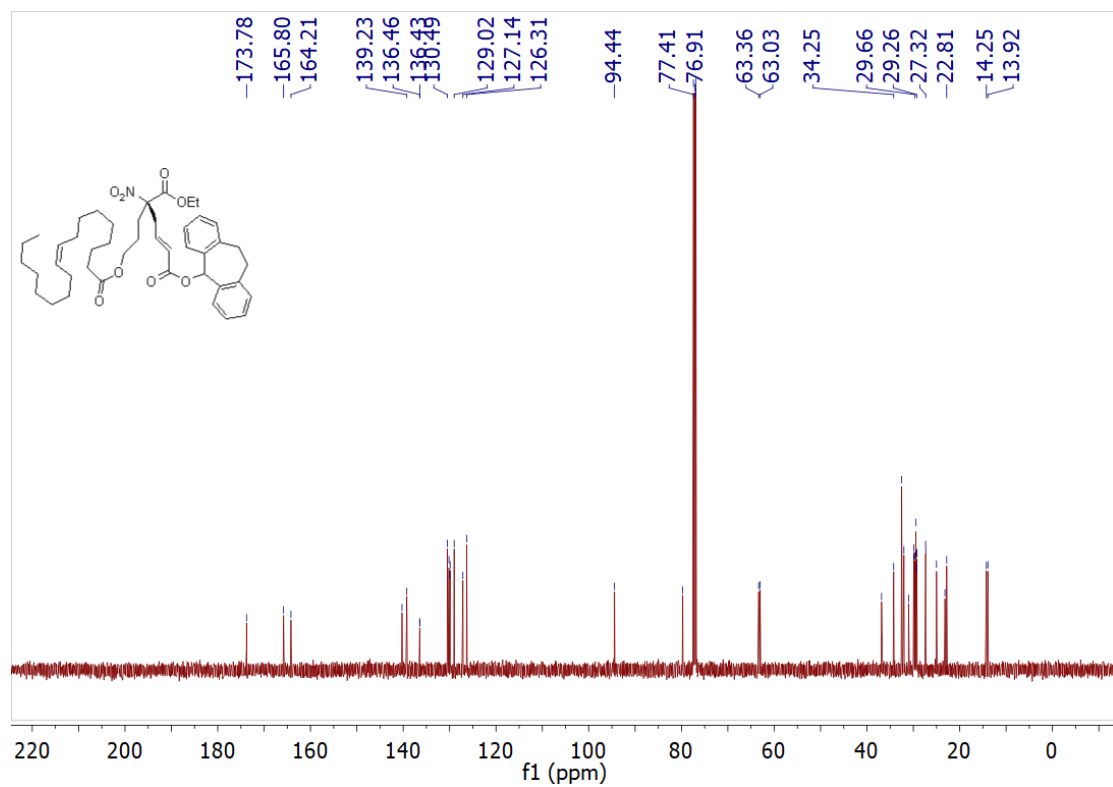

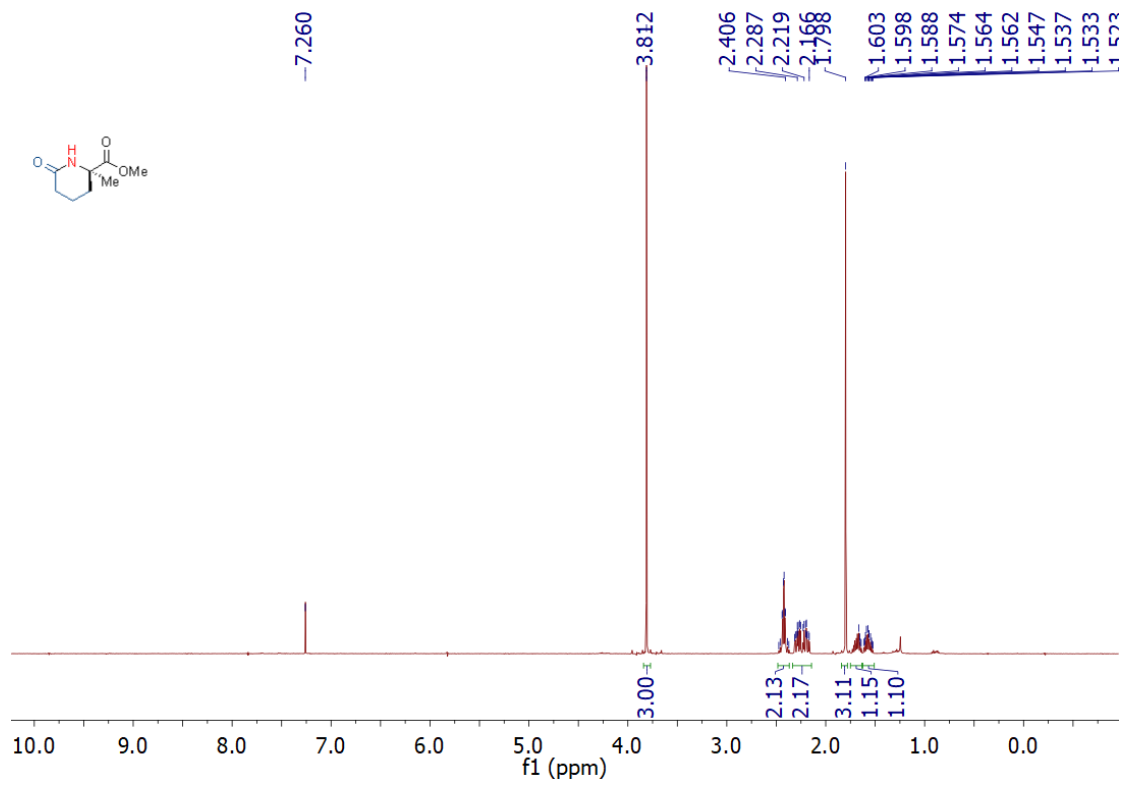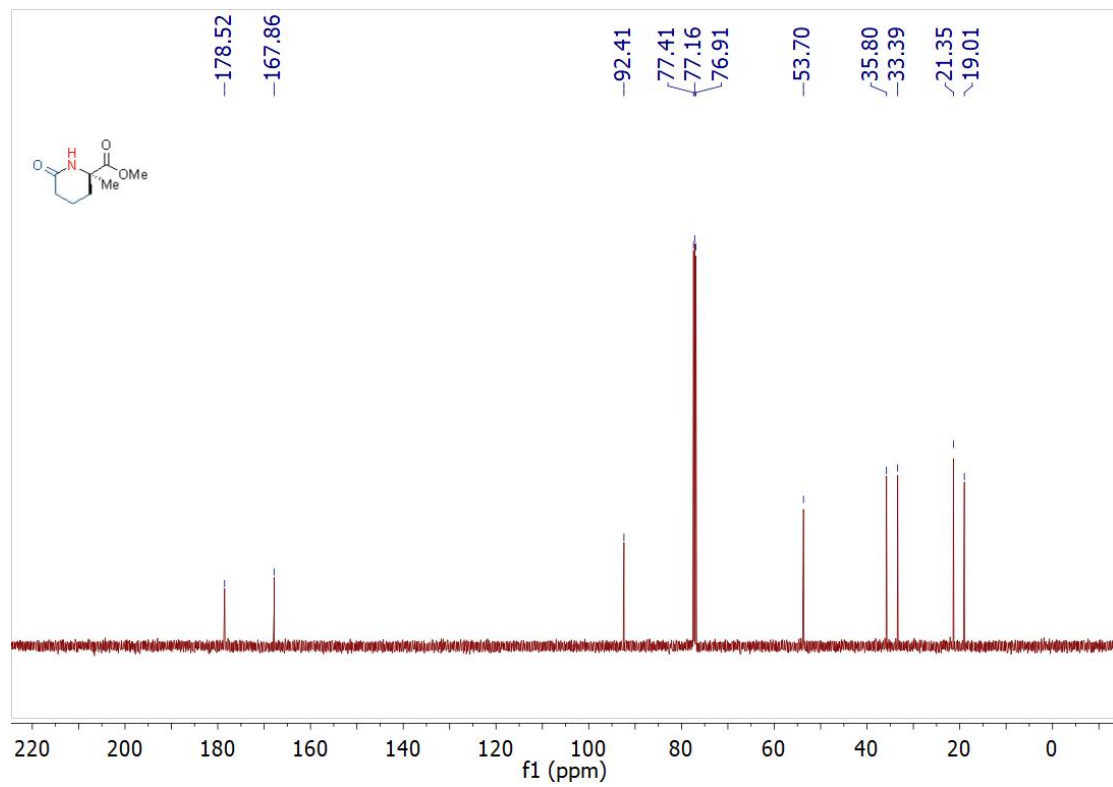

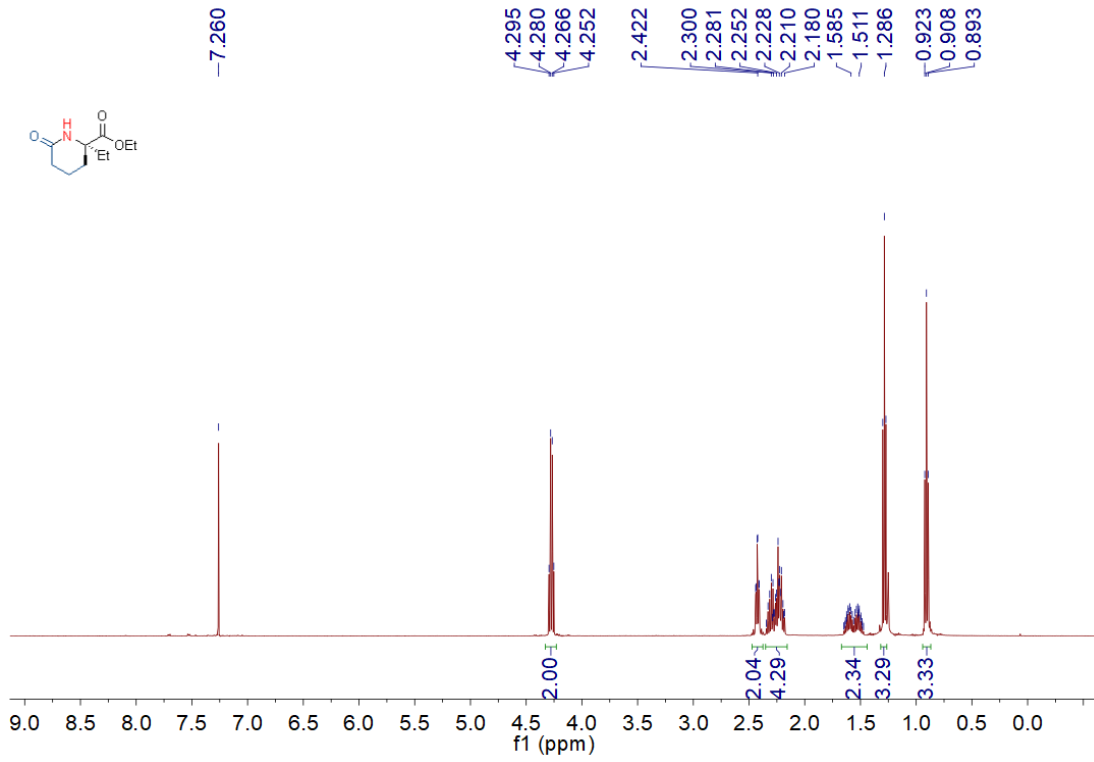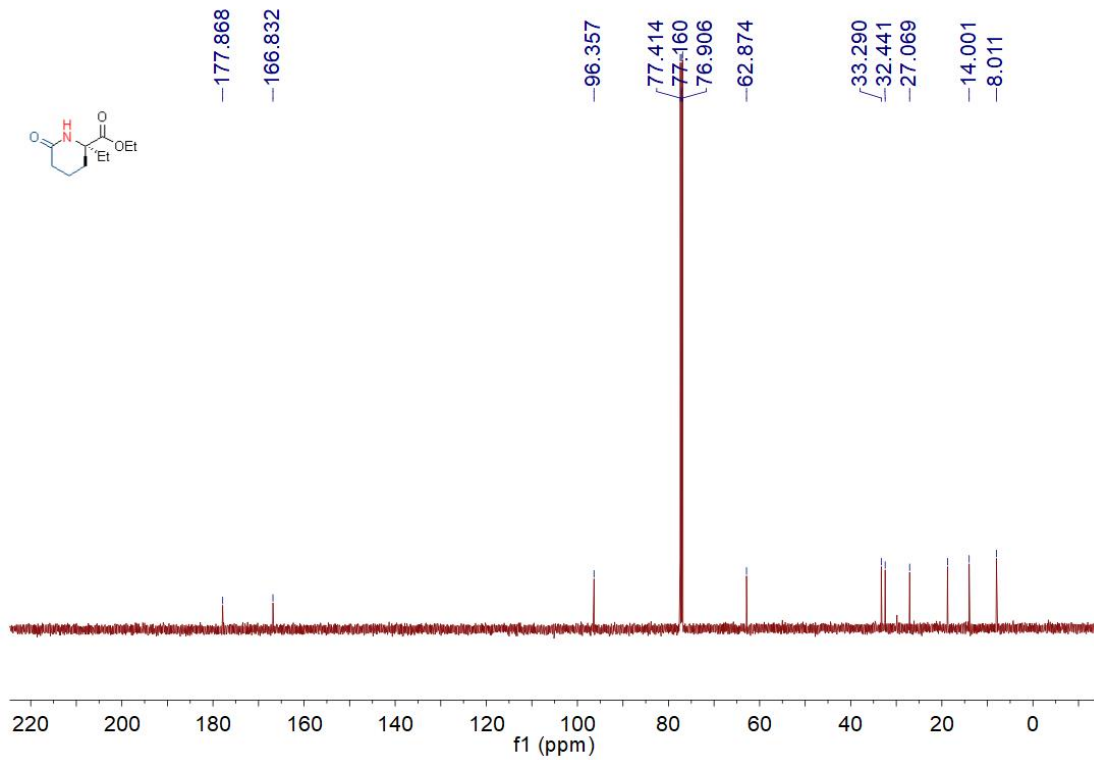

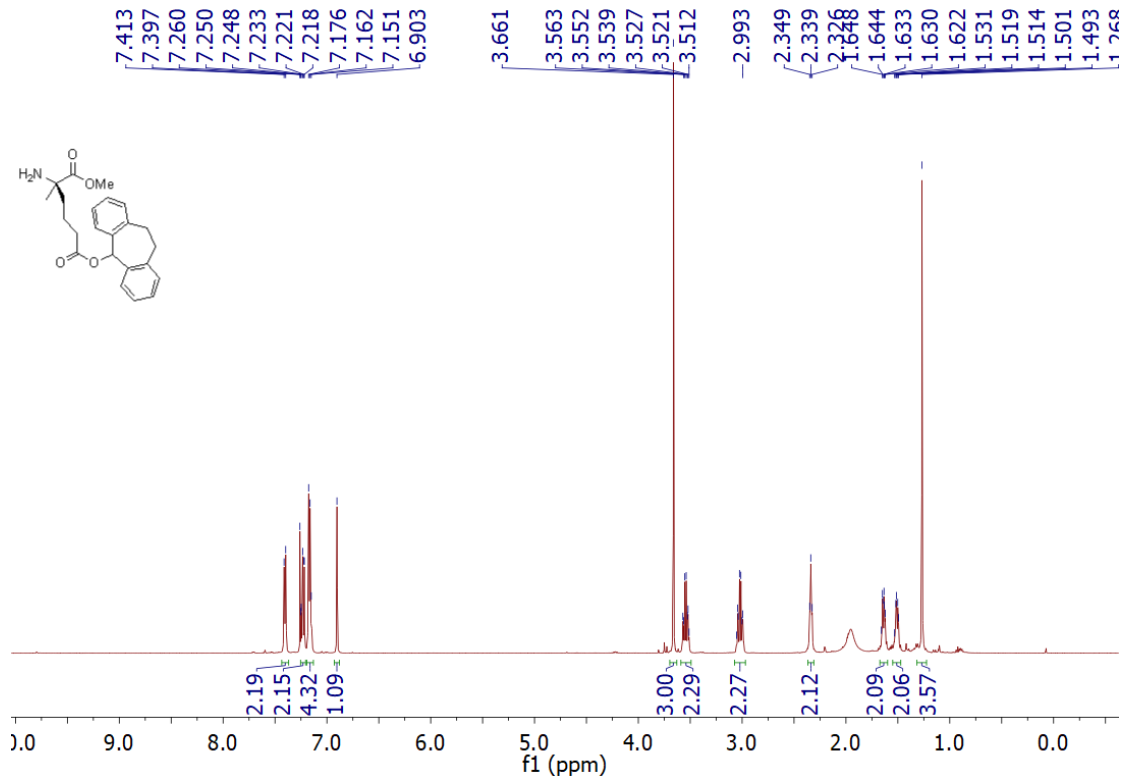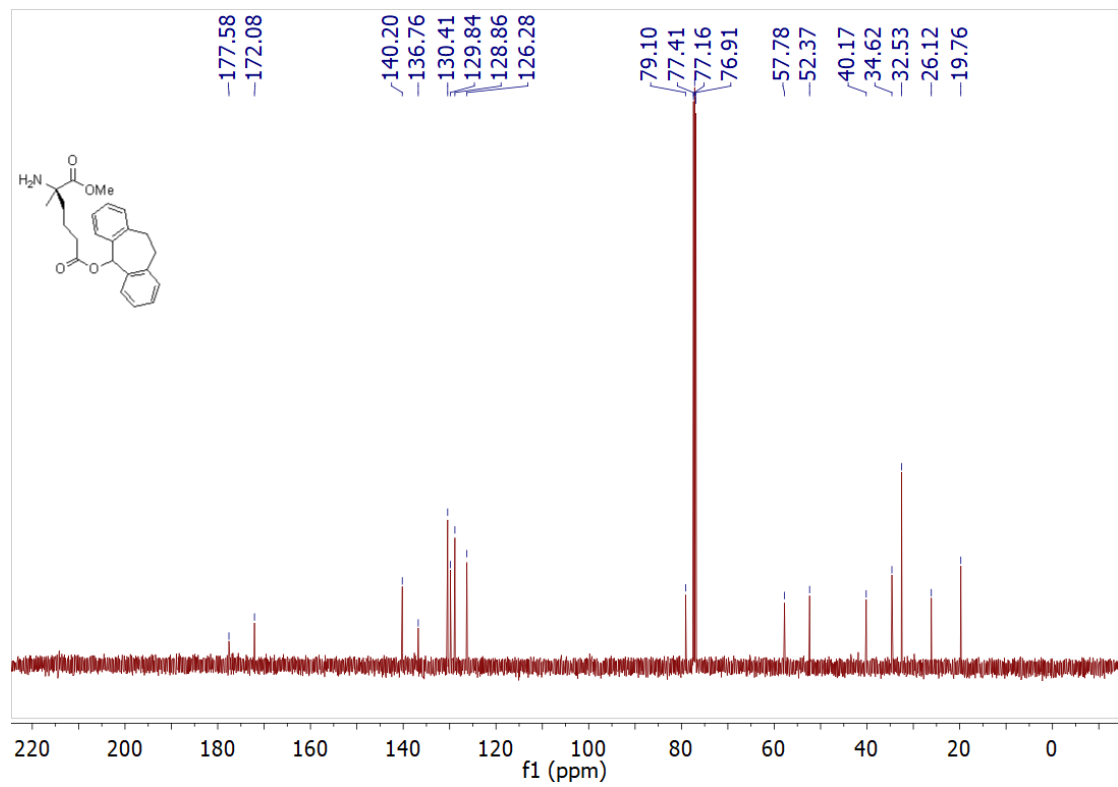

Supplement: d1qo01016f1.pdf [file d1qo01016f1.pdf]
